# Supplementary material for: Analysis of the Diversity of Xylophilus ampelinus Strains Held in CIRM-CFBP Reveals a Strongly Homogenous Species
Source: MDPI journal article supplement (doi:10.3390/microorganisms10081531), 2022-07-28
Supplement: s1 [file s1]

# Analysis of the diversity of *Xylophilus ampelinus* strains held in CIRM-CFBP reveals a strongly homogenous species.

Perrine Portier, Géraldine Taghouti, Paul-Emile Bertrand, Martial Briand, Cécile Dutrieux, Audrey Lathus, and Marion Fischer-Le Saux

Table S1: information on strains used in this study

Table S2: *gyrB-rpoD* sequence alignment for all strains listed in table S1. The *gyrB* sequence span from nucleotides 1 to 723 and *rpoD* sequence from nucleotide 724 to 1383.

Table S3: Results of CheckM [1] Analysis run on the 13 genomes of *Xylophilus* downloaded from Genbank along with the genome of CFBP 1192<sup>T</sup>.

[1]: Parks, D.H.; Imelfort, M.; Skennerton, C.T.; Hugenholtz, P.; Tyson, G.W. CheckM: assessing the quality of microbial genomes recovered from isolates, single cells, and metagenomes. *Genome Res.* **2015** 25(7):1043-55

Figure S1: Phylogenetic tree reconstructed from concatenated partial sequences of *gyrB* and *rpoD* housekeeping genes for 93 strains of *Xylophilus ampelinus* and the type strain of *Acidovorax anthurii* as outgroup. The phylogenetic tree was reconstructed with concatenated alignments of all genes with MEGA 7.0.26 using the neighbour-joining method with 1000 bootstrap replicates, and the evolutionary distances were computed by using the Kimura two-parameter method.

>CFBP1193 *Xylophilus ampelinus*

CACGCCGGCGGCAAGTTCAACCAGAACAGCTACAAGGTCTCGGGCGGCCTGCACGGCGTG  
GGCGTGAGTTGCGTCAACGCGCTCAGCAAGATGCTGCGCCTGACGGTGCGGCGCGACGGC  
AAGGTCCACGTGCTGGAGTTCAGCAAGGGCTTCGTGCAGAACCGCATCGTCGAGCAGGCG  
GGCGGCGTCGAGGTCTCGCCGATGCGCATCATGGGCGACACCGAGAAGCGCGGTACCGAG  
GTGCACTTCCTGCCCCGACAACGAGATCTTCAAGGAAAACGCCGATTTCCACTACGAGATC  
CTGGCCAAGCGCCTGCGCGAACTGAGCTTCCTGAACAACGGCGTGCGCATCCGCCTGAAG  
GACGAGCGCAGCGGCAAGGAAGACGATTTCTCCGGCGCCGGCGGCGTGACAGGGTTTCGT  
GAATTCATCAACAAGGGCAAGACCATCCTGCACCCACGCCCTTCTACGCCGCGGGCGAG  
AAGCCGGCCGAGACGTACGGCGGCATCCCCGGCACGCACATCGGCGTGGAAGTGTGATG  
CAGTGGAACAGCGGCTACACCGAGCAGGTGCTCTGTTTCACCAACAACATCCCGCAGCGC  
GACGGCGGCACCCACCTGACCGGCCTGCGCGCCGCGATGACCCGGATCATCAACAAGTAC  
ATCGAAGAAAACGAGCTGGCCAAGAAGGCCAAGGTGAGGTAACCGGCGACGACATGCGC  
GAAGAAGAGGACATGGCCAAGCGCCGTTTCGCGCCTGAAGGCGTTGATCACGCTCGGCAAG  
ACCCGCGGCTACCTGACGCAGGTGAGATCTCCGACCACCTGCCCCACAAGCTGGTTCGAC  
GCCGAGACGATGGAAGTTCGTGATCGCCATGTTGAACGACATGGGCATCGCGGTCTACGAG  
CAGACGCCCCGACGCCGAGACGCTGTTCCAGAACAACGTCACCCCCACCGCCGCCACTGTC  
GAGGAAGCCGAGGAAGAAGCCGAGGCCGCGCTCTCCACCGTCGACAGCGAATTTCGGCCGC  
ACCACCGACCCGGTCCGCATGTACATGCGCGAAATGGGCACCGTCGAGCTGCTGACCCGC  
GAAGGCGAGATCGAGATCGCCAAGCGCATCGAAGGCGGCATGCAGGCCATGATGGAGGCG  
ATCAGCGCGTCGCCCCGCCACCATCGCCGCGATCCTGGTGATGGGCGAGGACATCCGCGAA  
GGCAAGGTCGTATCTCGACCATCGTCGACGGCTTCTCCAACCCCAACGAAGCCGACGAC  
TACGTGGCCGAGGAGGACTTCGACGAGTTCGACGAGGAAGACGACGACGACGGCAAGGGC  
GGCTCCAAGGCGCTGACCAAGAAGCTGGAAGAATTGAAGCGCGAGGCGCTGTTCGCGCTTC  
GAC

>CFBP1194 *Xylophilus ampelinus*

CACGCCGGCGGCAAGTTCAACCAGAACAGCTACAAGGTCTCGGGCGGCCTGCACGGCGTG  
GGCGTGAGTTGCGTCAACGCGCTCAGCAAGATGCTGCGCCTGACGGTGCGGCGCGACGGC  
AAGGTCCACGTGCTGGAGTTCAGCAAGGGCTTCGTGCAGAACCGCATCGTCGAGCAGGCG  
GGCGGCGTCGAGGTCTCGCCGATGCGCATCATGGGCGACACCGAGAAGCGCGGTACCGAG  
GTGCACTTCCTGCCCCGACAACGAGATCTTCAAGGAAAACGCCGATTTCCACTACGAGATC  
CTGGCCAAGCGCCTGCGCGAACTGAGCTTCCTGAACAACGGCGTGCGCATCCGCCTGAAG  
GACGAGCGCAGCGGCAAGGAAGACGATTTCTCCGGCGCCGGCGGCGTGACAGGGTTTCGT  
GAATTCATCAACAAGGGCAAGACCATCCTGCACCCACGCCCTTCTACGCCGCGGGCGAG  
AAGCCGGCCGAGACGTACGGCGGCATCCCCGGCACGCACATCGGCGTGGAAGTGTGATG  
CAGTGGAACAGCGGCTACACCGAGCAGGTGCTCTGTTTCACCAACAACATCCCGCAGCGC  
GACGGCGGCACCCACCTGACCGGCCTGCGCGCCGCGATGACCCGGATCATCAACAAGTAC  
ATCGAAGAAAACGAGCTGGCCAAGAAGGCCAAGGTGAGGTAACCGGCGACGACATGCGC  
GAAGAAGAGGACATGGCCAAGCGCCGTTTCGCGCCTGAAGGCGTTGATCACGCTCGGCAAG  
ACCCGCGGCTACCTGACGCAGGTGAGATCTCCGACCACCTGCCCCACAAGCTGGTTCGAC  
GCCGAGACGATGGAAGTTCGTGATCGCCATGTTGAACGACATGGGCATCGCGGTCTACGAG  
CAGACGCCCCGACGCCGAGACGCTGTTCCAGAACAACGTCACCCCCACCGCCGCCACTGTC  
GAGGAAGCCGAGGAAGAAGCCGAGGCCGCGCTCTCCACCGTCGACAGCGAATTTCGGCCGC  
ACCACCGACCCGGTCCGCATGTACATGCGCGAAATGGGCACCGTCGAGCTGCTGACCCGC  
GAAGGCGAGATCGAGATCGCCAAGCGCATCGAAGGCGGCATGCAGGCCATGATGGAGGCG  
ATCAGCGCGTCGCCCCGCCACCATCGCCGCGATCCTGGTGATGGGCGAGGACATCCGCGAA  
GGCAAGGTCGTATCTCGACCATCGTCGACGGCTTCTCCAACCCCAACGAAGCCGACGAC  
TACGTGGCCGAGGAGGACTTCGACGAGTTCGACGAGGAAGACGACGACGACGGCAAGGGC  
GGCTCCAAGGCGCTGACCAAGAAGCTGGAAGAATTGAAGCGCGAGGCGCTGTTCGCGCTTC  
GAC

>CFBP1313 *Xylophilus ampelinus*

CACGCCGGCGGCAAGTTCAACCAGAACAGCTACAAGGTCTCGGGCGGCCTGCACGGCGTG  
GGCGTGAGTTGCGTCAACGCGCTCAGCAAGATGCTGCGCCTGACGGTGCGGCGCGACGGC  
AAGGTCCACGTGCTGGAGTTCAGCAAGGGCTTCGTGCAGAACCGCATCGTCGAGCAGGCG  
GGCGGCGTCGAGGTCTCGCCGATGCGCATCATGGGCGACACCGAGAAGCGCGGTACCGAG  
GTGCACTTCCTGCCCCGACAACGAGATCTTCAAGGAAAACGCCGATTTCCACTACGAGATC  
CTGGCCAAGCGCCTGCGCGAACTGAGCTTCCTGAACAACGGCGTGCGCATCCGCCTGAAG  
GACGAGCGCAGCGGCAAGGAAGACGATTTCTCCGGCGCCGGCGGCGTGACAGGGTTTCGT

GAATTCATCAACAAGGGCAAGACCATCCTGCACCCACGCCCTTCTACGCCGCGGGCGAG  
AAGCCGGCCGAGACGTACGGCGGCATCCCCGGCAGGCACATCGGCGTGGAAGTGTGATG  
CAGTGGAACAGCGGCTACACCGAGCAGGTGCTCTGTTTCACCAACAACATCCCGCAGCGC  
GACGGCGGCACCCACCTGACCGGCCTGCGCGCCGCGATGACCCGGATCATCAACAAGTAC  
ATCGAAGAAAACGAGCTGGCCAAGAAGGCCAAGGTGAGGTAACCGGCGACGACATGCGC  
GAAGAAGAGGACATGGCCAAGCGCCGTTTCGCGCCTGAAGGCGTTGATCACGCTCGGCAAG  
ACCCGCGGCTACCTGACGCAGGTGAGATCTCCGACCACCTGCCCCACAAGCTGGTTCGAC  
GCCGAGACGATGGAAGTCGTGATCGCCATGTTGAACGACATGGGCATCGCGGTCTACGAG  
CAGACGCCCCGACGCCGAGACGCTGTTCCAGAACAACGTCACCCCCACCGCCGCCACTGTC  
GAGGAAGCCGAGGAAGAAGCCGAGGCCGCGCTCTCCACCGTCGACAGCGAATTTCGGCCGC  
ACCACCGACCCGGTCCGCATGTACATGCGCGAAATGGGCACCGTCGAGCTGCTGACCCGC  
GAAGGCGAGATCGAGATCGCCAAGCGCATCGAAGGCGGCCTGCAGGCCATGATGGAGGCG  
ATCAGCGCGTCGCCCCGCCACCATCGCCGCGATCCTGGTGATGGGCGAGGACATCCGCGAA  
GGCAAGGTCGTATCTCGACCATCGTCGACGGCTTCTCCAACCCCAACGAAGCCGACGAC  
TACGTGGCCGAGGAGGACTTCGACGAGTTCGACGAGGAAGACGACGACGACGGAAGGGC  
GGCTCCAAGGCGCTGACCAAGAAGCTGGAAGAATTGAAGCGCGAGGCGCTGTTCGCGCTTC  
GAC

>CFBP1393 *Xylophilus ampelinus*

CACGCCGGCGGCAAGTTCAACCAGAACAGCTACAAGGTCTCGGGCGGCCTGCACGGCGTG  
GGCGTGAGTTGCGTCAACGCGCTCAGCAAGATGCTGCGCCTGACGGTGCGGCGCGACGGC  
AAGGTCCACGTGCTGGAGTTCAGCAAGGGCTTCGTGCAGAACCGCATCGTCGAGCAGGCG  
GGCGGCGTCGAGGTCTCGCCGATGCGCATCATGGGCGACACCGAGAAGCGCGGTACCGAG  
GTGCACTTCCTGCCCCACAACGAGATCTTCAAGGAAAACGCCGATTTCCACTACGAGATC  
CTGGCCAAGCGCCTGCGCGAACTGAGCTTCCTGAACAACGGCGTGCGCATCCGCCTGAAG  
GACGAGCGCAGCGGCAAGGAAGACGATTTCTCCGGCGCCGGCGGCGTGAGGGTTTCGTTC  
GAATTCATCAACAAGGGCAAGACCATCCTGCACCCACGCCCTTCTACGCCGCGGGCGAG  
AAGCCGGCCGAGACGTACGGCGGCATCCCCGGCAGGCACATCGGCGTGGAAGTGTGATG  
CAGTGGAACAGCGGCTACACCGAGCAGGTGCTCTGTTTCACCAACAACATCCCGCAGCGC  
GACGGCGGCACCCACCTGACCGGCCTGCGCGCCGCGATGACCCGGATCATCAACAAGTAC  
ATCGAAGAAAACGAGCTGGCCAAGAAGGCCAAGGTGAGGTAACCGGCGACGACATGCGC  
GAAGAAGAGGACATGGCCAAGCGCCGTTTCGCGCCTGAAGGCGTTGATCACGCTCGGCAAG  
ACCCGCGGCTACCTGACGCAGGTGAGATCTCCGACCACCTGCCCCACAAGCTGGTTCGAC  
GCCGAGACGATGGAAGTCGTGATCGCCATGTTGAACGACATGGGCATCGCGGTCTACGAG  
CAGACGCCCCGACGCCGAGACGCTGTTCCAGAACAACGTCACCCCCACCGCCGCCACTGTC  
GAGGAAGCCGAGGAAGAAGCCGAGGCCGCGCTCTCCACCGTCGACAGCGAATTTCGGCCGC  
ACCACCGACCCGGTCCGCATGTACATGCGCGAAATGGGCACCGTCGAGCTGCTGACCCGC  
GAAGGCGAGATCGAGATCGCCAAGCGCATCGAAGGCGGCCTGCAGGCCATGATGGAGGCG  
ATCAGCGCGTCGCCCCGCCACCATCGCCGCGATCCTGGTGATGGGCGAGGACATCCGCGAA  
GGCAAGGTCGTATCTCGACCATCGTCGACGGCTTCTCCAACCCCAACGAAGCCGACGAC  
TACGTGGCCGAGGAGGACTTCGACGAGTTCGACGAGGAAGACGACGACGACGGAAGGGC  
GGCTCCAAGGCGCTGACCAAGAAGCTGGAAGAATTGAAGCGCGAGGCGCTGTTCGCGCTTC  
GAC

>CFBP1394 *Xylophilus ampelinus*

CACGCCGGCGGCAAGTTCAACCAGAACAGCTACAAGGTCTCGGGCGGCCTGCACGGCGTG  
GGCGTGAGTTGCGTCAACGCGCTCAGCAAGATGCTGCGCCTGACGGTGCGGCGCGACGGC  
AAGGTCCACGTGCTGGAGTTCAGCAAGGGCTTCGTGCAGAACCGCATCGTCGAGCAGGCG  
GGCGGCGTCGAGGTCTCGCCGATGCGCATCATGGGCGACACCGAGAAGCGCGGTACCGAG  
GTGCACTTCCTGCCCCACAACGAGATCTTCAAGGAAAACGCCGATTTCCACTACGAGATC  
CTGGCCAAGCGCCTGCGCGAACTGAGCTTCCTGAACAACGGCGTGCGCATCCGCCTGAAG  
GACGAGCGCAGCGGCAAGGAAGACGATTTCTCCGGCGCCGGCGGCGTGAGGGTTTCGTTC  
GAATTCATCAACAAGGGCAAGACCATCCTGCACCCACGCCCTTCTACGCCGCGGGCGAG  
AAGCCGGCCGAGACGTACGGCGGCATCCCCGGCAGGCACATCGGCGTGGAAGTGTGATG  
CAGTGGAACAGCGGCTACACCGAGCAGGTGCTCTGTTTCACCAACAACATCCCGCAGCGC  
GACGGCGGCACCCACCTGACCGGCCTGCGCGCCGCGATGACCCGGATCATCAACAAGTAC  
ATCGAAGAAAACGAGCTGGCCAAGAAGGCCAAGGTGAGGTAACCGGCGACGACATGCGC  
GAAGAAGAGGACATGGCCAAGCGCCGTTTCGCGCCTGAAGGCGTTGATCACGCTCGGCAAG  
ACCCGCGGCTACCTGACGCAGGTGAGATCTCCGACCACCTGCCCCACAAGCTGGTTCGAC  
GCCGAGACGATGGAAGTCGTGATCGCCATGTTGAACGACATGGGCATCGCGGTCTACGAG

CAGACGCCCCGACGCCGAGACGCTGTTCCAGAACAACGTCACCCCCACCGCCGCCACTGTC  
GAGGAAGCCGAGGAAGAAGCCGAGGCCGCGCTCTCCACCGTCGACAGCGAATTTCGGCCGC  
ACCACCGACCCGGTCCGCATGTACATGCGCGAAATGGGCACCGTCGAGCTGCTGACCCGC  
GAAGGCGAGATCGAGATCGCCAAGCGCATCGAAGGCGGCCTGCAGGCCATGATGGAGGCG  
ATCAGCGCGTCGCCCCGCCACCATCGCCGCGATCCTGGTGATGGGCGAGGACATCCGCGAA  
GGCAAGGTCGTTCATCTCGACCATCGTCGACGGCTTCTCCAACCCCAACGAAGCCGACGAC  
TACGTGGCCGAGGAGGACTTCGACGAGTTCGACGAGGAAGACGACGACGACGCGCAAGGGC  
GGCTCCAAGGCGCTGACCAAGAAGCTGGAAGAATTGAAGCGCGAGGCGCTGTTCGCGCTTC  
GAC

>CFBP1796 *Xylophilus ampelinus*

CACGCCGGCGGCAAGTTCAACCAGAACAGCTACAAGGTCTCGGGCGGCCTGCACGGCGTG  
GGCGTGAGTTGCGTCAACGCGCTCAGCAAGATGCTGCGCCTGACGGTGCGGCGCGACGGC  
AAGGTCCACGTGCTGGAGTTCAGCAAGGGCTTCGTGCAGAACCGCATCGTCGAGCAGGCG  
GGCGGCGTCGAGGTCTCGCCGATGCGCATCATGGGCGACACCGAGAAGCGCGGTACCGAG  
GTGCACTTCTGCCCCGACAACGAGATCTTCAAGGAAAACGCCGATTTCCACTACGAGATC  
CTGGCCAAGCGCCTGCGCGAACTGAGCTTCTGAACAACGGCGTGCGCATCCGCCTGAAG  
GACGAGCGCAGCGGCAAGGAAGACGATTTCTCCGGCGCCGGCGGCGTGAGGGTTTCGTTC  
GAATTCATCAACAAGGGCAAGACCATCCTGCACCCACGCCCTTCTACGCCGCGGGCGAG  
AAGCCGGCCGAGACGTACGGCGGCATCCCCGGCACGCACATCGGCGTGGAAGTGTTCGATG  
CAGTGGAACAGCGGCTACACCGAGCAGGTGCTCTGTTTCACCAACAACATCCCGCAGCGC  
GACGGCGGCACCCACCTGACCGGCCTGCGCGCCGCGATGACCCGGATCATCAACAAGTAC  
ATCGAAGAAAACGAGCTGGCCAAGAAGGCCAAGGTTCGAGGTAACCGGCGACGACATGCGC  
GAAGAAGAGGACATGGCCAAGCGCCGTTTCGCGCCTGAAGGCGTTGATCACGCTCGGCAAG  
ACCCGCGGCTACCTGACGCGAGTTCGAGATCTCCGACCACCTGCCCCGACAAGCTGGTCGAC  
GCCGAGACGATGGAAGTCGTGATCGCCATGTTGAACGACATGGGCATCGCGGTCTACGAG  
CAGACGCCCCGACGCCGAGACGCTGTTCCAGAACAACGTCACCCCCACCGCCGCCACTGTC  
GAGGAAGCCGAGGAAGAAGCCGAGGCCGCGCTCTCCACCGTCGACAGCGAATTTCGGCCGC  
ACCACCGACCCGGTCCGCATGTACATGCGCGAAATGGGCACCGTCGAGCTGCTGACCCGC  
GAAGGCGAGATCGAGATCGCCAAGCGCATCGAAGGCGGCCTGCAGGCCATGATGGAGGCG  
ATCAGCGCGTCGCCCCGCCACCATCGCCGCGATCCTGGTGATGGGCGAGGACATCCGCGAA  
GGCAAGGTCGTTCATCTCGACCATCGTCGACGGCTTCTCCAACCCCAACGAAGCCGACGAC  
TACGTGGCCGAGGAGGACTTCGACGAGTTCGACGAGGAAGACGACGACGACGCGCAAGGGC  
GGCTCCAAGGCGCTGACCAAGAAGCTGGAAGAATTGAAGCGCGAGGCGCTGTTCGCGCTTC  
GAC

>CFBP1797 *Xylophilus ampelinus*

CACGCCGGCGGCAAGTTCAACCAGAACAGCTACAAGGTCTCGGGCGGCCTGCACGGCGTG  
GGCGTGAGTTGCGTCAACGCGCTCAGCAAGATGCTGCGCCTGACGGTGCGGCGCGACGGC  
AAGGTCCACGTGCTGGAGTTCAGCAAGGGCTTCGTGCAGAACCGCATCGTCGAGCAGGCG  
GGCGGCGTCGAGGTCTCGCCGATGCGCATCATGGGCGACACCGAGAAGCGCGGTACCGAG  
GTGCACTTCTGCCCCGACAACGAGATCTTCAAGGAAAACGCCGATTTCCACTACGAGATC  
CTGGCCAAGCGCCTGCGCGAACTGAGCTTCTGAACAACGGCGTGCGCATCCGCCTGAAG  
GACGAGCGCAGCGGCAAGGAAGACGATTTCTCCGGCGCCGGCGGCGTGAGGGTTTCGTTC  
GAATTCATCAACAAGGGCAAGACCATCCTGCACCCACGCCCTTCTACGCCGCGGGCGAG  
AAGCCGGCCGAGACGTACGGCGGCATCCCCGGCACGCACATCGGCGTGGAAGTGTTCGATG  
CAGTGGAACAGCGGCTACACCGAGCAGGTGCTCTGTTTCACCAACAACATCCCGCAGCGC  
GACGGCGGCACCCACCTGACCGGCCTGCGCGCCGCGATGACCCGGATCATCAACAAGTAC  
ATCGAAGAAAACGAGCTGGCCAAGAAGGCCAAGGTTCGAGGTAACCGGCGACGACATGCGC  
GAAGAAGAGGACATGGCCAAGCGCCGTTTCGCGCCTGAAGGCGTTGATCACGCTCGGCAAG  
ACCCGCGGCTACCTGACGCGAGTTCGAGATCTCCGACCACCTGCCCCGACAAGCTGGTCGAC  
GCCGAGACGATGGAAGTCGTGATCGCCATGTTGAACGACATGGGCATCGCGGTCTACGAG  
CAGAGCCCCGACGCCGAGACGCTGTTCCAGAACAACGTCACCCCCACCGCCGCCACTGTC  
GAGGAAGCCGAGGAAGAAGCCGAGGCCGCGCTCTCCACCGTCGACAGCGAATTTCGGCCGC  
ACCACCGACCCGGTCCGCATGTACATGCGCGAAATGGGCACCGTCGAGCTGCTGACCCGC  
GAAGGCGAGATCGAGATCGCCAAGCGCATCGAAGGCGGCCTGCAGGCCATGATGGAGGCG  
ATCAGCGCGTCGCCCCGCCACCATCGCCGCGATCCTGGTGATGGGCGAGGACATCCGCGAA  
GGCAAGGTCGTTCATCTCGACCATCGTCGACGGCTTCTCCAACCCCAACGAAGCCGACGAC  
TACGTGGCCGAGGAGGACTTCGACGAGTTCGACGAGGAAGACGACGACGACGCGCAAGGGC  
GGCTCCAAGGCGCTGACCAAGAAGCTGGAAGAATTGAAGCGCGAGGCGCTGTTCGCGCTTC

GAC

>CFBP1798 *Xylophilus ampelinus*

CACGCCGGCGGCAAGTTCAACCAGAACAGCTACAAGGTCTCGGGCGGCCTGCACGGCGTG  
GGCGTGAGTTGCGTCAACGCGCTCAGCAAGATGCTGCGCCTGACGGTGCGGCGCGACGGC  
AAGGTCCACGTGCTGGAGTTCAGCAAGGGCTTCGTGCAGAACCGCATCGTCGAGCAGGCG  
GGCGGCGTCGAGGTCTCGCCGATGCGCATCATGGGCGACACCGAGAAGCGCGGTACCGAG  
GTGCACTTCCTGCCCAGACAACGAGATCTTCAAGGAAAACGCCGATTTCCACTACGAGATC  
CTGGCCAAGCGCCTGCGCGAACTGAGCTTCCTGAACAACGGCGTGCGCATCCGCCTGAAG  
GACGAGCGCAGCGGCAAGGAAGACGATTTCTCCGGCGCCGGCGGCGTGAGGGTTTCGT  
GAATTCATCAACAAGGGCAAGACCATCCTGCACCCACGCCCTTCTACGCCGCGGGCGAG  
AAGCCGGCCGAGACGTACGGCGGCATCCCCGGCACGCACATCGGCGTGGAAGTGTGATG  
CAGTGGAACAGCGGCTACACCGAGCAGGTGCTCTGTTTCACCAACAACATCCCGCAGCGC  
GACGGCGGCACCCACCTGACCGGCCTGCGCGCCGCGATGACCCGGATCATCAACAAGTAC  
ATCGAAGAAAACGAGCTGGCCAAGAAGGCCAAGGTTCGAGGTAACCGGCGACGACATGCGC  
GAAGAAGAGGACATGGCCAAGCGCCGTTTCGCGCCTGAAGGCGTTGATCACGCTCGGCAAG  
ACCCGCGGCTACCTGACGCAGGTTCGAGATCTCCGACCACCTGCCCAGACAAGCTGGTTCGAC  
GCCGAGACGATGGAAGTCGTGATCGCCATGTTGAACGACATGGGCATCGCGGTCTACGAG  
CAGACGCCCCGACGCCGAGACGCTGTTCCAGAACAACGTCACCCCCACCGCCGCCACTGTC  
GAGGAAGCCGAGGAAGAAGCCGAGGCCGCGCTCTCCACCGTCGACAGCGAATTTCGGCCGC  
ACCACCGACCCGGTCCGCATGTACATGCGCGAAATGGGCACCGTCGAGCTGCTGACCCGC  
GAAGGCGAGATCGAGATCGCCAAGCGCATCGAAGGCGGCCTGCAGGCCATGATGGAGGCG  
ATCAGCGCGTCGCCCCGCCACCATCGCCGCGATCCTGGTGATGGGCGAGGACATCCGCGAA  
GGCAAGGTCGTATCTCGACCATCGTCGACGGCTTCTCCAACCCCAACGAAGCCGACGAC  
TACGTGGCCGAGGAGGACTTCGACGAGTTCGACGAGGAAGACGACGACGACGGCAAGGGC  
GGCTCCAAGGCGCTGACCAAGAAGCTGGAAGAATTGAAGCGCGAGGCGCTGTGCGGCTTC  
GAC

>CFBP1799 *Xylophilus ampelinus*

CACGCCGGCGGCAAGTTCAACCAGAACAGCTACAAGGTCTCGGGCGGCCTGCACGGCGTG  
GGCGTGAGTTGCGTCAACGCGCTCAGCAAGATGCTGCGCCTGACGGTGCGGCGCGACGGC  
AAGGTCCACGTGCTGGAGTTCAGCAAGGGCTTCGTGCAGAACCGCATCGTCGAGCAGGCG  
GGCGGCGTCGAGGTCTCGCCGATGCGCATCATGGGCGACACCGAGAAGCGCGGTACCGAG  
GTGCACTTCCTGCCCAGACAACGAGATCTTCAAGGAAAACGCCGATTTCCACTACGAGATC  
CTGGCCAAGCGCCTGCGCGAACTGAGCTTCCTGAACAACGGCGTGCGCATCCGCCTGAAG  
GACGAGCGCAGCGGCAAGGAAGACGATTTCTCCGGCGCCGGCGGCGTGAGGGTTTCGT  
GAATTCATCAACAAGGGCAAGACCATCCTGCACCCACGCCCTTCTACGCCGCGGGCGAG  
AAGCCGGCCGAGACGTACGGCGGCATCCCCGGCACGCACATCGGCGTGGAAGTGTGATG  
CAGTGGAACAGCGGCTACACCGAGCAGGTGCTCTGTTTCACCAACAACATCCCGCAGCGC  
GACGGCGGCACCCACCTGACCGGCCTGCGCGCCGCGATGACCCGGATCATCAACAAGTAC  
ATCGAAGAAAACGAGCTGGCCAAGAAGGCCAAGGTTCGAGGTAACCGGCGACGACATGCGC  
GAAGAAGAGGACATGGCCAAGCGCCGTTTCGCGCCTGAAGGCGTTGATCACGCTCGGCAAG  
ACCCGCGGCTACCTGACGCAGGTTCGAGATCTCCGACCACCTGCCCAGACAAGCTGGTTCGAC  
GCCGAGACGATGGAAGTCGTGATCGCCATGTTGAACGACATGGGCATCGCGGTCTACGAG  
CAGACGCCCCGACGCCGAGACGCTGTTCCAGAACAACGTCACCCCCACCGCCGCCACTGTC  
GAGGAAGCCGAGGAAGAAGCCGAGGCCGCGCTCTCCACCGTCGACAGCGAATTTCGGCCGC  
ACCACCGACCCGGTCCGCATGTACATGCGCGAAATGGGCACCGTCGAGCTGCTGACCCGC  
GAAGGCGAGATCGAGATCGCCAAGCGCATCGAAGGCGGCCTGCAGGCCATGATGGAGGCG  
ATCAGCGCGTCGCCCCGCCACCATCGCCGCGATCCTGGTGATGGGCGAGGACATCCGCGAA  
GGCAAGGTCGTATCTCGACCATCGTCGACGGCTTCTCCAACCCCAACGAAGCCGACGAC  
TACGTGGCCGAGGAGGACTTCGACGAGTTCGACGAGGAAGACGACGACGACGGCAAGGGC  
GGCTCCAAGGCGCTGACCAAGAAGCTGGAAGAATTGAAGCGCGAGGCGCTGTGCGGCTTC  
GAC

>CFBP1800 *Xylophilus ampelinus*

CACGCCGGCGGCAAGTTCAACCAGAACAGCTACAAGGTCTCGGGCGGCCTGCACGGCGTG  
GGCGTGAGTTGCGTCAACGCGCTCAGCAAGATGCTGCGCCTGACGGTGCGGCGCGACGGC  
AAGGTCCACGTGCTGGAGTTCAGCAAGGGCTTCGTGCAGAACCGCATCGTCGAGCAGGCG  
GGCGGCGTCGAGGTCTCGCCGATGCGCATCATGGGCGACACCGAGAAGCGCGGTACCGAG  
GTGCACTTCCTGCCCAGACAACGAGATCTTCAAGGAAAACGCCGATTTCCACTACGAGATC  
CTGGCCAAGCGCCTGCGCGAACTGAGCTTCCTGAACAACGGCGTGCGCATCCGCCTGAAG

GACGAGCGCAGCGGCAAGGAAGACGATTTCTCCGGCGCCGGCGGCGTGCAGGGTTTCGTC  
GAATTCATCAACAAGGGCAAGACCATCCTGCACCCACGCCCTTCTACGCCGCGGGCGAG  
AAGCCGCGCGAGACGTACGGCGGCATCCCCGGCACGCACATCGGCGTGGAAGTGTGCATG  
CAGTGGAACAGCGGCTACACCGAGCAGGTGCTCTGTTTCACCAACAACATCCCGCAGCGC  
GACGGCGGCACCCACCTGACCGGCCTGCGCGCCGCGATGACCCGGATCATCAACAAGTAC  
ATCGAAGAAAACGAGCTGGCCAAGAAGGCCAAGGTGAGGTAACCGGCGACGACATGCGC  
GAAGAAGAGGACATGGCCAAGCGCCGTTTCGCGCCTGAAGGCGTTGATCACGCTCGGCAAG  
ACCCGCGGCTACCTGACGCAGGTCGAGATCTCCGACCACCTGCCCAGACAAGCTGGTCGAC  
GCCGAGACGATGGAAGTCGTGATCGCCATGTTGAACGACATGGGCATCGCGGTCTACGAG  
CAGACGCCCCGACGCCGAGACGCTGTTCCAGAACAACGTCACCCCCACCGCCGCCACTGTC  
GAGGAAGCCGAGGAAGAAGCCGAGGCCGCGCTCTCCACCGTCGACAGCGAATTTCGGCCGC  
ACCACCGACCCGGTCCGCATGTACATGCGCGAAATGGGCACCGTCGAGCTGCTGACCCGC  
GAAGGCGAGATCGAGATCGCCAAGCGCATCGAAGGCGGCCTGCAGGCCATGATGGAGGCG  
ATCAGCGCGTCGCCCCGCCACCATCGCCGCGATCCTGGTGATGGGCGAGGACATCCGCGAA  
GGCAAGGTCGTATCTCGACCATCGTCGACGGCTTCTCCAACCCCAACGAAGCCGACGAC  
TACGTGGCCGAGGAGGACTTCGACGAGTTCGACGAGGAAGACGACGACGACGGAAGGGC  
GGCTCCAAGGCGCTGACCAAGAAGCTGGAAGAATTGAAGCGCGAGGCGCTGTTCGCGCTTC  
GAC

>CFBP1801 *Xylophilus ampelinus*

CACGCCGGCGGCAAGTTCAACCAGAACAGCTACAAGGTCTCGGGCGGCCTGCACGGCGTG  
GGCGTGAGTTGCGTCAACGCGCTCAGCAAGATGCTGCGCCTGACGGTGCGGCGCGACGGC  
AAGGTCCACGTGCTGGAGTTCAGCAAGGGCTTCGTGCAGAACCGCATCGTCGAGCAGGCG  
GGCGGCGTCGAGGTCTCGCCGATGCGCATCATGGGCGACACCGAGAAGCGCGGTACCGAG  
GTGCACTTCCTGCCCCGACAACGAGATCTTCAAGGAAAACGCCGATTTCCACTACGAGATC  
CTGGCCAAGCGCCTGCGCGAACTGAGCTTCCTGAACAACGGCGTGCGCATCCGCCTGAAG  
GACGAGCGCAGCGGCAAGGAAGACGATTTCTCCGGCGCCGGCGGCGTGCAGGGTTTCGTC  
GAATTCATCAACAAGGGCAAGACCATCCTGCACCCACGCCCTTCTACGCCGCGGGCGAG  
AAGCCGCGCGAGACGTACGGCGGCATCCCCGGCACGCACATCGGCGTGGAAGTGTGCATG  
CAGTGGAACAGCGGCTACACCGAGCAGGTGCTCTGTTTCACCAACAACATCCCGCAGCGC  
GACGGCGGCACCCACCTGACCGGCCTGCGCGCCGCGATGACCCGGATCATCAACAAGTAC  
ATCGAAGAAAACGAGCTGGCCAAGAAGGCCAAGGTGAGGTAACCGGCGACGACATGCGC  
GAAGAAGAGGACATGGCCAAGCGCCGTTTCGCGCCTGAAGGCGTTGATCACGCTCGGCAAG  
ACCCGCGGCTACCTGACGCAGGTCGAGATCTCCGACCACCTGCCCAGACAAGCTGGTCGAC  
GCCGAGACGATGGAAGTCGTGATCGCCATGTTGAACGACATGGGCATCGCGGTCTACGAG  
CAGACGCCCCGACGCCGAGACGCTGTTCCAGAACAACGTCACCCCCACCGCCGCCACTGTC  
GAGGAAGCCGAGGAAGAAGCCGAGGCCGCGCTCTCCACCGTCGACAGCGAATTTCGGCCGC  
ACCACCGACCCGGTCCGCATGTACATGCGCGAAATGGGCACCGTCGAGCTGCTGACCCGC  
GAAGGCGAGATCGAGATCGCCAAGCGCATCGAAGGCGGCCTGCAGGCCATGATGGAGGCG  
ATCAGCGCGTCGCCCCGCCACCATCGCCGCGATCCTGGTGATGGGCGAGGACATCCGCGAA  
GGCAAGGTCGTATCTCGACCATCGTCGACGGCTTCTCCAACCCCAACGAAGCCGACGAC  
TACGTGGCCGAGGAGGACTTCGACGAGTTCGACGAGGAAGACGACGACGACGGAAGGGC  
GGCTCCAAGGCGCTGACCAAGAAGCTGGAAGAATTGAAGCGCGAGGCGCTGTTCGCGCTTC  
GAC

>CFBP1802 *Xylophilus ampelinus*

CACGCCGGCGGCAAGTTCAACCAGAACAGCTACAAGGTCTCGGGCGGCCTGCACGGCGTG  
GGCGTGAGTTGCGTCAACGCGCTCAGCAAGATGCTGCGCCTGACGGTGCGGCGCGACGGC  
AAGGTCCACGTGCTGGAGTTCAGCAAGGGCTTCGTGCAGAACCGCATCGTCGAGCAGGCG  
GGCGGCGTCGAGGTCTCGCCGATGCGCATCATGGGCGACACCGAGAAGCGCGGTACCGAG  
GTGCACTTCCTGCCCCGACAACGAGATCTTCAAGGAAAACGCCGATTTCCACTACGAGATC  
CTGGCCAAGCGCCTGCGCGAACTGAGCTTCCTGAACAACGGCGTGCGCATCCGCCTGAAG  
GACGAGCGCAGCGGCAAGGAAGACGATTTCTCCGGCGCCGGCGGCGTGCAGGGTTTCGTC  
GAATTCATCAACAAGGGCAAGACCATCCTGCACCCACGCCCTTCTACGCCGCGGGCGAG  
AAGCCGCGCGAGACGTACGGCGGCATCCCCGGCACGCACATCGGCGTGGAAGTGTGCATG  
CAGTGGAACAGCGGCTACACCGAGCAGGTGCTCTGTTTCACCAACAACATCCCGCAGCGC  
GACGGCGGCACCCACCTGACCGGCCTGCGCGCCGCGATGACCCGGATCATCAACAAGTAC  
ATCGAAGAAAACGAGCTGGCCAAGAAGGCCAAGGTGAGGTAACCGGCGACGACATGCGC  
GAAGAAGAGGACATGGCCAAGCGCCGTTTCGCGCCTGAAGGCGTTGATCACGCTCGGCAAG  
ACCCGCGGCTACCTGACGCAGGTCGAGATCTCCGACCACCTGCCCAGACAAGCTGGTCGAC

GCCGAGACGATGGAAGTCGTGATCGCCATGTTGAACGACATGGGCATCGCGGTCTACGAG  
CAGACGCCCCGACGCCGAGACGCTGTTCCAGAACAACGTCACCCCCACCGCCGCCACTGTC  
GAGGAAGCCGAGGAAGAAGCCGAGGCCGCGCTCTCCACCGTCGACAGCGAATTTCGGCCGC  
ACCACCGACCCGGTCCGCATGTACATGCGCGAAATGGGCACCGTCGAGCTGCTGACCCGC  
GAAGGCGAGATCGAGATCGCCAAGCGCATCGAAGGCGGCCTGCAGGCCATGATGGAGGCG  
ATCAGCGCGTCGCCCCGCCACCATCGCCGCGATCCTGGTGATGGGCGAGGACATCCGCGAA  
GGCAAGGTCGTTCATCTCGACCATCGTCGACGGCTTCTCCAACCCCAACGAAGCCGACGAC  
TACGTGGCCGAGGAGGACTTCGACGAGTTCGACGAGGAAGACGACGACGACGCGCAAGGGC  
GGCTCCAAGGCGCTGACCAAGAAGCTGGAAGAATTGAAGCGCGAGGCGCTGTTCGCGCTTC  
GAC

>CFBP1803 *Xylophilus ampelinus*

CACGCCGGCGGCAAGTTCAACCAGAACAGCTACAAGGTCTCGGGCGGCCTGCACGGCGTG  
GGCGTGAGTTGCGTCAACGCGCTCAGCAAGATGCTGCGCCTGACGGTGCGGCGCGACGGC  
AAGGTCCACGTGCTGGAGTTCAGCAAGGGCTTCGTGCAGAACCGCATCGTCGAGCAGGCG  
GGCGGCGTCGAGGTCTCGCCGATGCGCATCATGGGCGACACCGAGAAGCGCGGTACCGAG  
GTGCACTTCTGCCCCGACAACGAGATCTTCAAGGAAAACGCCGATTTCCACTACGAGATC  
CTGGCCAAGCGCCTGCGCGAACTGAGCTTCTGAACAACGGCGTGCGCATCCGCCTGAAG  
GACGAGCGCAGCGGCAAGGAAGACGATTTCTCCGGCGCCGGCGGCGTGAGGGTTTCGTCTC  
GAATTCATCAACAAGGGCAAGACCATCCTGCACCCACGCCCTTCTACGCCGCGGGCGAG  
AAGCCGGCCGAGACGTACGGCGGCATCCCCGGCACGCACATCGGCGTGGAAGTGTTCGATG  
CAGTGGAACAGCGGCTACACCGAGCAGGTGCTCTGTTTACCAACAACATCCCGCAGCGC  
GACGGCGGCACCCACCTGACCGGCTGCGCGCCGCGATGACCCGGATCATCAACAAGTAC  
ATCGAAGAAAACGAGCTGGCCAAGAAGGCCAAGGTCGAGGTAACCGGCGACGACATGCGC  
GAAGAAGAGGACATGGCCAAGCGCCGTTTCGCGCCTGAAGGCGTTGATCACGCTCGGCAAG  
ACCCGCGGCTACCTGACGCAGGTCGAGATCTCCGACCACCTGCCCCGACAAGCTGGTCGAC  
GCCGAGACGATGGAAGTCGTGATCGCCATGTTGAACGACATGGGCATCGCGGTCTACGAG  
CAGACGCCCCGACGCCGAGACGCTGTTCCAGAACAACGTCACCCCCACCGCCGCCACTGTC  
GAGGAAGCCGAGGAAGAAGCCGAGGCCGCGCTCTCCACCGTCGACAGCGAATTTCGGCCGC  
ACCACCGACCCGGTCCGCATGTACATGCGCGAAATGGGCACCGTCGAGCTGCTGACCCGC  
GAAGGCGAGATCGAGATCGCCAAGCGCATCGAAGGCGGCCTGCAGGCCATGATGGAGGCG  
ATCAGCGCGTCGCCCCGCCACCATCGCCGCGATCCTGGTGATGGGCGAGGACATCCGCGAA  
GGCAAGGTCGTTCATCTCGACCATCGTCGACGGCTTCTCCAACCCCAACGAAGCCGACGAC  
TACGTGGCCGAGGAGGACTTCGACGAGTTCGACGAGGAAGACGACGACGACGCGCAAGGGC  
GGCTCCAAGGCGCTGACCAAGAAGCTGGAAGAATTGAAGCGCGAGGCGCTGTTCGCGCTTC  
GAC

>CFBP1833 *Xylophilus ampelinus*

CACGCCGGCGGCAAGTTCAACCAGAACAGCTACAAGGTCTCGGGCGGCCTGCACGGCGTG  
GGCGTGAGTTGCGTCAACGCGCTCAGCAAGATGCTGCGCCTGACGGTGCGGCGCGACGGC  
AAGGTCCACGTGCTGGAGTTCAGCAAGGGCTTCGTGCAGAACCGCATCGTCGAGCAGGCG  
GGCGGCGTCGAGGTCTCGCCGATGCGCATCATGGGCGACACCGAGAAGCGCGGTACCGAG  
GTGCACTTCTGCCCCGACAACGAGATCTTCAAGGAAAACGCCGATTTCCACTACGAGATC  
CTGGCCAAGCGCCTGCGCGAACTGAGCTTCTGAACAACGGCGTGCGCATCCGCCTGAAG  
GACGAGCGCAGCGGCAAGGAAGACGATTTCTCCGGCGCCGGCGGCGTGAGGGTTTCGTCTC  
GAATTCATCAACAAGGGCAAGACCATCCTGCACCCACGCCCTTCTACGCCGCGGGCGAG  
AAGCCGGCCGAGACGTACGGCGGCATCCCCGGCACGCACATCGGCGTGGAAGTGTTCGATG  
CAGTGGAACAGCGGCTACACCGAGCAGGTGCTCTGTTTACCAACAACATCCCGCAGCGC  
GACGGCGGCACCCACCTGACCGGCTGCGCGCCGCGATGACCCGGATCATCAACAAGTAC  
ATCGAAGAAAACGAGCTGGCCAAGAAGGCCAAGGTCGAGGTAACCGGCGACGACATGCGC  
GAAGAAGAGGACATGGCCAAGCGCCGTTTCGCGCCTGAAGGCGTTGATCACGCTCGGCAAG  
ACCCGCGGCTACCTGACGCAGGTCGAGATCTCCGACCACCTGCCCCGACAAGCTGGTCGAC  
GCCGAGACGATGGAAGTCGTGATCGCCATGTTGAACGACATGGGCATCGCGGTCTACGAG  
CAGACGCCCCGACGCCGAGACGCTGTTCCAGAACAACGTCACCCCCACCGCCGCCACTGTC  
GAGGAAGCCGAGGAAGAAGCCGAGGCCGCGCTCTCCACCGTCGACAGCGAATTTCGGCCGC  
ACCACCGACCCGGTCCGCATGTACATGCGCGAAATGGGCACCGTCGAGCTGCTGACCCGC  
GAAGGCGAGATCGAGATCGCCAAGCGCATCGAAGGCGGCCTGCAGGCCATGATGGAGGCG  
ATCAGCGCGTCGCCCCGCCACCATCGCCGCGATCCTGGTGATGGGCGAGGACATCCGCGAA  
GGCAAGGTCGTTCATCTCGACCATCGTCGACGGCTTCTCCAACCCCAACGAAGCCGACGAC  
TACGTGGCCGAGGAGGACTTCGACGAGTTCGACGAGGAAGACGACGACGACGCGCAAGGGC

GGCTCCAAGGCGCTGACCAAGAAGCTGGAAGAATTGAAGCGCGAGGCGCTGTTCGCGCTTC  
GAC

>CFBP1834 *Xylophilus ampelinus*

CACGCCGGCGGCAAGTTCAACCAGAACAGCTACAAGGTCTCGGGCGGCCTGCACGGCGTG  
GGCGTGAGTTGCGTCAACGCGCTCAGCAAGATGCTGCGCCTGACGGTGCGGCGCGACGGC  
AAGGTCCACGTGCTGGAGTTCAGCAAGGGCTTCGTGCAGAACCGCATCGTCGAGCAGGCG  
GGCGGCGTCGAGGTCTCGCCGATGCGCATCATGGGCGACACCGAGAAGCGCGGTACCGAG  
GTGCACTTCCTGCCCAGAACGAGATCTTCAAGGAAAACGCCGATTTCCACTACGAGATC  
CTGGCCAAGCGCCTGCGCGAACTGAGCTTCTGAACAACGGCGTGCGCATCCGCCTGAAG  
GACGAGCGCAGCGGCAAGGAAGACGATTTCTCCGGCGCCGGCGGCGTGACAGGGTTTCGT  
GAATTCATCAACAAGGGCAAGACCATCCTGCACCCACGCCCTTCTACGCCGCGGGCGAG  
AAGCCGGCCGAGACGTACGGCGGCATCCCCGGCACGCACATCGGCGTGGAAGTGTTCGATG  
CAGTGGAACAGCGGCTACACCGAGCAGGTGCTCTGTTTCACCAACAACATCCCGCAGCGC  
GACGGCGGCACCCACCTGACCGGCCTGCGCGCCGCGATGACCCGGATCATCAACAAGTAC  
ATCGAAGAAAACGAGCTGGCCAAGAAGGCCAAGGTTCGAGGTAACCGGCGACGACATGCGC  
GAAGAAGAGGACATGGCCAAGCGCCGTTTCGCGCCTGAAGGCGTTGATCACGCTCGGCAAG  
ACCCGCGGCTACCTGACGCAGGTTCGAGATCTCCGACCACCTGCCCGACAAGCTGGTTCGAC  
GCCGAGACGATGGAAGTTCGTGATCGCCATGTTGAACGACATGGGCATCGCGGTCTACGAG  
CAGACGCCCCGACGCCGAGACGCTGTTCCAGAACAACGTCACCCCCACCGCCGCCACTGTC  
GAGGAAGCCGAGGAAGAAGCCGAGGCCGCGCTCTCCACCGTCGACAGCGAATTTCGGCCGC  
ACCACCGACCCGGTCCGCATGTACATGCGCGAAATGGGCACCGTCGAGCTGCTGACCCGC  
GAAGGCGAGATCGAGATCGCCAAGCGCATCGAAGGCGGCCTGCAGGCCATGATGGAGGCG  
ATCAGCGCGTCGCCCCGCCACCATCGCCGCGATCCTGGTGATGGGCGAGGACATCCGCGAA  
GGCAAGGTCGTATCTCGACCATCGTCGACGGCTTCTCCAACCCCAACGAAGCCGACGAC  
TACGTGGCCGAGGAGGACTTCGACGAGTTCGACGAGGAAGACGACGACGACGGAAGGGC  
GGCTCCAAGGCGCTGACCAAGAAGCTGGAAGAATTGAAGCGCGAGGCGCTGTTCGCGCTTC  
GAC

>CFBP1835 *Xylophilus ampelinus*

CACGCCGGCGGCAAGTTCAACCAGAACAGCTACAAGGTCTCGGGCGGCCTGCACGGCGTG  
GGCGTGAGTTGCGTCAACGCGCTCAGCAAGATGCTGCGCCTGACGGTGCGGCGCGACGGC  
AAGGTCCACGTGCTGGAGTTCAGCAAGGGCTTCGTGCAGAACCGCATCGTCGAGCAGGCG  
GGCGGCGTCGAGGTCTCGCCGATGCGCATCATGGGCGACACCGAGAAGCGCGGTACCGAG  
GTGCACTTCCTGCCCAGAACGAGATCTTCAAGGAAAACGCCGATTTCCACTACGAGATC  
CTGGCCAAGCGCCTGCGCGAACTGAGCTTCTGAACAACGGCGTGCGCATCCGCCTGAAG  
GACGAGCGCAGCGGCAAGGAAGACGATTTCTCCGGCGCCGGCGGCGTGACAGGGTTTCGT  
GAATTCATCAACAAGGGCAAGACCATCCTGCACCCACGCCCTTCTACGCCGCGGGCGAG  
AAGCCGGCCGAGACGTACGGCGGCATCCCCGGCACGCACATCGGCGTGGAAGTGTTCGATG  
CAGTGGAACAGCGGCTACACCGAGCAGGTGCTCTGTTTCACCAACAACATCCCGCAGCGC  
GACGGCGGCACCCACCTGACCGGCCTGCGCGCCGCGATGACCCGGATCATCAACAAGTAC  
ATCGAAGAAAACGAGCTGGCCAAGAAGGCCAAGGTTCGAGGTAACCGGCGACGACATGCGC  
GAAGAAGAGGACATGGCCAAGCGCCGTTTCGCGCCTGAAGGCGTTGATCACGCTCGGCAAG  
ACCCGCGGCTACCTGACGCAGGTTCGAGATCTCCGACCACCTGCCCGACAAGCTGGTTCGAC  
GCCGAGACGATGGAAGTTCGTGATCGCCATGTTGAACGACATGGGCATCGCGGTCTACGAG  
CAGACGCCCCGACGCCGAGACGCTGTTCCAGAACAACGTCACCCCCACCGCCGCCACTGTC  
GAGGAAGCCGAGGAAGAAGCCGAGGCCGCGCTCTCCACCGTCGACAGCGAATTTCGGCCGC  
ACCACCGACCCGGTCCGCATGTACATGCGCGAAATGGGCACCGTCGAGCTGCTGACCCGC  
GAAGGCGAGATCGAGATCGCCAAGCGCATCGAAGGCGGCCTGCAGGCCATGATGGAGGCG  
ATCAGCGCGTCGCCCCGCCACCATCGCCGCGATCCTGGTGATGGGCGAGGACATCCGCGAA  
GGCAAGGTCGTATCTCGACCATCGTCGACGGCTTCTCCAACCCCAACGAAGCCGACGAC  
TACGTGGCCGAGGAGGACTTCGACGAGTTCGACGAGGAAGACGACGACGACGGAAGGGC  
GGCTCCAAGGCGCTGACCAAGAAGCTGGAAGAATTGAAGCGCGAGGCGCTGTTCGCGCTTC  
GAC

>CFBP1836 *Xylophilus ampelinus*

CACGCCGGCGGCAAGTTCAACCAGAACAGCTACAAGGTCTCGGGCGGCCTGCACGGCGTG  
GGCGTGAGTTGCGTCAACGCGCTCAGCAAGATGCTGCGCCTGACGGTGCGGCGCGACGGC  
AAGGTCCACGTGCTGGAGTTCAGCAAGGGCTTCGTGCAGAACCGCATCGTCGAGCAGGCG  
GGCGGCGTCGAGGTCTCGCCGATGCGCATCATGGGCGACACCGAGAAGCGCGGTACCGAG  
GTGCACTTCCTGCCCAGAACGAGATCTTCAAGGAAAACGCCGATTTCCACTACGAGATC



CTGGCCAAGCGCCTGCGCGAACTGAGCTTCTGAAACAACGGCGTGCGCATCCGCCTGAAG  
GACGAGCGCAGCGGCAAGGAAGACGATTTCTCCGGCGCCGGCGGCGTGAGGGTTTCGTC  
GAATTCATCAACAAGGGCAAGACCATCCTGCACCCACGCCCTTCTACGCCGCGGGCGAG  
AAGCCGCGCGAGACGTACGGCGGCATCCCCGGCAGCACATCGGCGTGGAAGTGTGATG  
CAGTGGAACAGCGGCTACACCGAGCAGGTGCTCTGTTTCACCAACAACATCCCGCAGCGC  
GACGGCGGCACCCACCTGACCGGCCTGCGCGCCGCGATGACCCGGATCATCAACAAGTAC  
ATCGAAGAAAACGAGCTGGCCAAGAAGGCCAAGGTGAGGTAACCGGCGACGACATGCGC  
GAAGAAGAGGACATGGCCAAGCGCCGTTTCGCGCCTGAAGGCGTTGATCACGCTCGGCAAG  
ACCCGCGGCTACCTGACGCAGGTCGAGATCTCCGACCACCTGCCCCACAAGCTGGTTCGAC  
GCCGAGACGATGGAAGTCGTGATCGCCATGTTGAACGACATGGGCATCGCGGTCTACGAG  
CAGACGCCCCGACGCCGAGACGCTGTTCCAGAACAACGTCACCCCCACCGCCGCCACTGTC  
GAGGAAGCCGAGGAAGAAGCCGAGGCCGCGCTCTCCACCGTCGACAGCGAATTTCGGCCGC  
ACCACCGACCCGGTCCGCATGTACATGCGCGAAATGGGCACCGTCGAGCTGCTGACCCGC  
GAAGGCGAGATCGAGATCGCCAAGCGCATCGAAGGCGGCCTGCAGGCCATGATGGAGGCG  
ATCAGCGCGTCGCCCCGCCACCATCGCCGCGATCCTGGTGATGGGCGAGGACATCCGCGAA  
GGCAAGGTCGTATCTCGACCATCGTCGACGGCTTCTCCAACCCCAACGAAGCCGACGAC  
TACGTGGCCGAGGAGGACTTCGACGAGTTCGACGAGGAAGACGACGACGACGGAAGGGC  
GGCTCCAAGGCGCTGACCAAGAAGCTGGAAGAATTGAAGCGCGAGGCGCTGTTCGCGCTTC  
GAC

>CFBP1837 *Xylophilus ampelinus*

CACGCCGGCGGCAAGTTCAACCAGAACAGCTACAAGGTCTCGGGCGGCCTGCACGGCGTG  
GGCGTGAGTTGCGTCAACGCGCTCAGCAAGATGCTGCGCCTGACGGTGCGGCGCGACGGC  
AAGGTCCACGTGCTGGAGTTCAGCAAGGGCTTCGTGCAGAACCGCATCGTCGAGCAGGCG  
GGCGGCGTCGAGGTCTCGCCGATGCGCATCATGGGCGACACCGAGAAGCGCGGTACCGAG  
GTGCACTTCTGCCCCACAACGAGATCTTCAAGGAAAACGCCGATTTCCACTACGAGATC  
CTGGCCAAGCGCCTGCGCGAACTGAGCTTCTGAAACAACGGCGTGCGCATCCGCCTGAAG  
GACGAGCGCAGCGGCAAGGAAGACGATTTCTCCGGCGCCGGCGGCGTGAGGGTTTCGTC  
GAATTCATCAACAAGGGCAAGACCATCCTGCACCCACGCCCTTCTACGCCGCGGGCGAG  
AAGCCGCGCGAGACGTACGGCGGCATCCCCGGCAGCACATCGGCGTGGAAGTGTGATG  
CAGTGGAACAGCGGCTACACCGAGCAGGTGCTCTGTTTCACCAACAACATCCCGCAGCGC  
GACGGCGGCACCCACCTGACCGGCCTGCGCGCCGCGATGACCCGGATCATCAACAAGTAC  
ATCGAAGAAAACGAGCTGGCCAAGAAGGCCAAGGTGAGGTAACCGGCGACGACATGCGC  
GAAGAAGAGGACATGGCCAAGCGCCGTTTCGCGCCTGAAGGCGTTGATCACGCTCGGCAAG  
ACCCGCGGCTACCTGACGCAGGTCGAGATCTCCGACCACCTGCCCCACAAGCTGGTTCGAC  
GCCGAGACGATGGAAGTCGTGATCGCCATGTTGAACGACATGGGCATCGCGGTCTACGAG  
CAGACGCCCCGACGCCGAGACGCTGTTCCAGAACAACGTCACCCCCACCGCCGCCACTGTC  
GAGGAAGCCGAGGAAGAAGCCGAGGCCGCGCTCTCCACCGTCGACAGCGAATTTCGGCCGC  
ACCACCGACCCGGTCCGCATGTACATGCGCGAAATGGGCACCGTCGAGCTGCTGACCCGC  
GAAGGCGAGATCGAGATCGCCAAGCGCATCGAAGGCGGCCTGCAGGCCATGATGGAGGCG  
ATCAGCGCGTCGCCCCGCCACCATCGCCGCGATCCTGGTGATGGGCGAGGACATCCGCGAA  
GGCAAGGTCGTATCTCGACCATCGTCGACGGCTTCTCCAACCCCAACGAAGCCGACGAC  
TACGTGGCCGAGGAGGACTTCGACGAGTTCGACGAGGAAGACGACGACGACGGAAGGGC  
GGCTCCAAGGCGCTGACCAAGAAGCTGGAAGAATTGAAGCGCGAGGCGCTGTTCGCGCTTC  
GAC

>CFBP1841 *Xylophilus ampelinus*

CACGCCGGCGGCAAGTTCAACCAGAACAGCTACAAGGTCTCGGGCGGCCTGCACGGCGTG  
GGCGTGAGTTGCGTCAACGCGCTCAGCAAGATGCTGCGCCTGACGGTGCGGCGCGACGGC  
AAGGTCCACGTGCTGGAGTTCAGCAAGGGCTTCGTGCAGAACCGCATCGTCGAGCAGGCG  
GGCGGCGTCGAGGTCTCGCCGATGCGCATCATGGGCGACACCGAGAAGCGCGGTACCGAG  
GTGCACTTCTGCCCCACAACGAGATCTTCAAGGAAAACGCCGATTTCCACTACGAGATC  
CTGGCCAAGCGCCTGCGCGAACTGAGCTTCTGAAACAACGGCGTGCGCATCCGCCTGAAG  
GACGAGCGCAGCGGCAAGGAAGACGATTTCTCCGGCGCCGGCGGCGTGAGGGTTTCGTC  
GAATTCATCAACAAGGGCAAGACCATCCTGCACCCACGCCCTTCTACGCCGCGGGCGAG  
AAGCCGCGCGAGACGTACGGCGGCATCCCCGGCAGCACATCGGCGTGGAAGTGTGATG  
CAGTGGAACAGCGGCTACACCGAGCAGGTGCTCTGTTTCACCAACAACATCCCGCAGCGC  
GACGGCGGCACCCACCTGACCGGCCTGCGCGCCGCGATGACCCGGATCATCAACAAGTAC  
ATCGAAGAAAACGAGCTGGCCAAGAAGGCCAAGGTGAGGTAACCGGCGACGACATGCGC  
GAAGAAGAGGACATGGCCAAGCGCCGTTTCGCGCCTGAAGGCGTTGATCACGCTCGGCAAG

ACCCGCGGCTACCTGACGCAGGTCGAGATCTCCGACCACCTGCCCCGACAAGCTGGTTCGAC  
GCCGAGACGATGGAAGTCGTGATCGCCATGTTGAACGACATGGGCATCGCGGTCTACGAG  
CAGACGCCCCGACGCCGAGACGCTGTTCCAGAACAACGTCACCCCCACCGCCGCCACTGTC  
GAGGAAGCCGAGGAAGAAGCCGAGGCCGCGCTCTCCACCGTCGACAGCGAATTTCGGCCGC  
ACCACCGACCCGGTCCGCATGTACATGCGCGAAATGGGCACCGTCGAGCTGCTGACCCGC  
GAAGGCGAGATCGAGATCGCCAAGCGCATCGAAGGCGGCCTGCAGGCCATGATGGAGGCG  
ATCAGCGCGTCGCCCCGCCACCATCGCCGCGATCCTGGTGATGGGCGAGGACATCCGCGAA  
GGCAAGGTCGTTCATCTCGACCATCGTCGACGGCTTCTCCAACCCCAACGAAGCCGACGAC  
TACGTGGCCGAGGAGGACTTCGACGAGTTCGACGAGGAAGACGACGACGACGGAAGGGC  
GGCTCCAAGGCGCTGACCAAGAAGCTGGAAGAATTGAAGCGCGAGGCGCTGTTCGCGCTTC  
GAC

>CFBP1842 *Xylophilus ampelinus*

CACGCCGGCGGCAAGTTCAACCAGAACAGCTACAAGGTCTCGGGCGGCCTGCACGGCGTG  
GGCGTGAGTTGCGTCAACGCGCTCAGCAAGATGCTGCGCCTGACGGTGCGGCGCGACGGC  
AAGGTCCACGTGCTGGAGTTCAGCAAGGGCTTCGTGCAGAACCGCATCGTCGAGCAGGCG  
GGCGGCGTCGAGGTCTCGCCGATGCGCATCATGGGCGACACCGAGAAGCGCGGTACCGAG  
GTGCACTTCCTGCCCCGACAACGAGATCTTCAAGGAAAACGCCGATTTCCACTACGAGATC  
CTGGCCAAGCGCCTGCGCGAACTGAGCTTCCTGAACAACGGCGTGCGCATCCGCCTGAAG  
GACGAGCGCAGCGGCAAGGAAGACGATTTCTCCGGCGCCGGCGGCGTGAGGGTTTCGTTC  
GAATTCATCAACAAGGGCAAGACCATCCTGCACCCACGCCCTTCTACGCCGCGGGCGAG  
AAGCCGGCCGAGACGTACGGCGGCATCCCCGGCACGCACATCGGCGTGGAAGTGTTCGATG  
CAGTGGAACAGCGGCTACACCGAGCAGGTGCTCTGTTTCACCAACAACATCCCGCAGCGC  
GACGGCGGCACCCACCTGACCGGCTGCGCGCCGCGATGACCCGGATCATCAACAAGTAC  
ATCGAAGAAAACGAGCTGGCCAAGAAGGCCAAGGTTCGAGGTAACCGGCGACGACATGCGC  
GAAGAAGAGGACATGGCCAAGCGCCGTTTCGCGCCTGAAGGCGTTGATCACGCTCGGCAAG  
ACCCGCGGCTACCTGACGCAGGTCGAGATCTCCGACCACCTGCCCCGACAAGCTGGTTCGAC  
GCCGAGACGATGGAAGTCGTGATCGCCATGTTGAACGACATGGGCATCGCGGTCTACGAG  
CAGACGCCCCGACGCCGAGACGCTGTTCCAGAACAACGTCACCCCCACCGCCGCCACTGTC  
GAGGAAGCCGAGGAAGAAGCCGAGGCCGCGCTCTCCACCGTCGACAGCGAATTTCGGCCGC  
ACCACCGACCCGGTCCGCATGTACATGCGCGAAATGGGCACCGTCGAGCTGCTGACCCGC  
GAAGGCGAGATCGAGATCGCCAAGCGCATCGAAGGCGGCCTGCAGGCCATGATGGAGGCG  
ATCAGCGCGTCGCCCCGCCACCATCGCCGCGATCCTGGTGATGGGCGAGGACATCCGCGAA  
GGCAAGGTCGTTCATCTCGACCATCGTCGACGGCTTCTCCAACCCCAACGAAGCCGACGAC  
TACGTGGCCGAGGAGGACTTCGACGAGTTCGACGAGGAAGACGACGACGACGGAAGGGC  
GGCTCCAAGGCGCTGACCAAGAAGCTGGAAGAATTGAAGCGCGAGGCGCTGTTCGCGCTTC  
GAC

>CFBP1927 *Xylophilus ampelinus*

CACGCCGGCGGCAAGTTCAACCAGAACAGCTACAAGGTCTCGGGCGGCCTGCACGGCGTG  
GGCGTGAGTTGCGTCAACGCGCTCAGCAAGATGCTGCGCCTGACGGTGCGGCGCGACGGC  
AAGGTCCACGTGCTGGAGTTCAGCAAGGGCTTCGTGCAGAACCGCATCGTCGAGCAGGCG  
GGCGGCGTCGAGGTCTCGCCGATGCGCATCATGGGCGACACCGAGAAGCGCGGTACCGAG  
GTGCACTTCCTGCCCCGACAACGAGATCTTCAAGGAAAACGCCGATTTCCACTACGAGATC  
CTGGCCAAGCGCCTGCGCGAACTGAGCTTCCTGAACAACGGCGTGCGCATCCGCCTGAAG  
GACGAGCGCAGCGGCAAGGAAGACGATTTCTCCGGCGCCGGCGGCGTGAGGGTTTCGTTC  
GAATTCATCAACAAGGGCAAGACCATCCTGCACCCACGCCCTTCTACGCCGCGGGCGAG  
AAGCCGGCCGAGACGTACGGCGGCATCCCCGGCACGCACATCGGCGTGGAAGTGTTCGATG  
CAGTGGAACAGCGGCTACACCGAGCAGGTGCTCTGTTTCACCAACAACATCCCGCAGCGC  
GACGGCGGCACCCACCTGACCGGCTGCGCGCCGCGATGACCCGGATCATCAACAAGTAC  
ATCGAAGAAAACGAGCTGGCCAAGAAGGCCAAGGTTCGAGGTAACCGGCGACGACATGCGC  
GAAGAAGAGGACATGGCCAAGCGCCGTTTCGCGCCTGAAGGCGTTGATCACGCTCGGCAAG  
ACCCGCGGCTACCTGACGCAGGTCGAGATCTCCGACCACCTGCCCCGACAAGCTGGTTCGAC  
GCCGAGACGATGGAAGTCGTGATCGCCATGTTGAACGACATGGGCATCGCGGTCTACGAG  
CAGACGCCCCGACGCCGAGACGCTGTTCCAGAACAACGTCACCCCCACCGCCGCCACTGTC  
GAGGAAGCCGAGGAAGAAGCCGAGGCCGCGCTCTCCACCGTCGACAGCGAATTTCGGCCGC  
ACCACCGACCCGGTCCGCATGTACATGCGCGAAATGGGCACCGTCGAGCTGCTGACCCGC  
GAAGGCGAGATCGAGATCGCCAAGCGCATCGAAGGCGGCCTGCAGGCCATGATGGAGGCG  
ATCAGCGCGTCGCCCCGCCACCATCGCCGCGATCCTGGTGATGGGCGAGGACATCCGCGAA  
GGCAAGGTCGTTCATCTCGACCATCGTCGACGGCTTCTCCAACCCCAACGAAGCCGACGAC

TACGTGGCCGAGGAGGACTTCGACGAGTTCGACGAGGAAGACGACGACGACGGCAAGGGC  
GGCTCCAAGGCGCTGACCAAGAAGCTGGAAGAATTGAAGCGCGAGGCGCTGTTCGCGCTTC  
GAC

>CFBP1928 *Xylophilus ampelinus*

CACGCCGGCGGCAAGTTCAACCAGAACAGCTACAAGGTCTCGGGCGGCCTGCACGGCGTG  
GGCGTGAGTTGCGTCAACGCGCTCAGCAAGATGCTGCGCCTGACGGTGCGGCGCGACGGC  
AAGGTCCACGTGCTGGAGTTCAGCAAGGGCTTCGTGCAGAACCGCATCGTCGAGCAGGCG  
GGCGGCGTCGAGGTCTCGCCGATGCGCATCATGGGCGACACCGAGAAGCGCGGTACCGAG  
GTGCACTTCCTGCCCAGAACGAGATCTTCAAGGAAAACGCCGATTTCCACTACGAGATC  
CTGGCCAAGCGCCTGCGCGAACTGAGCTTCTGAACAACGGCGTGCGCATCCGCCTGAAG  
GACGAGCGCAGCGGCAAGGAAGACGATTTCTCCGGCGCCGGCGGCGTGAGGGTTTTCGTC  
GAATTCATCAACAAGGGCAAGACCATCCTGCACCCACGCCCTTCTACGCCGCGGGCGAG  
AAGCCGGCCGAGACGTACGGCGGCATCCCCGGCACGCACATCGGCGTGGAAGTGTTCGATG  
CAGTGGAACAGCGGCTACACCGAGCAGGTGCTCTGTTTCACCAACAACATCCCGCAGCGC  
GACGGCGGCACCCACCTGACCGGCCTGCGCGCCGCGATGACCCGGATCATCAACAAGTAC  
ATCGAAGAAAACGAGCTGGCCAAGAAGGCCAAGGTTCGAGGTAACCGGCGACGACATGCGC  
GAAGAAGAGGACATGGCCAAGCGCCGTTTCGCGCCTGAAGGCGTTGATCACGCTCGGCAAG  
ACCCGCGGCTACCTGACGCAGGTTCGAGATCTCCGACCACCTGCCCAGAACGCTGGTTCGAC  
GCCGAGACGATGGAAGTTCGTGATCGCCATGTTGAACGACATGGGCATCGCGGTCTACGAG  
CAGACGCCCCGACGCCGAGACGCTGTTCCAGAACACGTCACCCCCACCGCCGCCACTGTC  
GAGGAAGCCGAGGAAGAAGCCGAGGCCGCGCTCTCCACCGTCGACAGCGAATTTCGGCCGC  
ACCACCGACCCGGTCCGCATGTACATGCGCGAAATGGGCACCGTCGAGCTGCTGACCCGC  
GAAGGCGAGATCGAGATCGCCAAGCGCATCGAAGGCGGCCTGCAGGCCATGATGGAGGCG  
ATCAGCGCGTCGCCCCGCCACCATCGCCGCGATCCTGGTGATGGGCGAGGACATCCGCGAA  
GGCAAGGTCGTATCTCGACCATCGTCGACGGCTTCTCCAACCCCAACGAAGCCGACGAC  
TACGTGGCCGAGGAGGACTTCGACGAGTTCGACGAGGAAGACGACGACGACGGCAAGGGC  
GGCTCCAAGGCGCTGACCAAGAAGCTGGAAGAATTGAAGCGCGAGGCGCTGTTCGCGCTTC  
GAC

>CFBP1938 *Xylophilus ampelinus*

CACGCCGGCGGCAAGTTCAACCAGAACAGCTACAAGGTCTCGGGCGGCCTGCACGGCGTG  
GGCGTGAGTTGCGTCAACGCGCTCAGCAAGATGCTGCGCCTGACGGTGCGGCGCGACGGC  
AAGGTCCACGTGCTGGAGTTCAGCAAGGGCTTCGTGCAGAACCGCATCGTCGAGCAGGCG  
GGCGGCGTCGAGGTCTCGCCGATGCGCATCATGGGCGACACCGAGAAGCGCGGTACCGAG  
GTGCACTTCCTGCCCAGAACGAGATCTTCAAGGAAAACGCCGATTTCCACTACGAGATC  
CTGGCCAAGCGCCTGCGCGAACTGAGCTTCTGAACAACGGCGTGCGCATCCGCCTGAAG  
GACGAGCGCAGCGGCAAGGAAGACGATTTCTCCGGCGCCGGCGGCGTGAGGGTTTTCGTC  
GAATTCATCAACAAGGGCAAGACCATCCTGCACCCACGCCCTTCTACGCCGCGGGCGAG  
AAGCCGGCCGAGACGTACGGCGGCATCCCCGGCACGCACATCGGCGTGGAAGTGTTCGATG  
CAGTGGAACAGCGGCTACACCGAGCAGGTGCTCTGTTTCACCAACAACATCCCGCAGCGC  
GACGGCGGCACCCACCTGACCGGCCTGCGCGCCGCGATGACCCGGATCATCAACAAGTAC  
ATCGAAGAAAACGAGCTGGCCAAGAAGGCCAAGGTTCGAGGTAACCGGCGACGACATGCGC  
GAAGAAGAGGACATGGCCAAGCGCCGTTTCGCGCCTGAAGGCGTTGATCACGCTCGGCAAG  
ACCCGCGGCTACCTGACGCAGGTTCGAGATCTCCGACCACCTGCCCAGAACGCTGGTTCGAC  
GCCGAGACGATGGAAGTTCGTGATCGCCATGTTGAACGACATGGGCATCGCGGTCTACGAG  
CAGACGCCCCGACGCCGAGACGCTGTTCCAGAACACGTCACCCCCACCGCCGCCACTGTC  
GAGGAAGCCGAGGAAGAAGCCGAGGCCGCGCTCTCCACCGTCGACAGCGAATTTCGGCCGC  
ACCACCGACCCGGTCCGCATGTACATGCGCGAAATGGGCACCGTCGAGCTGCTGACCCGC  
GAAGGCGAGATCGAGATCGCCAAGCGCATCGAAGGCGGCCTGCAGGCCATGATGGAGGCG  
ATCAGCGCGTCGCCCCGCCACCATCGCCGCGATCCTGGTGATGGGCGAGGACATCCGCGAA  
GGCAAGGTCGTATCTCGACCATCGTCGACGGCTTCTCCAACCCCAACGAAGCCGACGAC  
TACGTGGCCGAGGAGGACTTCGACGAGTTCGACGAGGAAGACGACGACGACGGCAAGGGC  
GGCTCCAAGGCGCTGACCAAGAAGCTGGAAGAATTGAAGCGCGAGGCGCTGTTCGCGCTTC  
GAC

>CFBP1942 *Xylophilus ampelinus*

CACGCCGGCGGCAAGTTCAACCAGAACAGCTACAAGGTCTCGGGCGGCCTGCACGGCGTG  
GGCGTGAGTTGCGTCAACGCGCTCAGCAAGATGCTGCGCCTGACGGTGCGGCGCGACGGC  
AAGGTCCACGTGCTGGAGTTCAGCAAGGGCTTCGTGCAGAACCGCATCGTCGAGCAGGCG  
GGCGGCGTCGAGGTCTCGCCGATGCGCATCATGGGCGACACCGAGAAGCGCGGTACCGAG

GTGCACTTCCTGCCCCGACAACGAGATCTTCAAGGAAAACGCCGATTTCCACTACGAGATC  
CTGGCCAAGCGCCTGCGCGAACTGAGCTTCTGAACAACGGCGTGCGCATCCGCCTGAAG  
GACGAGCGCAGCGGCAAGGAAGACGATTTCTCCGGCGCCGGCGGCGTGCGAGGGTTTCGTC  
GAATTCATCAACAAGGGCAAGACCATCCTGCACCCACGCCCTTCTACGCCGCGGGCGAG  
AAGCCGGCCGAGACGTACGGCGGCATCCCCGGCAGCACATCGGCGTGGAAGTGTTCGATG  
CAGTGGAACAGCGGCTACACCGAGCAGGTGCTCTGTTTCACCAACAACATCCCGCAGCGC  
GACGGCGGCACCCACCTGACCGGCCTGCGCGCCGCGATGACCCGGATCATCAACAAGTAC  
ATCGAAGAAAACGAGCTGGCCAAGAAGGCCAAGGTTCGAGGTAACCGGCGACGACATGCGC  
GAAGAAGAGGACATGGCCAAGCGCCGTTTCGCGCCTGAAGGCGTTGATCACGCTCGGCAAG  
ACCCGCGGCTACCTGACGCAGGTCGAGATCTCCGACCACCTGCCCCGACAAGCTGGTTCGAC  
GCCGAGACGATGGAAGTTCGTGATCGCCATGTTGAACGACATGGGCATCGCGGTCTACGAG  
CAGACGCCCCGACGCCGAGACGCTGTTCCAGAACAACGTCACCCCCACCGCCGCCACTGTC  
GAGGAAGCCGAGGAAGAAGCCGAGGCCGCGCTCTCCACCGTCGACAGCGAATTTCGGCCGC  
ACCACCGACCCGGTCCGCATGTACATGCGCGAAATGGGCACCGTCGAGCTGCTGACCCGC  
GAAGGCGAGATCGAGATCGCCAAGCGCATCGAAGGCGGCCTGCAGGCCATGATGGAGGCG  
ATCAGCGCGTCGCCCCGCCACCATCGCCGCGATCCTGGTGATGGGCGAGGACATCCGCGAA  
GGCAAGGTCGTATCTCGACCATCGTCGACGGCTTCTCCAACCCCAACGAAGCCGACGAC  
TACGTGGCCGAGGAGGACTTCGACGAGTTCGACGAGGAAGACGACGACGACGGAAGGGC  
GGCTCCAAGGCGCTGACCAAGAAGCTGGAAGAATTGAAGCGCGAGGCGCTGTTCGCGCTTC  
GAC

>CFBP2059 *Xylophilus ampelinus*

CACGCCGGCGGCAAGTTCAACCAGAACAGCTACAAGGTCTCGGGCGGCCTGCACGGCGTG  
GGCGTGAGTTGCGTCAACGCGCTCAGCAAGATGCTGCGCCTGACGGTGCGGCGCGACGGC  
AAGGTCCACGTGCTGGAGTTCAGCAAGGGCTTCGTGCAGAACCGCATCGTCGAGCAGGCG  
GGCGGCGTCGAGGTCTCGCCGATGCGCATCATGGGCGACACCGAGAAGCGCGGTACCGAG  
GTGCACTTCCTGCCCCGACAACGAGATCTTCAAGGAAAACGCCGATTTCCACTACGAGATC  
CTGGCCAAGCGCCTGCGCGAACTGAGCTTCTGAACAACGGCGTGCGCATCCGCCTGAAG  
GACGAGCGCAGCGGCAAGGAAGACGATTTCTCCGGCGCCGGCGGCGTGCGAGGGTTTCGTC  
GAATTCATCAACAAGGGCAAGACCATCCTGCACCCACGCCCTTCTACGCCGCGGGCGAG  
AAGCCGGCCGAGACGTACGGCGGCATCCCCGGCAGCACATCGGCGTGGAAGTGTTCGATG  
CAGTGGAACAGCGGCTACACCGAGCAGGTGCTCTGTTTCACCAACAACATCCCGCAGCGC  
GACGGCGGCACCCACCTGACCGGCCTGCGCGCCGCGATGACCCGGATCATCAACAAGTAC  
ATCGAAGAAAACGAGCTGGCCAAGAAGGCCAAGGTTCGAGGTAACCGGCGACGACATGCGC  
GAAGAAGAGGACATGGCCAAGCGCCGTTTCGCGCCTGAAGGCGTTGATCACGCTCGGCAAG  
ACCCGCGGCTACCTGACGCAGGTCGAGATCTCCGACCACCTGCCCCGACAAGCTGGTTCGAC  
GCCGAGACGATGGAAGTTCGTGATCGCCATGTTGAACGACATGGGCATCGCGGTCTACGAG  
CAGACGCCCCGACGCCGAGACGCTGTTCCAGAACAACGTCACCCCCACCGCCGCCACTGTC  
GAGGAAGCCGAGGAAGAAGCCGAGGCCGCGCTCTCCACCGTCGACAGCGAATTTCGGCCGC  
ACCACCGACCCGGTCCGCATGTACATGCGCGAAATGGGCACCGTCGAGCTGCTGACCCGC  
GAAGGCGAGATCGAGATCGCCAAGCGCATCGAAGGCGGCCTGCAGGCCATGATGGAGGCG  
ATCAGCGCGTCGCCCCGCCACCATCGCCGCGATCCTGGTGATGGGCGAGGACATCCGCGAA  
GGCAAGGTCGTATCTCGACCATCGTCGACGGCTTCTCCAACCCCAACGAAGCCGACGAC  
TACGTGGCCGAGGAGGACTTCGACGAGTTCGACGAGGAAGACGACGACGACGGAAGGGC  
GGCTCCAAGGCGCTGACCAAGAAGCTGGAAGAATTGAAGCGCGAGGCGCTGTTCGCGCTTC  
GAC

>CFBP2060 *Xylophilus ampelinus*

CACGCCGGCGGCAAGTTCAACCAGAACAGCTACAAGGTCTCGGGCGGCCTGCACGGCGTG  
GGCGTGAGTTGCGTCAACGCGCTCAGCAAGATGCTGCGCCTGACGGTGCGGCGCGACGGC  
AAGGTCCACGTGCTGGAGTTCAGCAAGGGCTTCGTGCAGAACCGCATCGTCGAGCAGGCG  
GGCGGCGTCGAGGTCTCGCCGATGCGCATCATGGGCGACACCGAGAAGCGCGGTACCGAG  
GTGCACTTCCTGCCCCGACAACGAGATCTTCAAGGAAAACGCCGATTTCCACTACGAGATC  
CTGGCCAAGCGCCTGCGCGAACTGAGCTTCTGAACAACGGCGTGCGCATCCGCCTGAAG  
GACGAGCGCAGCGGCAAGGAAGACGATTTCTCCGGCGCCGGCGGCGTGCGAGGGTTTCGTC  
GAATTCATCAACAAGGGCAAGACCATCCTGCACCCACGCCCTTCTACGCCGCGGGCGAG  
AAGCCGGCCGAGACGTACGGCGGCATCCCCGGCAGCACATCGGCGTGGAAGTGTTCGATG  
CAGTGGAACAGCGGCTACACCGAGCAGGTGCTCTGTTTCACCAACAACATCCCGCAGCGC  
GACGGCGGCACCCACCTGACCGGCCTGCGCGCCGCGATGACCCGGATCATCAACAAGTAC  
ATCGAAGAAAACGAGCTGGCCAAGAAGGCCAAGGTTCGAGGTAACCGGCGACGACATGCGC

GAAGAAGAGGACATGGCCAAGCGCCGTTTCGCGCCTGAAGGCGTTGATCACGCTCGGCAAG  
ACCCGCGGCTACCTGACGCAGGTCGAGATCTCCGACCACCTGCCCCACAAGCTGGTTCGAC  
GCCGAGACGATGGAAGTCGTGATCGCCATGTTGAACGACATGGGCATCGCGGTCTACGAG  
CAGACGCCCCGACGCCGAGACGCTGTTCCAGAACAACGTCACCCCCACCGCCGCCACTGTC  
GAGGAAGCCGAGGAAGAAGCCGAGGCCGCGCTCTCCACCGTCGACAGCGAATTTCGGCCGC  
ACCACCGACCCGGTCCGCATGTACATGCGCGAAATGGGCACCGTCGAGCTGCTGACCCGC  
GAAGGCGAGATCGAGATCGCCAAGCGCATCGAAGGCGGCCTGCAGGCCATGATGGAGGCG  
ATCAGCGCGTCGCCCCGCCACCATCGCCGCGATCCTGGTGATGGGCGAGGACATCCGCGAA  
GGCAAGGTCGTATCTCGACCATCGTCGACGGCTTCTCCAACCCCAACGAAGCCGACGAC  
TACGTGGCCGAGGAGGACTTCGACGAGTTCGACGAGGAAGACGACGACGACGGAAGGGC  
GGCTCCAAGGCGCTGACCAAGAAGCTGGAAGAATTGAAGCGCGAGGCGCTGTTCGCGCTTC  
GAC

>CFBP2061 *Xylophilus ampelinus*

CACGCCGGCGGCAAGTTCAACCAGAACAGCTACAAGGTCTCGGGCGGCCTGCACGGCGTG  
GGCGTGAGTTGCGTCAACGCGCTCAGCAAGATGCTGCGCCTGACGGTGCGGCGCGACGGC  
AAGGTCCACGTGCTGGAGTTCAGCAAGGGCTTCGTGCAGAACCGCATCGTCGAGCAGGCG  
GGCGGCGTCGAGGTCTCGCCGATGCGCATCATGGGCGACACCGAGAAGCGCGGTACCGAG  
GTGCACTTCTGCCCCGACAACGAGATCTTCAAGGAAAACGCCGATTTCCACTACGAGATC  
CTGGCCAAGCGCCTGCGCGAACTGAGCTTCTTGAACAACGGCGTGCGCATCCGCCTGAAG  
GACGAGCGCAGCGGCAAGGAAGACGATTTCTCCGGCGCCGGCGGCGTGAGGGTTTCGTTC  
GAATTCATCAACAAGGGCAAGACCATCCTGCACCCACGCCCTTCTACGCCGCGGGCGAG  
AAGCCGGCCGAGACGTACGGCGGCATCCCCGGCACGCACATCGGCGTGGAAGTGTCGATG  
CAGTGGAACAGCGGCTACACCGAGCAGGTGCTCTGTTTCACCAACAACATCCCGCAGCGC  
GACGGCGGCACCCACCTGACCGGCCTGCGCGCCGCGATGACCCGGATCATCAACAAGTAC  
ATCGAAGAAAACGAGCTGGCCAAGAAGGCCAAGGTTCGAGGTAACCGGCGACGACATGCGC  
GAAGAAGAGGACATGGCCAAGCGCCGTTTCGCGCCTGAAGGCGTTGATCACGCTCGGCAAG  
ACCCGCGGCTACCTGACGCAGGTCGAGATCTCCGACCACCTGCCCCACAAGCTGGTTCGAC  
GCCGAGACGATGGAAGTCGTGATCGCCATGTTGAACGACATGGGCATCGCGGTCTACGAG  
CAGACGCCCCGACGCCGAGACGCTGTTCCAGAACAACGTCACCCCCACCGCCGCCACTGTC  
GAGGAAGCCGAGGAAGAAGCCGAGGCCGCGCTCTCCACCGTCGACAGCGAATTTCGGCCGC  
ACCACCGACCCGGTCCGCATGTACATGCGCGAAATGGGCACCGTCGAGCTGCTGACCCGC  
GAAGGCGAGATCGAGATCGCCAAGCGCATCGAAGGCGGCCTGCAGGCCATGATGGAGGCG  
ATCAGCGCGTCGCCCCGCCACCATCGCCGCGATCCTGGTGATGGGCGAGGACATCCGCGAA  
GGCAAGGTCGTATCTCGACCATCGTCGACGGCTTCTCCAACCCCAACGAAGCCGACGAC  
TACGTGGCCGAGGAGGACTTCGACGAGTTCGACGAGGAAGACGACGACGACGGAAGGGC  
GGCTCCAAGGCGCTGACCAAGAAGCTGGAAGAATTGAAGCGCGAGGCGCTGTTCGCGCTTC  
GAC

>CFBP2098 *Xylophilus ampelinus*

CACGCCGGCGGCAAGTTCAACCAGAACAGCTACAAGGTCTCGGGCGGCCTGCACGGCGTG  
GGCGTGAGTTGCGTCAACGCGCTCAGCAAGATGCTGCGCCTGACGGTGCGGCGCGACGGC  
AAGGTCCACGTGCTGGAGTTCAGCAAGGGCTTCGTGCAGAACCGCATCGTCGAGCAGGCG  
GGCGGCGTCGAGGTCTCGCCGATGCGCATCATGGGCGACACCGAGAAGCGCGGTACCGAG  
GTGCACTTCTGCCCCGACAACGAGATCTTCAAGGAAAACGCCGATTTCCACTACGAGATC  
CTGGCCAAGCGCCTGCGCGAACTGAGCTTCTTGAACAACGGCGTGCGCATCCGCCTGAAG  
GACGAGCGCAGCGGCAAGGAAGACGATTTCTCCGGCGCCGGCGGCGTGAGGGTTTCGTTC  
GAATTCATCAACAAGGGCAAGACCATCCTGCACCCACGCCCTTCTACGCCGCGGGCGAG  
AAGCCGGCCGAGACGTACGGCGGCATCCCCGGCACGCACATCGGCGTGGAAGTGTCGATG  
CAGTGGAACAGCGGCTACACCGAGCAGGTGCTCTGTTTCACCAACAACATCCCGCAGCGC  
GACGGCGGCACCCACCTGACCGGCCTGCGCGCCGCGATGACCCGGATCATCAACAAGTAC  
ATCGAAGAAAACGAGCTGGCCAAGAAGGCCAAGGTTCGAGGTAACCGGCGACGACATGCGC  
GAAGAAGAGGACATGGCCAAGCGCCGTTTCGCGCCTGAAGGCGTTGATCACGCTCGGCAAG  
ACCCGCGGCTACCTGACGCAGGTCGAGATCTCCGACCACCTGCCCCACAAGCTGGTTCGAC  
GCCGAGACGATGGAAGTCGTGATCGCCATGTTGAACGACATGGGCATCGCGGTCTACGAG  
CAGACGCCCCGACGCCGAGACGCTGTTCCAGAACAACGTCACCCCCACCGCCGCCACTGTC  
GAGGAAGCCGAGGAAGAAGCCGAGGCCGCGCTCTCCACCGTCGACAGCGAATTTCGGCCGC  
ACCACCGACCCGGTCCGCATGTACATGCGCGAAATGGGCACCGTCGAGCTGCTGACCCGC  
GAAGGCGAGATCGAGATCGCCAAGCGCATCGAAGGCGGCCTGCAGGCCATGATGGAGGCG  
ATCAGCGCGTCGCCCCGCCACCATCGCCGCGATCCTGGTGATGGGCGAGGACATCCGCGAA

GGCAAGGTCGTCATCTCGACCATCGTCGACGGCTTCTCCAACCCCAACGAAGCCGACGAC  
TACGTGGCCGAGGAGGACTTCGACGAGTTCGACGAGGAAGACGACGACGACGGCAAGGGC  
GGCTCCAAGGCGCTGACCAAGAAGCTGGAAGAATTGAAGCGCGAGGCGCTGTCGCGCTTC  
GAC

>CFBP2266 *Xylophilus ampelinus*

CACGCCGGCGGCAAGTTCAACCAGAACAGCTACAAGGTCTCGGGCGGCCTGCACGGCGTG  
GGCGTGAGTTGCGTCAACGCGCTCAGCAAGATGCTGCGCCTGACGGTGCGGCGCGACGGC  
AAGGTCCACGTGCTGGAGTTCAGCAAGGGCTTCGTGCAGAACCGCATCGTCGAGCAGGCG  
GGCGGCGTCGAGGTCTCGCCGATGCGCATCATGGGCGACACCGAGAAGCGCGGTACCGAG  
GTGCACTTCCTGCCCCGACAACGAGATCTTCAAGGAAAACGCCGATTTCCACTACGAGATC  
CTGGCCAAGCGCCTGCGCGAACTGAGCTTCCTGAACAACGGCGTGCGCATCCGCCTGAAG  
GACGAGCGCAGCGGCAAGGAAGACGATTTCTCCGGCGCCGGCGGCGTGAGGGTTTTCGTC  
GAATTCATCAACAAGGGCAAGACCATCCTGCACCCACGCCCTTCTACGCCGCGGGCGAG  
AAGCCGGCCGAGACGTACGGCGGCATCCCCGGCACGCACATCGGCGTGGAAGTGTTCGATG  
CAGTGGAACAGCGGCTACACCGAGCAGGTGCTCTGTTTCACCAACAACATCCCGCAGCGC  
GACGGCGGCACCCACCTGACCGGCCTGCGCGCCGCGATGACCCGGATCATCAACAAGTAC  
ATCGAAGAAAACGAGCTGGCCAAGAAGGCCAAGGTGAGGTAACCGGCGACGACATGCGC  
GAAGAAGAGGACATGGCCAAGCGCCGTTTCGCGCCTGAAGGCGTTGATCACGCTCGGCAAG  
ACCCGCGGCTACCTGACGCAGGTTCGAGATCTCCGACCACCTGCCCCGACAAGCTGGTTCGAC  
GCCGAGACGATGGAAGTCGTGATCGCCATGTTGAACGACATGGGCATCGCGGTCTACGAG  
CAGACGCCCCGACGCCGAGACGCTGTTCCAGAACAACGTCACCCCCACCGCCGCCACTGTC  
GAGGAAGCCGAGGAAGAAGCCGAGGCCGCGCTCTCCACCGTCGACAGCGAATTTCGGCCGC  
ACCACCGACCCGGTCCGCATGTACATGCGCGAAATGGGCACCGTCGAGCTGCTGACCCGC  
GAAGGCGAGATCGAGATCGCCAAGCGCATCGAAGGCGGCCTGCAGGCCATGATGGAGGCG  
ATCAGCGCGTCGCCCCGCCACCATCGCCGCGATCCTGGTGATGGGCGAGGACATCCGCGAA  
GGCAAGGTCGTCATCTCGACCATCGTCGACGGCTTCTCCAACCCCAACGAAGCCGACGAC  
TACGTGGCCGAGGAGGACTTCGACGAGTTCGACGAGGAAGACGACGACGACGGCAAGGGC  
GGCTCCAAGGCGCTGACCAAGAAGCTGGAAGAATTGAAGCGCGAGGCGCTGTCGCGCTTC  
GAC

>CFBP2289 *Xylophilus ampelinus*

CACGCCGGCGGCAAGTTCAACCAGAACAGCTACAAGGTCTCGGGCGGCCTGCACGGCGTG  
GGCGTGAGTTGCGTCAACGCGCTCAGCAAGATGCTGCGCCTGACGGTGCGGCGCGACGGC  
AAGGTCCACGTGCTGGAGTTCAGCAAGGGCTTCGTGCAGAACCGCATCGTCGAGCAGGCG  
GGCGGCGTCGAGGTCTCGCCGATGCGCATCATGGGCGACACCGAGAAGCGCGGTACCGAG  
GTGCACTTCCTGCCCCGACAACGAGATCTTCAAGGAAAACGCCGATTTCCACTACGAGATC  
CTGGCCAAGCGCCTGCGCGAACTGAGCTTCCTGAACAACGGCGTGCGCATCCGCCTGAAG  
GACGAGCGCAGCGGCAAGGAAGACGATTTCTCCGGCGCCGGCGGCGTGAGGGTTTTCGTC  
GAATTCATCAACAAGGGCAAGACCATCCTGCACCCACGCCCTTCTACGCCGCGGGCGAG  
AAGCCGGCCGAGACGTACGGCGGCATCCCCGGCACGCACATCGGCGTGGAAGTGTTCGATG  
CAGTGGAACAGCGGCTACACCGAGCAGGTGCTCTGTTTCACCAACAACATCCCGCAGCGC  
GACGGCGGCACCCACCTGACCGGCCTGCGCGCCGCGATGACCCGGATCATCAACAAGTAC  
ATCGAAGAAAACGAGCTGGCCAAGAAGGCCAAGGTGAGGTAACCGGCGACGACATGCGC  
GAAGAAGAGGACATGGCCAAGCGCCGTTTCGCGCCTGAAGGCGTTGATCACGCTCGGCAAG  
ACCCGCGGCTACCTGACGCAGGTTCGAGATCTCCGACCACCTGCCCCGACAAGCTGGTTCGAC  
GCCGAGACGATGGAAGTCGTGATCGCCATGTTGAACGACATGGGCATCGCGGTCTACGAG  
CAGACGCCCCGACGCCGAGACGCTGTTCCAGAACAACGTCACCCCCACCGCCGCCACTGTC  
GAGGAAGCCGAGGAAGAAGCCGAGGCCGCGCTCTCCACCGTCGACAGCGAATTTCGGCCGC  
ACCACCGACCCGGTCCGCATGTACATGCGCGAAATGGGCACCGTCGAGCTGCTGACCCGC  
GAAGGCGAGATCGAGATCGCCAAGCGCATCGAAGGCGGCCTGCAGGCCATGATGGAGGCG  
ATCAGCGCGTCGCCCCGCCACCATCGCCGCGATCCTGGTGATGGGCGAGGACATCCGCGAA  
GGCAAGGTCGTCATCTCGACCATCGTCGACGGCTTCTCCAACCCCAACGAAGCCGACGAC  
TACGTGGCCGAGGAGGACTTCGACGAGTTCGACGAGGAAGACGACGACGACGGCAAGGGC  
GGCTCCAAGGCGCTGACCAAGAAGCTGGAAGAATTGAAGCGCGAGGCGCTGTCGCGCTTC  
GAC

>CFBP2291 *Xylophilus ampelinus*

CACGCCGGCGGCAAGTTCAACCAGAACAGCTACAAGGTCTCGGGCGGCCTGCACGGCGTG  
GGCGTGAGTTGCGTCAACGCGCTCAGCAAGATGCTGCGCCTGACGGTGCGGCGCGACGGC  
AAGGTCCACGTGCTGGAGTTCAGCAAGGGCTTCGTGCAGAACCGCATCGTCGAGCAGGCG

GGCGGCGTCGAGGTCTCGCCGATGCGCATCATGGGCGACACCGAGAAGCGCGGTACCGAG  
GTGCACTTCCTGCCCCGACAACGAGATCTTCAAGGAAAACGCCGATTTCCACTACGAGATC  
CTGGCCAAGCGCCTGCGCGAACTGAGCTTCTGAACAACGGCGTGCGCATCCGCCTGAAG  
GACGAGCGCAGCGGCAAGGAAGACGATTTCTCCGGCGCCGGCGGCGTGCGAGGGTTTCGTC  
GAATTCATCAACAAGGGCAAGACCATCCTGCACCCACGCCCTTCTACGCCGCGGGCGAG  
AAGCCGGCCGAGACGTACGGCGGCATCCCCGGCAGCACATCGGCGTGGAAGTGTTCGATG  
CAGTGGAACAGCGGCTACACCGAGCAGGTGCTCTGTTTCACCAACAACATCCCGCAGCGC  
GACGGCGGCACCCACCTGACCGGCCTGCGCGCCGCGATGACCCGGATCATCAACAAGTAC  
ATCGAAGAAAACGAGCTGGCCAAGAAGGCCAAGGTGAGGTAACCGGCGACGACATGCGC  
GAAGAAGAGGACATGGCCAAGCGCCGTTTCGCGCCTGAAGGCGTTGATCACGCTCGGCAAG  
ACCCGCGGCTACCTGACGCAGGTTCGAGATCTCCGACCACCTGCCCCGACAAGCTGGTTCGAC  
GCCGAGACGATGGAAGTCGTGATCGCCATGTTGAACGACATGGGCATCGCGGTCTACGAG  
CAGACGCCCCGACGCCGAGACGCTGTTCCAGAACAACGTCAACCCACCGCCGCCACTGTC  
GAGGAAGCCGAGGAAGAAGCCGAGGCCGCGCTCTCCACCGTCGACAGCGAATTTCGGCCGC  
ACCACCGACCCGGTCCGCATGTACATGCGCGAAATGGGCACCGTCGAGCTGCTGACCCGC  
GAAGGCGAGATCGAGATCGCCAAGCGCATCGAAGGCGGCCTGCAGGCCATGATGGAGGCG  
ATCAGCGCGTCGCCCCGCCACCATCGCCGCGATCCTGGTGATGGGCGAGGACATCCGCGAA  
GGCAAGGTCGTATCTCGACCATCGTCGACGGCTTCTCCAACCCCAACGAAGCCGACGAC  
TACGTGGCCGAGGAGGACTTCGACGAGTTCGACGAGGAAGACGACGACGACGGCAAGGGC  
GGCTCCAAGGCGCTGACCAAGAAGCTGGAAGAATTGAAGCGCGAGGCGCTGTTCGCGCTTC  
GAC

>CFBP2292 *Xylophilus ampelinus*

CACGCCGGCGGCAAGTTCAACCAGAACAGCTACAAGGTCTCGGGCGGCCTGCACGGCGTG  
GGCGTGAGTTGCGTCAACGCGCTCAGCAAGATGCTGCGCCTGACGGTGCGGCGCGACGGC  
AAGGTCCACGTGCTGGAGTTCAGCAAGGGCTTCGTGCAGAACCGCATCGTCGAGCAGGCG  
GGCGGCGTCGAGGTCTCGCCGATGCGCATCATGGGCGACACCGAGAAGCGCGGTACCGAG  
GTGCACTTCCTGCCCCGACAACGAGATCTTCAAGGAAAACGCCGATTTCCACTACGAGATC  
CTGGCCAAGCGCCTGCGCGAACTGAGCTTCTGAACAACGGCGTGCGCATCCGCCTGAAG  
GACGAGCGCAGCGGCAAGGAAGACGATTTCTCCGGCGCCGGCGGCGTGCGAGGGTTTCGTC  
GAATTCATCAACAAGGGCAAGACCATCCTGCACCCACGCCCTTCTACGCCGCGGGCGAG  
AAGCCGGCCGAGACGTACGGCGGCATCCCCGGCAGCACATCGGCGTGGAAGTGTTCGATG  
CAGTGGAACAGCGGCTACACCGAGCAGGTGCTCTGTTTCACCAACAACATCCCGCAGCGC  
GACGGCGGCACCCACCTGACCGGCCTGCGCGCCGCGATGACCCGGATCATCAACAAGTAC  
ATCGAAGAAAACGAGCTGGCCAAGAAGGCCAAGGTGAGGTAACCGGCGACGACATGCGC  
GAAGAAGAGGACATGGCCAAGCGCCGTTTCGCGCCTGAAGGCGTTGATCACGCTCGGCAAG  
ACCCGCGGCTACCTGACGCAGGTTCGAGATCTCCGACCACCTGCCCCGACAAGCTGGTTCGAC  
GCCGAGACGATGGAAGTCGTGATCGCCATGTTGAACGACATGGGCATCGCGGTCTACGAG  
CAGACGCCCCGACGCCGAGACGCTGTTCCAGAACAACGTCAACCCACCGCCGCCACTGTC  
GAGGAAGCCGAGGAAGAAGCCGAGGCCGCGCTCTCCACCGTCGACAGCGAATTTCGGCCGC  
ACCACCGACCCGGTCCGCATGTACATGCGCGAAATGGGCACCGTCGAGCTGCTGACCCGC  
GAAGGCGAGATCGAGATCGCCAAGCGCATCGAAGGCGGCCTGCAGGCCATGATGGAGGCG  
ATCAGCGCGTCGCCCCGCCACCATCGCCGCGATCCTGGTGATGGGCGAGGACATCCGCGAA  
GGCAAGGTCGTATCTCGACCATCGTCGACGGCTTCTCCAACCCCAACGAAGCCGACGAC  
TACGTGGCCGAGGAGGACTTCGACGAGTTCGACGAGGAAGACGACGACGACGGCAAGGGC  
GGCTCCAAGGCGCTGACCAAGAAGCTGGAAGAATTGAAGCGCGAGGCGCTGTTCGCGCTTC  
GAC

>CFBP2293 *Xylophilus ampelinus*

CACGCCGGCGGCAAGTTCAACCAGAACAGCTACAAGGTCTCGGGCGGCCTGCACGGCGTG  
GGCGTGAGTTGCGTCAACGCGCTCAGCAAGATGCTGCGCCTGACGGTGCGGCGCGACGGC  
AAGGTCCACGTGCTGGAGTTCAGCAAGGGCTTCGTGCAGAACCGCATCGTCGAGCAGGCG  
GGCGGCGTCGAGGTCTCGCCGATGCGCATCATGGGCGACACCGAGAAGCGCGGTACCGAG  
GTGCACTTCCTGCCCCGACAACGAGATCTTCAAGGAAAACGCCGATTTCCACTACGAGATC  
CTGGCCAAGCGCCTGCGCGAACTGAGCTTCTGAACAACGGCGTGCGCATCCGCCTGAAG  
GACGAGCGCAGCGGCAAGGAAGACGATTTCTCCGGCGCCGGCGGCGTGCGAGGGTTTCGTC  
GAATTCATCAACAAGGGCAAGACCATCCTGCACCCACGCCCTTCTACGCCGCGGGCGAG  
AAGCCGGCCGAGACGTACGGCGGCATCCCCGGCAGCACATCGGCGTGGAAGTGTTCGATG  
CAGTGGAACAGCGGCTACACCGAGCAGGTGCTCTGTTTCACCAACAACATCCCGCAGCGC  
GACGGCGGCACCCACCTGACCGGCCTGCGCGCCGCGATGACCCGGATCATCAACAAGTAC

ATCGAAGAAAACGAGCTGGCCAAGAAGGCCAAGGTTCGAGGTAACCGGCGACGACATGCGC  
GAAGAAGAGGACATGGCCAAGCGCCGTTTCGCGCCTGAAGGCGTTGATCACGCTCGGCAAG  
ACCCGCGGCTACCTGACGCAGGTTCGAGATCTCCGACCACCTGCCCCACAAGCTGGTTCGAC  
GCCGAGACGATGGAAGTCGTGATCGCCATGTTGAACGACATGGGCATCGCGGTCTACGAG  
CAGACGCCCCGACGCCGAGACGCTGTTCCAGAACAACGTCACCCCCACCGCCGCCACTGTC  
GAGGAAGCCGAGGAAGAAGCCGAGGCCGCGCTCTCCACCGTCGACAGCGAATTTCGGCCGC  
ACCACCGACCCGGTCCGCATGTACATGCGCGAAATGGGCACCGTCGAGCTGCTGACCCGC  
GAAGGCGAGATCGAGATCGCCAAGCGCATCGAAGGCGGCCTGCAGGCCATGATGGAGGCG  
ATCAGCGCGTCGCCCCGCCACCATCGCCGCGATCCTGGTGATGGGCGAGGACATCCGCGAA  
GGCAAGGTCGTATCTCGACCATCGTCGACGGCTTCTCCAACCCCAACGAAGCCGACGAC  
TACGTGGCCGAGGAGGACTTCGACGAGTTCGACGAGGAAGACGACGACGACGGAAGGGC  
GGCTCCAAGGCGCTGACCAAGAAGCTGGAAGAATTGAAGCGCGAGGCGCTGTTCGCGCTTC  
GAC

>CFBP2294 *Xylophilus ampelinus*

CACGCCGGCGGCAAGTTCAACCAGAACAGCTACAAGGTCTCGGGCGGCCTGCACGGCGTG  
GGCGTGAGTTGCGTCAACGCGCTCAGCAAGATGCTGCGCCTGACGGTGCGGCGCGACGGC  
AAGGTCCACGTGCTGGAGTTCAGCAAGGGCTTCGTGCAGAACCGCATCGTCGAGCAGGCG  
GGCGGCGTCGAGGTCTCGCCGATGCGCATCATGGGCGACACCGAGAAGCGCGGTACCGAG  
GTGCACTTCCTGCCCCGACAACGAGATCTTCAAGGAAAACGCCGATTTCCACTACGAGATC  
CTGGCCAAGCGCCTGCGCGAACTGAGCTTCTGAACAACGGCGTGCGCATCCGCCTGAAG  
GACGAGCGCAGCGGCAAGGAAGACGATTTCTCCGGCGCCGGCGGCGTGAGGGTTTCGTTC  
GAATTCATCAACAAGGGCAAGACCATCCTGCACCCACGCCCTTCTACGCCGCGGGCGAG  
AAGCCGGCCGAGACGTACGGCGGCATCCCCGGCACGCACATCGGCGTGGAAGTGTTCGATG  
CAGTGGAACAGCGGCTACACCGAGCAGGTGCTCTGTTTCACCAACAACATCCCGCAGCGC  
GACGGCGGCACCCACCTGACCGGCCTGCGCGCCGCGATGACCCGGATCATCAACAAGTAC  
ATCGAAGAAAACGAGCTGGCCAAGAAGGCCAAGGTTCGAGGTAACCGGCGACGACATGCGC  
GAAGAAGAGGACATGGCCAAGCGCCGTTTCGCGCCTGAAGGCGTTGATCACGCTCGGCAAG  
ACCCGCGGCTACCTGACGCAGGTTCGAGATCTCCGACCACCTGCCCCACAAGCTGGTTCGAC  
GCCGAGACGATGGAAGTCGTGATCGCCATGTTGAACGACATGGGCATCGCGGTCTACGAG  
CAGACGCCCCGACGCCGAGACGCTGTTCCAGAACAACGTCACCCCCACCGCCGCCACTGTC  
GAGGAAGCCGAGGAAGAAGCCGAGGCCGCGCTCTCCACCGTCGACAGCGAATTTCGGCCGC  
ACCACCGACCCGGTCCGCATGTACATGCGCGAAATGGGCACCGTCGAGCTGCTGACCCGC  
GAAGGCGAGATCGAGATCGCCAAGCGCATCGAAGGCGGCCTGCAGGCCATGATGGAGGCG  
ATCAGCGCGTCGCCCCGCCACCATCGCCGCGATCCTGGTGATGGGCGAGGACATCCGCGAA  
GGCAAGGTCGTATCTCGACCATCGTCGACGGCTTCTCCAACCCCAACGAAGCCGACGAC  
TACGTGGCCGAGGAGGACTTCGACGAGTTCGACGAGGAAGACGACGACGACGGAAGGGC  
GGCTCCAAGGCGCTGACCAAGAAGCTGGAAGAATTGAAGCGCGAGGCGCTGTTCGCGCTTC  
GAC

>CFBP2295 *Xylophilus ampelinus*

CACGCCGGCGGCAAGTTCAACCAGAACAGCTACAAGGTCTCGGGCGGCCTGCACGGCGTG  
GGCGTGAGTTGCGTCAACGCGCTCAGCAAGATGCTGCGCCTGACGGTGCGGCGCGACGGC  
AAGGTCCACGTGCTGGAGTTCAGCAAGGGCTTCGTGCAGAACCGCATCGTCGAGCAGGCG  
GGCGGCGTCGAGGTCTCGCCGATGCGCATCATGGGCGACACCGAGAAGCGCGGTACCGAG  
GTGCACTTCCTGCCCCGACAACGAGATCTTCAAGGAAAACGCCGATTTCCACTACGAGATC  
CTGGCCAAGCGCCTGCGCGAACTGAGCTTCTGAACAACGGCGTGCGCATCCGCCTGAAG  
GACGAGCGCAGCGGCAAGGAAGACGATTTCTCCGGCGCCGGCGGCGTGAGGGTTTCGTTC  
GAATTCATCAACAAGGGCAAGACCATCCTGCACCCACGCCCTTCTACGCCGCGGGCGAG  
AAGCCGGCCGAGACGTACGGCGGCATCCCCGGCACGCACATCGGCGTGGAAGTGTTCGATG  
CAGTGGAACAGCGGCTACACCGAGCAGGTGCTCTGTTTCACCAACAACATCCCGCAGCGC  
GACGGCGGCACCCACCTGACCGGCCTGCGCGCCGCGATGACCCGGATCATCAACAAGTAC  
ATCGAAGAAAACGAGCTGGCCAAGAAGGCCAAGGTTCGAGGTAACCGGCGACGACATGCGC  
GAAGAAGAGGACATGGCCAAGCGCCGTTTCGCGCCTGAAGGCGTTGATCACGCTCGGCAAG  
ACCCGCGGCTACCTGACGCAGGTTCGAGATCTCCGACCACCTGCCCCACAAGCTGGTTCGAC  
GCCGAGACGATGGAAGTCGTGATCGCCATGTTGAACGACATGGGCATCGCGGTCTACGAG  
CAGACGCCCCGACGCCGAGACGCTGTTCCAGAACAACGTCACCCCCACCGCCGCCACTGTC  
GAGGAAGCCGAGGAAGAAGCCGAGGCCGCGCTCTCCACCGTCGACAGCGAATTTCGGCCGC  
ACCACCGACCCGGTCCGCATGTACATGCGCGAAATGGGCACCGTCGAGCTGCTGACCCGC  
GAAGGCGAGATCGAGATCGCCAAGCGCATCGAAGGCGGCCTGCAGGCCATGATGGAGGCG



ATCAGCGCGTCGCCCCGCCACCATCGCCGCGATCCTGGTGATGGGCGAGGACATCCGCGAA  
GGCAAGGTCGTCATCTCGACCATCGTCGACGGCTTCTCCAACCCCAACGAAGCCGACGAC  
TACGTGGCCGAGGAGGACTTCGACGAGTTCGACGAGGAAGACGACGACGACGGCAAGGGC  
GGCTCCAAGGCGCTGACCAAGAAGCTGGAAGAATTGAAGCGCGAGGCGCTGTTCGCGCTTC  
GAC

>CFBP2358 *Xylophilus ampelinus*

CACGCCGGCGGCAAGTTCAACCAGAACAGCTACAAGGTCTCGGGCGGCCTGCACGGCGTG  
GGCGTGAGTTGCGTCAACGCGCTCAGCAAGATGCTGCGCCTGACGGTGCGGCGCGACGGC  
AAGGTCCACGTGCTGGAGTTCAGCAAGGGCTTCGTGCAGAACCGCATCGTCGAGCAGGCG  
GGCGGCGTCGAGGTCTCGCCGATGCGCATCATGGGCGACACCGAGAAGCGCGGTACCGAG  
GTGCACTTCTGCCCCGACAACGAGATCTTCAAGGAAAACGCCGATTTCCACTACGAGATC  
CTGGCCAAGCGCCTGCGCGAACTGAGCTTCTGAACAACGGCGTGCGCATCCGCCTGAAG  
GACGAGCGCAGCGGCAAGGAAGACGATTTCTCCGGCGCCGGCGGCGTGAGGGTTTTCGTC  
GAATTCATCAACAAGGGCAAGACCATCCTGCACCCACGCCCTTCTACGCCGCGGGCGAG  
AAGCCGGCCGAGACGTACGGCGGCATCCCCGGCACGCACATCGGCGTGGAAGTGTTCGATG  
CAGTGGAACAGCGGCTACACCGAGCAGGTGCTCTGTTTCACCAACAACATCCCGCAGCGC  
GACGGCGGCACCCACCTGACCGGCCTGCGCGCCGCGATGACCCGGATCATCAACAAGTAC  
ATCGAAGAAAACGAGCTGGCCAAGAAGGCCAAGGTTCGAGGTAACCGGCGACGACATGCGC  
GAAGAAGAGGACATGGCCAAGCGCCGTTTCGCGCCTGAAGGCGTTGATCACGCTCGGCAAG  
ACCCGCGGCTACCTGACGCGAGTTCGAGATCTCCGACCACCTGCCCCGACAAGCTGGTTCGAC  
GCCGAGACGATGGAAGTCGTGATCGCCATGTTGAACGACATGGGCATCGCGGTCTACGAG  
CAGACGCCCCGACGCCGAGACGCTGTTCCAGAACAACGTCACCCCCACCGCCGCCACTGTC  
GAGGAAGCCGAGGAAGAAGCCGAGGCCGCGCTCTCCACCGTCGACAGCGAATTTCGGCCGC  
ACCACCGACCCGGTCCGCATGTACATGCGCGAAATGGGCACCGTCGAGCTGCTGACCCGC  
GAAGGCGAGATCGAGATCGCCAAGCGCATCGAAGGCGGCCTGCAGGCCATGATGGAGGCG  
ATCAGCGCGTCGCCCCGCCACCATCGCCGCGATCCTGGTGATGGGCGAGGACATCCGCGAA  
GGCAAGGTCGTCATCTCGACCATCGTCGACGGCTTCTCCAACCCCAACGAAGCCGACGAC  
TACGTGGCCGAGGAGGACTTCGACGAGTTCGACGAGGAAGACGACGACGACGGCAAGGGC  
GGCTCCAAGGCGCTGACCAAGAAGCTGGAAGAATTGAAGCGCGAGGCGCTGTTCGCGCTTC  
GAC

>CFBP2393 *Xylophilus ampelinus*

CACGCCGGCGGCAAGTTCAACCAGAACAGCTACAAGGTCTCGGGCGGCCTGCACGGCGTG  
GGCGTGAGTTGCGTCAACGCGCTCAGCAAGATGCTGCGCCTGACGGTGCGGCGCGACGGC  
AAGGTCCACGTGCTGGAGTTCAGCAAGGGCTTCGTGCAGAACCGCATCGTCGAGCAGGCG  
GGCGGCGTCGAGGTCTCGCCGATGCGCATCATGGGCGACACCGAGAAGCGCGGTACCGAG  
GTGCACTTCTGCCCCGACAACGAGATCTTCAAGGAAAACGCCGATTTCCACTACGAGATC  
CTGGCCAAGCGCCTGCGCGAACTGAGCTTCTGAACAACGGCGTGCGCATCCGCCTGAAG  
GACGAGCGCAGCGGCAAGGAAGACGATTTCTCCGGCGCCGGCGGCGTGAGGGTTTTCGTC  
GAATTCATCAACAAGGGCAAGACCATCCTGCACCCACGCCCTTCTACGCCGCGGGCGAG  
AAGCCGGCCGAGACGTACGGCGGCATCCCCGGCACGCACATCGGCGTGGAAGTGTTCGATG  
CAGTGGAACAGCGGCTACACCGAGCAGGTGCTCTGTTTCACCAACAACATCCCGCAGCGC  
GACGGCGGCACCCACCTGACCGGCCTGCGCGCCGCGATGACCCGGATCATCAACAAGTAC  
ATCGAAGAAAACGAGCTGGCCAAGAAGGCCAAGGTTCGAGGTAACCGGCGACGACATGCGC  
GAAGAAGAGGACATGGCCAAGCGCCGTTTCGCGCCTGAAGGCGTTGATCACGCTCGGCAAG  
ACCCGCGGCTACCTGACGCGAGTTCGAGATCTCCGACCACCTGCCCGACAAGCTGGTTCGAC  
GCCGAGACGATGGAAGTCGTGATCGCCATGTTGAACGACATGGGCATCGCGGTCTACGAG  
CAGACGCCCCGAGCCGAGACGCTGTTCCAGAACAACGTCACCCCCACCGCCGCCACTGTC  
GAGGAAGCCGAGGAAGAAGCCGAGGCCGCGCTCTCCACCGTCGACAGCGAATTTCGGCCGC  
ACCACCGACCCGGTCCGCATGTACATGCGCGAAATGGGCACCGTCGAGCTGCTGACCCGC  
GAAGGCGAGATCGAGATCGCCAAGCGCATCGAAGGCGGCCTGCAGGCCATGATGGAGGCG  
ATCAGCGCGTCGCCCCGCCACCATCGCCGCGATCCTGGTGATGGGCGAGGACATCCGCGAA  
GGCAAGGTCGTCATCTCGACCATCGTCGACGGCTTCTCCAACCCCAACGAAGCCGACGAC  
TACGTGGCCGAGGAGGACTTCGACGAGTTCGACGAGGAAGACGACGACGACGGCAAGGGC  
GGCTCCAAGGCGCTGACCAAGAAGCTGGAAGAATTGAAGCGCGAGGCGCTGTTCGCGCTTC  
GAC

>CFBP2394 *Xylophilus ampelinus*

CACGCCGGCGGCAAGTTCAACCAGAACAGCTACAAGGTCTCGGGCGGCCTGCACGGCGTG  
GGCGTGAGTTGCGTCAACGCGCTCAGCAAGATGCTGCGCCTGACGGTGCGGCGCGACGGC

AAGGTCCACGTGCTGGAGTTCAGCAAGGGCTTCGTGCAGAACCGCATCGTCGAGCAGGCG  
GGCGGCGTCGAGGTCTCGCCGATGCGCATCATGGGCGACACCGAGAAGCGCGGTACCGAG  
GTGCACTTCCTGCCCAGACAACGAGATCTTCAAGGAAAACGCCGATTTCCACTACGAGATC  
CTGGCCAAGCGCCTGCGCGAACTGAGCTTCTGAACAACGGCGTGCGCATCCGCCTGAAG  
GACGAGCGCAGCGGCAAGGAAGACGATTTCTCCGGCGCCGGCGGCGTGAGGGTTTCGT  
GAATTCATCAACAAGGGCAAGACCATCCTGCACCCACGCCCTTCTACGCCGCGGGCGAG  
AAGCCGGCCGAGACGTACGGCGGCATCCCCGGCACGCACATCGGCGTGGAAGTGTTCGATG  
CAGTGGAACAGCGGCTACACCGAGCAGGTGCTCTGTTTCACCAACAACATCCCGCAGCGC  
GACGGCGGCACCCACCTGACCGGCCTGCGCGCCGCGATGACCCGGATCATCAACAAGTAC  
ATCGAAGAAAACGAGCTGGCCAAGAAGGCCAAGGTTCGAGGTAACCGGCGACGACATGCGC  
GAAGAAGAGGACATGGCCAAGCGCCGTTTCGCGCCTGAAGGCGTTGATCACGCTCGGCAAG  
ACCCGCGGCTACCTGACGCAGGTTCGAGATCTCCGACCACCTGCCCAGACAAGCTGGTTCGAC  
GCCGAGACGATGGAAGTTCGTGATCGCCATGTTGAACGACATGGGCATCGCGGTCTACGAG  
CAGACGCCCCGACGCCGAGACGCTGTTCCAGAACAACGTACCCCCACCGCCGCCACTGTC  
GAGGAAGCCGAGGAAGAAGCCGAGGCCGCGCTCTCCACCGTCGACAGCGAATTTCGGCCGC  
ACCACCGACCCGGTCCGCATGTACATGCGCGAAATGGGCACCGTCGAGCTGCTGACCCGC  
GAAGGCGAGATCGAGATCGCCAAGCGCATCGAAGGCGGCCTGCAGGCCATGATGGAGGCG  
ATCAGCGCGTCGCCCCGCCACCATCGCCGCGATCCTGGTGATGGGCGAGGACATCCGCGAA  
GGCAAGGTCGTATCTCGACCATCGTCGACGGCTTCTCCAACCCCAACGAAGCCGACGAC  
TACGTGGCCGAGGAGGACTTCGACGAGTTCGACGAGGAAGACGACGACGACGGCAAGGGC  
GGCTCCAAGGCGCTGACCAAGAAGCTGGAAGAATTGAAGCGCGAGGCGCTGTTCGCGCTTC  
GAC

>CFBP2399 *Xylophilus ampelinus*

CACGCCGGCGGCAAGTTCAACCAGAACAGCTACAAGGTCTCGGGCGGCCTGCACGGCGTG  
GGCGTGAGTTGCGTCAACGCGCTCAGCAAGATGCTGCGCCTGACGGTGCGGCGCGACGGC  
AAGGTCCACGTGCTGGAGTTCAGCAAGGGCTTCGTGCAGAACCGCATCGTCGAGCAGGCG  
GGCGGCGTCGAGGTCTCGCCGATGCGCATCATGGGCGACACCGAGAAGCGCGGTACCGAG  
GTGCACTTCCTGCCCAGACAACGAGATCTTCAAGGAAAACGCCGATTTCCACTACGAGATC  
CTGGCCAAGCGCCTGCGCGAACTGAGCTTCTGAACAACGGCGTGCGCATCCGCCTGAAG  
GACGAGCGCAGCGGCAAGGAAGACGATTTCTCCGGCGCCGGCGGCGTGAGGGTTTCGT  
GAATTCATCAACAAGGGCAAGACCATCCTGCACCCACGCCCTTCTACGCCGCGGGCGAG  
AAGCCGGCCGAGACGTACGGCGGCATCCCCGGCACGCACATCGGCGTGGAAGTGTTCGATG  
CAGTGGAACAGCGGCTACACCGAGCAGGTGCTCTGTTTCACCAACAACATCCCGCAGCGC  
GACGGCGGCACCCACCTGACCGGCCTGCGCGCCGCGATGACCCGGATCATCAACAAGTAC  
ATCGAAGAAAACGAGCTGGCCAAGAAGGCCAAGGTTCGAGGTAACCGGCGACGACATGCGC  
GAAGAAGAGGACATGGCCAAGCGCCGTTTCGCGCCTGAAGGCGTTGATCACGCTCGGCAAG  
ACCCGCGGCTACCTGACGCAGGTTCGAGATCTCCGACCACCTGCCCAGACAAGCTGGTTCGAC  
GCCGAGACGATGGAAGTTCGTGATCGCCATGTTGAACGACATGGGCATCGCGGTCTACGAG  
CAGACGCCCCGACGCCGAGACGCTGTTCCAGAACAACGTACCCCCACCGCCGCCACTGTC  
GAGGAAGCCGAGGAAGAAGCCGAGGCCGCGCTCTCCACCGTCGACAGCGAATTTCGGCCGC  
ACCACCGACCCGGTCCGCATGTACATGCGCGAAATGGGCACCGTCGAGCTGCTGACCCGC  
GAAGGCGAGATCGAGATCGCCAAGCGCATCGAAGGCGGCCTGCAGGCCATGATGGAGGCG  
ATCAGCGCGTCGCCCCGCCACCATCGCCGCGATCCTGGTGATGGGCGAGGACATCCGCGAA  
GGCAAGGTCGTATCTCGACCATCGTCGACGGCTTCTCCAACCCCAACGAAGCCGACGAC  
TACGTGGCCGAGGAGGACTTCGACGAGTTCGACGAGGAAGACGACGACGACGGCAAGGGC  
GGCTCCAAGGCGCTGACCAAGAAGCTGGAAGAATTGAAGCGCGAGGCGCTGTTCGCGCTTC  
GAC

>CFBP2400 *Xylophilus ampelinus*

CACGCCGGCGGCAAGTTCAACCAGAACAGCTACAAGGTCTCGGGCGGCCTGCACGGCGTG  
GGCGTGAGTTGCGTCAACGCGCTCAGCAAGATGCTGCGCCTGACGGTGCGGCGCGACGGC  
AAGGTCCACGTGCTGGAGTTCAGCAAGGGCTTCGTGCAGAACCGCATCGTCGAGCAGGCG  
GGCGGCGTCGAGGTCTCGCCGATGCGCATCATGGGCGACACCGAGAAGCGCGGTACCGAG  
GTGCACTTCCTGCCCAGACAACGAGATCTTCAAGGAAAACGCCGATTTCCACTACGAGATC  
CTGGCCAAGCGCCTGCGCGAACTGAGCTTCTGAACAACGGCGTGCGCATCCGCCTGAAG  
GACGAGCGCAGCGGCAAGGAAGACGATTTCTCCGGCGCCGGCGGCGTGAGGGTTTCGT  
GAATTCATCAACAAGGGCAAGACCATCCTGCACCCACGCCCTTCTACGCCGCGGGCGAG  
AAGCCGGCCGAGACGTACGGCGGCATCCCCGGCACGCACATCGGCGTGGAAGTGTTCGATG  
CAGTGGAACAGCGGCTACACCGAGCAGGTGCTCTGTTTCACCAACAACATCCCGCAGCGC

GACGGCGGCACCCACCTGACCGGCCTGCGCGCCGCGATGACCCGGATCATCAACAAGTAC  
ATCGAAGAAAACGAGCTGGCCAAGAAGGCCAAGGTCGAGGTAACCGGCGACGACATGCGC  
GAAGAAGAGGACATGGCCAAGCGCCGTTTCGCGCCTGAAGGCGTTGATCACGCTCGGCAAG  
ACCCGCGGCTACCTGACGCAGGTCGAGATCTCCGACCACCTGCCCCACAAGCTGGTTCGAC  
GCCGAGACGATGGAAGTCGTGATCGCCATGTTGAACGACATGGGCATCGCGGTCTACGAG  
CAGACGCCCCGACGCCGAGACGCTGTTCCAGAACAACGTCACCCCCACCGCCGCCACTGTC  
GAGGAAGCCGAGGAAGAAGCCGAGGCCGCGCTCTCCACCGTCGACAGCGAATTTCGGCCGC  
ACCACCGACCCGGTCCGCATGTACATGCGCGAAATGGGCACCGTCGAGCTGCTGACCCGC  
GAAGGCGAGATCGAGATCGCCAAGCGCATCGAAGGCGGCCTGCAGGCCATGATGGAGGCG  
ATCAGCGCGTCGCCCCGCCACCATCGCCGCGATCCTGGTGATGGGCGAGGACATCCGCGAA  
GGCAAGGTCGTATCTCGACCATCGTCGACGGCTTCTCCAACCCCAACGAAGCCGACGAC  
TACGTGGCCGAGGAGGACTTCGACGAGTTCGACGAGGAAGACGACGACGACGGAAGGGC  
GGCTCCAAGGCGCTGACCAAGAAGCTGGAAGAATTGAAGCGCGAGGCGCTGTTCGCGCTTC  
GAC

>CFBP2730 *Xylophilus ampelinus*

CACGCCGGCGGCAAGTTCAACCAGAACAGCTACAAGGTCTCGGGCGGCCTGCACGGCGTG  
GGCGTGAGTTGCGTCAACGCGCTCAGCAAGATGCTGCGCCTGACGGTGCGGCGCGACGGC  
AAGGTCCACGTGCTGGAGTTCAGCAAGGGCTTCGTGCAGAACCGCATCGTCGAGCAGGCG  
GGCGGCGTCGAGGTCTCGCCGATGCGCATCATGGGCGACACCGAGAAGCGCGGTACCGAG  
GTGCACTTCCTGCCCCACAACGAGATCTTCAAGGAAAACGCCGATTTCCACTACGAGATC  
CTGGCCAAGCGCCTGCGCGAACTGAGCTTCCTGAACAACGGCGTGCGCATCCGCCTGAAG  
GACGAGCGCAGCGGCAAGGAAGACGATTTCTCCGGCGCCGGCGGCGTGACAGGGTTTCGT  
GAATTCATCAACAAGGGCAAGACCATCCTGCACCCACGCCCTTCTACGCCGCGGGCGAG  
AAGCCGGCCGAGACGTACGGCGGCATCCCCGGCACGCACATCGGCGTGGAAGTGTTCGATG  
CAGTGGAACAGCGGCTACACCGAGCAGGTGCTCTGTTTCACCAACAACATCCCGCAGCGC  
GACGGCGGCACCCACCTGACCGGCCTGCGCGCCGCGATGACCCGGATCATCAACAAGTAC  
ATCGAAGAAAACGAGCTGGCCAAGAAGGCCAAGGTCGAGGTAACCGGCGACGACATGCGC  
GAAGAAGAGGACATGGCCAAGCGCCGTTTCGCGCCTGAAGGCGTTGATCACGCTCGGCAAG  
ACCCGCGGCTACCTGACGCAGGTCGAGATCTCCGACCACCTGCCCCACAAGCTGGTTCGAC  
GCCGAGACGATGGAAGTCGTGATCGCCATGTTGAACGACATGGGCATCGCGGTCTACGAG  
CAGACGCCCCGACGCCGAGACGCTGTTCCAGAACAACGTCACCCCCACCGCCGCCACTGTC  
GAGGAAGCCGAGGAAGAAGCCGAGGCCGCGCTCTCCACCGTCGACAGCGAATTTCGGCCGC  
ACCACCGACCCGGTCCGCATGTACATGCGCGAAATGGGCACCGTCGAGCTGCTGACCCGC  
GAAGGCGAGATCGAGATCGCCAAGCGCATCGAAGGCGGCCTGCAGGCCATGATGGAGGCG  
ATCAGCGCGTCGCCCCGCCACCATCGCCGCGATCCTGGTGATGGGCGAGGACATCCGCGAA  
GGCAAGGTCGTATCTCGACCATCGTCGACGGCTTCTCCAACCCCAACGAAGCCGACGAC  
TACGTGGCCGAGGAGGACTTCGACGAGTTCGACGAGGAAGACGACGACGACGGAAGGGC  
GGCTCCAAGGCGCTGACCAAGAAGCTGGAAGAATTGAAGCGCGAGGCGCTGTTCGCGCTTC  
GAC

>CFBP2731 *Xylophilus ampelinus*

CACGCCGGCGGCAAGTTCAACCAGAACAGCTACAAGGTCTCGGGCGGCCTGCACGGCGTG  
GGCGTGAGTTGCGTCAACGCGCTCAGCAAGATGCTGCGCCTGACGGTGCGGCGCGACGGC  
AAGGTCCACGTGCTGGAGTTCAGCAAGGGCTTCGTGCAGAACCGCATCGTCGAGCAGGCG  
GGCGGCGTCGAGGTCTCGCCGATGCGCATCATGGGCGACACCGAGAAGCGCGGTACCGAG  
GTGCACTTCCTGCCCCACAACGAGATCTTCAAGGAAAACGCCGATTTCCACTACGAGATC  
CTGGCCAAGCGCCTGCGCGAACTGAGCTTCCTGAACAACGGCGTGCGCATCCGCCTGAAG  
GACGAGCGCAGCGGCAAGGAAGACGATTTCTCCGGCGCCGGCGGCGTGACAGGGTTTCGT  
GAATTCATCAACAAGGGCAAGACCATCCTGCACCCACGCCCTTCTACGCCGCGGGCGAG  
AAGCCGGCCGAGACGTACGGCGGCATCCCCGGCACGCACATCGGCGTGGAAGTGTTCGATG  
CAGTGGAACAGCGGCTACACCGAGCAGGTGCTCTGTTTCACCAACAACATCCCGCAGCGC  
GACGGCGGCACCCACCTGACCGGCCTGCGCGCCGCGATGACCCGGATCATCAACAAGTAC  
ATCGAAGAAAACGAGCTGGCCAAGAAGGCCAAGGTCGAGGTAACCGGCGACGACATGCGC  
GAAGAAGAGGACATGGCCAAGCGCCGTTTCGCGCCTGAAGGCGTTGATCACGCTCGGCAAG  
ACCCGCGGCTACCTGACGCAGGTCGAGATCTCCGACCACCTGCCCCACAAGCTGGTTCGAC  
GCCGAGACGATGGAAGTCGTGATCGCCATGTTGAACGACATGGGCATCGCGGTCTACGAG  
CAGACGCCCCGACGCCGAGACGCTGTTCCAGAACAACGTCACCCCCACCGCCGCCACTGTC  
GAGGAAGCCGAGGAAGAAGCCGAGGCCGCGCTCTCCACCGTCGACAGCGAATTTCGGCCGC  
ACCACCGACCCGGTCCGCATGTACATGCGCGAAATGGGCACCGTCGAGCTGCTGACCCGC

GAAGGCGAGATCGAGATCGCCAAGCGCATCGAAGGCGGCCTGCAGGCCATGATGGAGGCG  
ATCAGCGCGTCGCCCCGCCACCATCGCCGCGATCCTGGTGATGGGCGAGGACATCCGCGAA  
GGCAAGGTCGTTCATCTCGACCATCGTCGACGGCTTCTCCAACCCCAACGAAGCCGACGAC  
TACGTGGCCGAGGAGGACTTCGACGAGTTCGACGAGGAAGACGACGACGACGCGCAAGGGC  
GGCTCCAAGGCGCTGACCAAGAAGCTGGAAGAATTGAAGCGCGAGGCGCTGTCGCGCTTC  
GAC

>CFBP2748 *Xylophilus ampelinus*

CACGCCGGCGGCAAGTTCAACCAGAACAGCTACAAGGTCTCGGGCGGCCTGCACGGCGTG  
GGCGTGAGTTGCGTCAACGCGCTCAGCAAGATGCTGCGCCTGACGGTGCGGCGCGACGGC  
AAGGTCCACGTGCTGGAGTTCAGCAAGGGCTTCGTGCAGAACCGCATCGTCGAGCAGGCG  
GGCGGCGTCGAGGTCTCGCCGATGCGCATCATGGGCGACACCGAGAAGCGCGGTACCGAG  
GTGCACTTCTGCCCCGACAACGAGATCTTCAAGGAAAACGCCGATTTCCACTACGAGATC  
CTGGCCAAGCGCCTGCGCGAACTGAGCTTCTTGAACAACGGCGTGCGCATCCGCCTGAAG  
GACGAGCGCAGCGGCAAGGAAGACGATTTCTCCGGCGCCGGCGGCGTGCGAGGGTTTTCTC  
GAATTCATCAACAAGGGCAAGACCATCCTGCACCCACGCCCTTCTACGCCGCGGGCGAG  
AAGCCGGCCGAGACGTACGGCGGCATCCCCGGCACGCACATCGGCGTGGAAGTGTTCGATG  
CAGTGGAACAGCGGCTACACCGAGCAGGTGCTCTGTTTCACCAACAACATCCCGCAGCGC  
GACGGCGGCACCCACCTGACCGGCCTGCGCGCCGCGATGACCCGGATCATCAACAAGTAC  
ATCGAAGAAAACGAGCTGGCCAAGAAGGCCAAGGTTCGAGGTAACCGGCGACGACATGCGC  
GAAGAAGAGGACATGGCCAAGCGCCGTTTCGCGCCTGAAGGCGTTGATCACGCTCGGCAAG  
ACCCGCGGTACCTGACGCGAGTTCGAGATCTCCGACCACCTGCCCCGACAAGCTGGTCGAC  
GCCGAGACGATGGAAGTCGTGATCGCCATGTTGAACGACATGGGCATCGCGGTCTACGAG  
CAGACGCCCCGACGCCGAGACGCTGTTCCAGAACAACGTCACCCCCACCGCCGCCACTGTC  
GAGGAAGCCGAGGAAGAAGCCGAGGCCGCGCTCTCCACCGTCGACAGCGAATTTCGGCCGC  
ACCACCGACCCGGTCCGCATGTACATGCGCGAAATGGGCACCGTCGAGCTGCTGACCCGC  
GAAGGCGAGATCGAGATCGCCAAGCGCATCGAAGGCGGCCTGCAGGCCATGATGGAGGCG  
ATCAGCGCGTCGCCCCGCCACCATCGCCGCGATCCTGGTGATGGGCGAGGACATCCGCGAA  
GGCAAGGTCGTTCATCTCGACCATCGTCGACGGCTTCTCCAACCCCAACGAAGCCGACGAC  
TACGTGGCCGAGGAGGACTTCGACGAGTTCGACGAGGAAGACGACGACGACGCGCAAGGGC  
GGCTCCAAGGCGCTGACCAAGAAGCTGGAAGAATTGAAGCGCGAGGCGCTGTCGCGCTTC  
GAC

>CFBP2875 *Xylophilus ampelinus*

CACGCCGGCGGCAAGTTCAACCAGAACAGCTACAAGGTCTCGGGCGGCCTGCACGGCGTG  
GGCGTGAGTTGCGTCAACGCGCTCAGCAAGATGCTGCGCCTGACGGTGCGGCGCGACGGC  
AAGGTCCACGTGCTGGAGTTCAGCAAGGGCTTCGTGCAGAACCGCATCGTCGAGCAGGCG  
GGCGGCGTCGAGGTCTCGCCGATGCGCATCATGGGCGACACCGAGAAGCGCGGTACCGAG  
GTGCACTTCTGCCCCGACAACGAGATCTTCAAGGAAAACGCCGATTTCCACTACGAGATC  
CTGGCCAAGCGCCTGCGCGAACTGAGCTTCTTGAACAACGGCGTGCGCATCCGCCTGAAG  
GACGAGCGCAGCGGCAAGGAAGACGATTTCTCCGGCGCCGGCGGCGTGCGAGGGTTTTCTC  
GAATTCATCAACAAGGGCAAGACCATCCTGCACCCACGCCCTTCTACGCCGCGGGCGAG  
AAGCCGGCCGAGACGTACGGCGGCATCCCCGGCACGCACATCGGCGTGGAAGTGTTCGATG  
CAGTGGAACAGCGGCTACACCGAGCAGGTGCTCTGTTTCACCAACAACATCCCGCAGCGC  
GACGGCGGCACCCACCTGACCGGCCTGCGCGCCGCGATGACCCGGATCATCAACAAGTAC  
ATCGAAGAAAACGAGCTGGCCAAGAAGGCCAAGGTTCGAGGTAACCGGCGACGACATGCGC  
GAAGAAGAGGACATGGCCAAGCGCCGTTTCGCGCCTGAAGGCGTTGATCACGCTCGGCAAG  
ACCCGCGGTACCTGACGCGAGTTCGAGATCTCCGACCACCTGCCCCGACAAGCTGGTCGAC  
GCCGAGACGATGGAAGTCGTGATCGCCATGTTGAACGACATGGGCATCGCGGTCTACGAG  
CAGACGCCCCGACGCCGAGACGCTGTTCCAGAACAACGTCACCCCCACCGCCGCCACTGTC  
GAGGAAGCCGAGGAAGAAGCCGAGGCCGCGCTCTCCACCGTCGACAGCGAATTTCGGCCGC  
ACCACCGACCCGGTCCGCATGTACATGCGCGAAATGGGCACCGTCGAGCTGCTGACCCGC  
GAAGGCGAGATCGAGATCGCCAAGCGCATCGAAGGCGGCCTGCAGGCCATGATGGAGGCG  
ATCAGCGCGTCGCCCCGCCACCATCGCCGCGATCCTGGTGATGGGCGAGGACATCCGCGAA  
GGCAAGGTCGTTCATCTCGACCATCGTCGACGGCTTCTCCAACCCCAACGAAGCCGACGAC  
TACGTGGCCGAGGAGGACTTCGACGAGTTCGACGAGGAAGACGACGACGACGCGCAAGGGC  
GGCTCCAAGGCGCTGACCAAGAAGCTGGAAGAATTGAAGCGCGAGGCGCTGTCGCGCTTC  
GAC

>CFBP2876 *Xylophilus ampelinus*

CACGCCGGCGGCAAGTTCAACCAGAACAGCTACAAGGTCTCGGGCGGCCTGCACGGCGTG

GGCGTGAGTTGCGTCAACGCGCTCAGCAAGATGCTGCGCCTGACGGTGCGGCGCGACGGC  
AAGGTCCACGTGCTGGAGTTCAGCAAGGGCTTCGTGCAGAACCGCATCGTCGAGCAGGCG  
GGCGGCGTCGAGGTCTCGCCGATGCGCATCATGGGCGACACCGAGAAGCGCGGTACCGAG  
GTGCACTTCCTGCCCAGACAACGAGATCTTCAAGGAAAACGCCGATTTCCACTACGAGATC  
CTGGCCAAGCGCCTGCGCGAACTGAGCTTCTGAACAACGGCGTGCGCATCCGCCTGAAG  
GACGAGCGCAGCGGCAAGGAAGACGATTTCTCCGGCGCCGGCGGCGTGAGGGTTTCGT  
GAATTCATCAACAAGGGCAAGACCATCCTGCACCCACGCCCTTCTACGCCGCGGGCGAG  
AAGCCGGCCGAGACGTACGGCGGCATCCCCGGCAGCACATCGGCGTGGAAGTGTTCGATG  
CAGTGGAACAGCGGCTACACCGAGCAGGTGCTCTGTTTCACCAACAACATCCCCGAGCGC  
GACGGCGGCACCCACCTGACCGGCCTGCGCGCCGCGATGACCCGGATCATCAACAAGTAC  
ATCGAAGAAAACGAGCTGGCCAAGAAGGCCAAGGTTCGAGGTAACCGGCGACGACATGCGC  
GAAGAAGAGGACATGGCCAAGCGCCGTTTCGCGCCTGAAGGCGTTGATCACGCTCGGCAAG  
ACCCGCGGCTACCTGACGCAGGTTCGAGATCTCCGACCACCTGCCCAGACAAGCTGGTTCGAC  
GCCGAGACGATGGAAGTTCGTGATCGCCATGTTGAACGACATGGGCATCGCGGTCTACGAG  
CAGACGCCCCGACGCCGAGACGCTGTTCCAGAACAACGTACCCCCACCGCCGCCACTGTC  
GAGGAAGCCGAGGAAGAAGCCGAGGCCGCGCTCTCCACCGTCGACAGCGAATTTCGGCCGC  
ACCACCGACCCGGTCCGCATGTACATGCGCGAAATGGGCACCGTCGAGCTGCTGACCCGC  
GAAGGCGAGATCGAGATCGCCAAGCGCATCGAAGGCGGCCTGCAGGCCATGATGGAGGCG  
ATCAGCGCGTCGCCCCGCCACCATCGCCGCGATCCTGGTGATGGGCGAGGACATCCGCGAA  
GGCAAGGTCGTATCTCGACCATCGTCGACGGCTTCTCCAACCCCAACGAAGCCGACGAC  
TACGTGGCCGAGGAGGACTTCGACGAGTTCGACGAGGAAGACGACGACGACGGCAAGGGC  
GGCTCCAAGGCGCTGACCAAGAAGCTGGAAGAATTGAAGCGCGAGGCGCTGTTCGCGCTTC  
GAC

>CFBP2877 *Xylophilus ampelinus*

CACGCCGGCGGCAAGTTCAACCAGAACAGCTACAAGGTCTCGGGCGGCCTGCACGGCGTG  
GGCGTGAGTTGCGTCAACGCGCTCAGCAAGATGCTGCGCCTGACGGTGCGGCGCGACGGC  
AAGGTCCACGTGCTGGAGTTCAGCAAGGGCTTCGTGCAGAACCGCATCGTCGAGCAGGCG  
GGCGGCGTCGAGGTCTCGCCGATGCGCATCATGGGCGACACCGAGAAGCGCGGTACCGAG  
GTGCACTTCCTGCCCAGACAACGAGATCTTCAAGGAAAACGCCGATTTCCACTACGAGATC  
CTGGCCAAGCGCCTGCGCGAACTGAGCTTCTGAACAACGGCGTGCGCATCCGCCTGAAG  
GACGAGCGCAGCGGCAAGGAAGACGATTTCTCCGGCGCCGGCGGCGTGAGGGTTTCGT  
GAATTCATCAACAAGGGCAAGACCATCCTGCACCCACGCCCTTCTACGCCGCGGGCGAG  
AAGCCGGCCGAGACGTACGGCGGCATCCCCGGCAGCACATCGGCGTGGAAGTGTTCGATG  
CAGTGGAACAGCGGCTACACCGAGCAGGTGCTCTGTTTCACCAACAACATCCCCGAGCGC  
GACGGCGGCACCCACCTGACCGGCCTGCGCGCCGCGATGACCCGGATCATCAACAAGTAC  
ATCGAAGAAAACGAGCTGGCCAAGAAGGCCAAGGTTCGAGGTAACCGGCGACGACATGCGC  
GAAGAAGAGGACATGGCCAAGCGCCGTTTCGCGCCTGAAGGCGTTGATCACGCTCGGCAAG  
ACCCGCGGCTACCTGACGCAGGTTCGAGATCTCCGACCACCTGCCCAGACAAGCTGGTTCGAC  
GCCGAGACGATGGAAGTTCGTGATCGCCATGTTGAACGACATGGGCATCGCGGTCTACGAG  
CAGACGCCCCGACGCCGAGACGCTGTTCCAGAACAACGTACCCCCACCGCCGCCACTGTC  
GAGGAAGCCGAGGAAGAAGCCGAGGCCGCGCTCTCCACCGTCGACAGCGAATTTCGGCCGC  
ACCACCGACCCGGTCCGCATGTACATGCGCGAAATGGGCACCGTCGAGCTGCTGACCCGC  
GAAGGCGAGATCGAGATCGCCAAGCGCATCGAAGGCGGCCTGCAGGCCATGATGGAGGCG  
ATCAGCGCGTCGCCCCGCCACCATCGCCGCGATCCTGGTGATGGGCGAGGACATCCGCGAA  
GGCAAGGTCGTATCTCGACCATCGTCGACGGCTTCTCCAACCCCAACGAAGCCGACGAC  
TACGTGGCCGAGGAGGACTTCGACGAGTTCGACGAGGAAGACGACGACGACGGCAAGGGC  
GGCTCCAAGGCGCTGACCAAGAAGCTGGAAGAATTGAAGCGCGAGGCGCTGTTCGCGCTTC  
GAC

>CFBP3478 *Xylophilus ampelinus*

CACGCCGGCGGCAAGTTCAACCAGAACAGCTACAAGGTCTCGGGCGGCCTGCACGGCGTG  
GGCGTGAGTTGCGTCAACGCGCTCAGCAAGATGCTGCGCCTGACGGTGCGGCGCGACGGC  
AAGGTCCACGTGCTGGAGTTCAGCAAGGGCTTCGTGCAGAACCGCATCGTCGAGCAGGCG  
GGCGGCGTCGAGGTCTCGCCGATGCGCATCATGGGCGACACCGAGAAGCGCGGTACCGAG  
GTGCACTTCCTGCCCAGACAACGAGATCTTCAAGGAAAACGCCGATTTCCACTACGAGATC  
CTGGCCAAGCGCCTGCGCGAACTGAGCTTCTGAACAACGGCGTGCGCATCCGCCTGAAG  
GACGAGCGCAGCGGCAAGGAAGACGATTTCTCCGGCGCCGGCGGCGTGAGGGTTTCGT  
GAATTCATCAACAAGGGCAAGACCATCCTGCACCCACGCCCTTCTACGCCGCGGGCGAG  
AAGCCGGCCGAGACGTACGGCGGCATCCCCGGCAGCACATCGGCGTGGAAGTGTTCGATG

CAGTGGAAACAGCGGCTACACCGAGCAGGTGCTCTGTTTCACCAACAACATCCCCGACGCG  
GACGGCGGCACCCACCTGACCGGCCTGCGCGCCGCGATGACCCGGATCATCAACAAGTAC  
ATCGAAGAAAACGAGCTGGCCAAGAAGGCCAAGGTCGAGGTAACCGGCGACGACATGCGC  
GAAGAAGAGGACATGGCCAAGCGCCGTTTCGCGCCTGAAGGCGTTGATCACGCTCGGCAAG  
ACCCGCGGCTACCTGACGCAGGTCGAGATCTCCGACCACCTGCCCCACAAGCTGGTTCGAC  
GCCGAGACGATGGAAGTCGTGATCGCCATGTTGAACGACATGGGCATCGCGGTCTACGAG  
CAGACGCCCCGACGCCGAGACGCTGTTCCAGAACAACGTCACCCCCACCGCCGCCACTGTC  
GAGGAAGCCGAGGAAGAAGCCGAGGCCGCGCTCTCCACCGTCGACAGCGAATTTCGGCCGC  
ACCACCGACCCGGTCCGCATGTACATGCGCGAAATGGGCACCGTCGAGCTGCTGACCCGC  
GAAGGCGAGATCGAGATCGCCAAGCGCATCGAAGGCGGCCTGCAGGCCATGATGGAGGCG  
ATCAGCGCGTCGCCCCGCCACCATCGCCGCGATCCTGGTGATGGGCGAGGACATCCGCGAA  
GGCAAGGTCGTATCTCGACCATCGTCGACGGCTTCTCCAACCCCAACGAAGCCGACGAC  
TACGTGGCCGAGGAGGACTTCGACGAGTTCGACGAGGAAGACGACGACGACGGAAGGGC  
GGCTCCAAGGCGCTGACCAAGAAGCTGGAAGAATTGAAGCGCGAGGCGCTGTTCGCGCTTC  
GAC

>CFBP3674T *Xylophilus ampelinus*

CACGCCGGCGGCAAGTTCAACCAGAACAGCTACAAGGTCTCGGGCGGCCTGCACGGCGTG  
GGCGTGAGTTGCGTCAACGCGCTCAGCAAGATGCTGCGCCTGACGGTGCGGCGCGACGGC  
AAGGTCCACGTGCTGGAGTTCAGCAAGGGCTTCGTGCAGAACCGCATCGTCGAGCAGGCG  
GGCGGCGTCGAGGTCTCGCCGATGCGCATCATGGGCGACACCGAGAAGCGCGGTACCGAG  
GTGCACTTCCTGCCCCGACAACGAGATCTTCAAGGAAAACGCCGATTTCCACTACGAGATC  
CTGGCCAAGCGCCTGCGCGAACTGAGCTTCTGAACAACGGCGTGCGCATCCGCCTGAAG  
GACGAGCGCAGCGGCAAGGAAGACGATTTCTCCGGCGCCGGCGGCGTGAGGGTTTCGTTC  
GAATTCATCAACAAGGGCAAGACCATCCTGCACCCACGCCCTTCTACGCCGCGGGCGAG  
AAGCCGGCCGAGACGTACGGCGGCATCCCCGGCACGCACATCGGCGTGGAAGTGTTCGATG  
CAGTGGAAACAGCGGCTACACCGAGCAGGTGCTCTGTTTCACCAACAACATCCCCGACGCG  
GACGGCGGCACCCACCTGACCGGCCTGCGCGCCGCGATGACCCGGATCATCAACAAGTAC  
ATCGAAGAAAACGAGCTGGCCAAGAAGGCCAAGGTCGAGGTAACCGGCGACGACATGCGC  
GAAGAAGAGGACATGGCCAAGCGCCGTTTCGCGCCTGAAGGCGTTGATCACGCTCGGCAAG  
ACCCGCGGCTACCTGACGCAGGTCGAGATCTCCGACCACCTGCCCCACAAGCTGGTTCGAC  
GCCGAGACGATGGAAGTCGTGATCGCCATGTTGAACGACATGGGCATCGCGGTCTACGAG  
CAGACGCCCCGACGCCGAGACGCTGTTCCAGAACAACGTCACCCCCACCGCCGCCACTGTC  
GAGGAAGCCGAGGAAGAAGCCGAGGCCGCGCTCTCCACCGTCGACAGCGAATTTCGGCCGC  
ACCACCGACCCGGTCCGCATGTACATGCGCGAAATGGGCACCGTCGAGCTGCTGACCCGC  
GAAGGCGAGATCGAGATCGCCAAGCGCATCGAAGGCGGCATGCAGGCCATGATGGAGGCG  
ATCAGCGCGTCGCCCCGCCACCATCGCCGCGATCCTGGTGATGGGCGAGGACATCCGCGAA  
GGCAAGGTCGTATCTCGACCATCGTCGACGGCTTCTCCAACCCCAACGAAGCCGACGAC  
TACGTGGCCGAGGAGGACTTCGACGAGTTCGACGAGGAAGACGACGACGACGGAAGGGC  
GGCTCCAAGGCGCTGACCAAGAAGCTGGAAGAATTGAAGCGCGAGGCGCTGTTCGCGCTTC  
GAC

>CFBP3675 *Xylophilus ampelinus*

CACGCCGGCGGCAAGTTCAACCAGAACAGCTACAAGGTCTCGGGCGGCCTGCACGGCGTG  
GGCGTGAGTTGCGTCAACGCGCTCAGCAAGATGCTGCGCCTGACGGTGCGGCGCGACGGC  
AAGGTCCACGTGCTGGAGTTCAGCAAGGGCTTCGTGCAGAACCGCATCGTCGAGCAGGCG  
GGCGGCGTCGAGGTCTCGCCGATGCGCATCATGGGCGACACCGAGAAGCGCGGTACCGAG  
GTGCACTTCCTGCCCCGACAACGAGATCTTCAAGGAAAACGCCGATTTCCACTACGAGATC  
CTGGCCAAGCGCCTGCGCGAACTGAGCTTCTGAACAACGGCGTGCGCATCCGCCTGAAG  
GACGAGCGCAGCGGCAAGGAAGACGATTTCTCCGGCGCCGGCGGCGTGAGGGTTTCGTTC  
GAATTCATCAACAAGGGCAAGACCATCCTGCACCCACGCCCTTCTACGCCGCGGGCGAG  
AAGCCGGCCGAGACGTACGGCGGCATCCCCGGCACGCACATCGGCGTGGAAGTGTTCGATG  
CAGTGGAAACAGCGGCTACACCGAGCAGGTGCTCTGTTTCACCAACAACATCCCCGACGCG  
GACGGCGGCACCCACCTGACCGGCCTGCGCGCCGCGATGACCCGGATCATCAACAAGTAC  
ATCGAAGAAAACGAGCTGGCCAAGAAGGCCAAGGTCGAGGTAACCGGCGACGACATGCGC  
GAAGAAGAGGACATGGCCAAGCGCCGTTTCGCGCCTGAAGGCGTTGATCACGCTCGGCAAG  
ACCCGCGGCTACCTGACGCAGGTCGAGATCTCCGACCACCTGCCCCACAAGCTGGTTCGAC  
GCCGAGACGATGGAAGTCGTGATCGCCATGTTGAACGACATGGGCATCGCGGTCTACGAG  
CAGACGCCCCGACGCCGAGACGCTGTTCCAGAACAACGTCACCCCCACCGCCGCCACTGTC  
GAGGAAGCCGAGGAAGAAGCCGAGGCCGCGCTCTCCACCGTCGACAGCGAATTTCGGCCGC

ACCACCGACCCGGTCCGCATGTACATGCGCGAAATGGGCACCGTCGAGCTGCTGACCCGC  
GAAGGCGAGATCGAGATCGCCAAGCGCATCGAAGGCGGCATGCAGGCCATGATGGAGGCG  
ATCAGCGCGTCGCCCCGCCACCATCGCCGCGATCCTGGTGATGGGCGAGGACATCCGCGAA  
GGCAAGGTCGTTCATCTCGACCATCGTCGACGGCTTCTCCAACCCCAACGAAGCCGACGAC  
TACGTGGCCGAGGAGGACTTCGACGAGTTCGACGAGGAAGACGACGACGACGCGCAAGGGC  
GGCTCCAAGGCGCTGACCAAGAAGCTGGAAGAATTGAAGCGCGAGGCGCTGTTCGCGCTTC  
GAC

>CFBP3677 *Xylophilus ampelinus*

CACGCCGGCGGCAAGTTCAACCAGAACAGCTACAAGGTCTCGGGCGGCCTGCACGGCGTG  
GGCGTGAGTTGCGTCAACGCGCTCAGCAAGATGCTGCGCCTGACGGTGCGGCGCGACGGC  
AAGGTCCACGTGCTGGAGTTCAGCAAGGGCTTCGTGCAGAACCGCATCGTCGAGCAGGCG  
GGCGGCGTCGAGGTCTCGCCGATGCGCATCATGGGCGACACCGAGAAGCGCGGTACCGAG  
GTGCACTTCTGCCCCGACAACGAGATCTTCAAGGAAAACGCCGATTTCCACTACGAGATC  
CTGGCCAAGCGCCTGCGCGAACTGAGCTTCTTGAACAACGGCGTGCGCATCCGCCTGAAG  
GACGAGCGCAGCGGCAAGGAAGACGATTTCTCCGGCGCCGGCGGCGTGACGGGTTTCGTTC  
GAATTCATCAACAAGGGCAAGACCATCCTGCACCCACGCCCTTCTACGCCGCGGGCGAG  
AAGCCGGCCGAGACGTACGGCGGCATCCCCGGCACGCACATCGGCGTGGAAGTGTTCGATG  
CAGTGGAACAGCGGCTACACCGAGCAGGTGCTCTGTTTCACCAACAACATCCCGCAGCGC  
GACGGCGGCACCCACCTGACCGGCCTGCGCGCCGCGATGACCCGGATCATCAACAAGTAC  
ATCGAAGAAAACGAGCTGGCCAAGAAGGCCAAGGTTCGAGGTAACCGGCGACGACATGCGC  
GAAGAAGAGGACATGGCCAAGCGCCGTTTCGCGCCTGAAGGCGTTGATCACGCTCGGCAAG  
ACCCGCGGCTACCTGACGCGAGGTCGAGATCTCCGACCACCTGCCCCGACAAGCTGGTCGAC  
GCCGAGACGATGGAAGTTCGTGATCGCCATGTTGAACGACATGGGCATCGCGGTCTACGAG  
CAGACGCCCCGACGCCGAGACGCTGTTCCAGAACAACGTCACCCCCACCGCCGCCACTGTC  
GAGGAAGCCGAGGAAGAAGCCGAGGCCGCGCTCTCCACCGTCGACAGCGAATTTCGGCCGC  
ACCACCGACCCGGTCCGCATGTACATGCGCGAAATGGGCACCGTCGAGCTGCTGACCCGC  
GAAGGCGAGATCGAGATCGCCAAGCGCATCGAAGGCGGCATGCAGGCCATGATGGAGGCG  
ATCAGCGCGTCGCCCCGCCACCATCGCCGCGATCCTGGTGATGGGCGAGGACATCCGCGAA  
GGCAAGGTCGTTCATCTCGACCATCGTCGACGGCTTCTCCAACCCCAACGAAGCCGACGAC  
TACGTGGCCGAGGAGGACTTCGACGAGTTCGACGAGGAAGACGACGACGACGCGCAAGGGC  
GGCTCCAAGGCGCTGACCAAGAAGCTGGAAGAATTGAAGCGCGAGGCGCTGTTCGCGCTTC  
GAC

>CFBP3678 *Xylophilus ampelinus*

CACGCCGGCGGCAAGTTCAACCAGAACAGCTACAAGGTCTCGGGCGGCCTGCACGGCGTG  
GGCGTGAGTTGCGTCAACGCGCTCAGCAAGATGCTGCGCCTGACGGTGCGGCGCGACGGC  
AAGGTCCACGTGCTGGAGTTCAGCAAGGGCTTCGTGCAGAACCGCATCGTCGAGCAGGCG  
GGCGGCGTCGAGGTCTCGCCGATGCGCATCATGGGCGACACCGAGAAGCGCGGTACCGAG  
GTGCACTTCTGCCCCGACAACGAGATCTTCAAGGAAAACGCCGATTTCCACTACGAGATC  
CTGGCCAAGCGCCTGCGCGAACTGAGCTTCTTGAACAACGGCGTGCGCATCCGCCTGAAG  
GACGAGCGCAGCGGCAAGGAAGACGATTTCTCCGGCGCCGGCGGCGTGACGGGTTTCGTTC  
GAATTCATCAACAAGGGCAAGACCATCCTGCACCCACGCCCTTCTACGCCGCGGGCGAG  
AAGCCGGCCGAGACGTACGGCGGCATCCCCGGCACGCACATCGGCGTGGAAGTGTTCGATG  
CAGTGGAACAGCGGCTACACCGAGCAGGTGCTCTGTTTCACCAACAACATCCCGCAGCGC  
GACGGCGGCACCCACCTGACCGGCCTGCGCGCCGCGATGACCCGGATCATCAACAAGTAC  
ATCGAAGAAAACGAGCTGGCCAAGAAGGCCAAGGTTCGAGGTAACCGGCGACGACATGCGC  
GAAGAAGAGGACATGGCCAAGCGCCGTTTCGCGCCTGAAGGCGTTGATCACGCTCGGCAAG  
ACCCGCGGCTACCTGACGCGAGTTCGAGATCTCCGACCACCTGCCCCGACAAGCTGGTCGAC  
GCCGAGACGATGGAAGTTCGTGATCGCCATGTTGAACGACATGGGCATCGCGGTCTACGAG  
CAGACGCCCCGACGCCGAGACGCTGTTCCAGAACAACGTCACCCCCACCGCCGCCACTGTC  
GAGGAAGCCGAGGAAGAAGCCGAGGCCGCGCTCTCCACCGTCGACAGCGAATTTCGGCCGC  
ACCACCGACCCGGTCCGCATGTACATGCGCGAAATGGGCACCGTCGAGCTGCTGACCCGC  
GAAGGCGAGATCGAGATCGCCAAGCGCATCGAAGGCGGCATGCAGGCCATGATGGAGGCG  
ATCAGCGCGTCGCCCCGCCACCATCGCCGCGATCCTGGTGATGGGCGAGGACATCCGCGAA  
GGCAAGGTCGTTCATCTCGACCATCGTCGACGGCTTCTCCAACCCCAACGAAGCCGACGAC  
TACGTGGCCGAGGAGGACTTCGACGAGTTCGACGAGGAAGACGACGACGACGCGCAAGGGC  
GGCTCCAAGGCGCTGACCAAGAAGCTGGAAGAATTGAAGCGCGAGGCGCTGTTCGCGCTTC  
GAC

>CFBP3679 *Xylophilus ampelinus*

CACGCCGGCGGCAAGTTCAACCAGAACAGCTACAAGGTCTCGGGCGGCCTGCACGGCGTG  
GGCGTGAGTTGCGTCAACGCGCTCAGCAAGATGCTGCGCCTGACGGTGCGGCGCGACGGC  
AAGGTCCACGTGCTGGAGTTCAGCAAGGGCTTCGTGCAGAACCGCATCGTCGAGCAGGCG  
GGCGGCGTCGAGGTCTCGCCGATGCGCATCATGGGCGACACCGAGAAGCGCGGTACCGAG  
GTGCACTTCCTGCCCAGACAACGAGATCTTCAAGGAAAACGCCGATTTCCACTACGAGATC  
CTGGCCAAGCGCCTGCGCGAACTGAGCTTCTGAACAACGGCGTGCGCATCCGCCTGAAG  
GACGAGCGCAGCGGCAAGGAAGACGATTTCTCCGGCGCCGGCGGCGTGAGGGTTTCGT  
GAATTCATCAACAAGGGCAAGACCATCCTGCACCCACGCCCTTCTACGCCGCGGGCGAG  
AAGCCGGCCGAGACGTACGGCGGCATCCCCGGCACGCACATCGGCGTGGAAGTGTGATG  
CAGTGGAACAGCGGCTACACCGAGCAGGTGCTCTGTTTCACCAACAACATCCCGCAGCGC  
GACGGCGGCACCCACCTGACCGGCCTGCGCGCCGCGATGACCCGGATCATCAACAAGTAC  
ATCGAAGAAAACGAGCTGGCCAAGAAGGCCAAGGTGAGGTAACCGGCGACGACATGCGC  
GAAGAAGAGGACATGGCCAAGCGCCGTTTCGCGCCTGAAGGCGTTGATCACGCTCGGCAAG  
ACCCGCGGCTACCTGACGCAGGTGAGATCTCCGACCACCTGCCCAGACAAGCTGGTTCGAC  
GCCGAGACGATGGAAGTCGTGATCGCCATGTTGAACGACATGGGCATCGCGGTCTACGAG  
CAGACGCCCCGACGCCGAGACGCTGTTCCAGAACAACGTACCCCCACCGCCGCCACTGTC  
GAGGAAGCCGAGGAAGAAGCCGAGGCCGCGCTCTCCACCGTCGACAGCGAATTTCGGCCGC  
ACCACCGACCCGGTCCGCATGTACATGCGCGAAATGGGCACCGTCGAGCTGCTGACCCGC  
GAAGGCGAGATCGAGATCGCCAAGCGCATCGAAGGCGGCATGCAGGCCATGATGGAGGCG  
ATCAGCGCGTCGCCCCGCCACCATCGCCGCGATCCTGGTGATGGGCGAGGACATCCGCGAA  
GGCAAGGTCGTATCTCGACCATCGTCGACGGCTTCTCCAACCCCAACGAAGCCGACGAC  
TACGTGGCCGAGGAGGACTTCGACGAGTTCGACGAGGAAGACGACGACGACGGCAAGGGC  
GGCTCCAAGGCGCTGACCAAGAAGCTGGAAGAATTGAAGCGCGAGGCGCTGTGCGGCTTC  
GAC

>CFBP3681 *Xylophilus ampelinus*

CACGCCGGCGGCAAGTTCAACCAGAACAGCTACAAGGTCTCGGGCGGCCTGCACGGCGTG  
GGCGTGAGTTGCGTCAACGCGCTCAGCAAGATGCTGCGCCTGACGGTGCGGCGCGACGGC  
AAGGTCCACGTGCTGGAGTTCAGCAAGGGCTTCGTGCAGAACCGCATCGTCGAGCAGGCG  
GGCGGCGTCGAGGTCTCGCCGATGCGCATCATGGGCGACACCGAGAAGCGCGGTACCGAG  
GTGCACTTCCTGCCCAGACAACGAGATCTTCAAGGAAAACGCCGATTTCCACTACGAGATC  
CTGGCCAAGCGCCTGCGCGAACTGAGCTTCTGAACAACGGCGTGCGCATCCGCCTGAAG  
GACGAGCGCAGCGGCAAGGAAGACGATTTCTCCGGCGCCGGCGGCGTGAGGGTTTCGT  
GAATTCATCAACAAGGGCAAGACCATCCTGCACCCACGCCCTTCTACGCCGCGGGCGAG  
AAGCCGGCCGAGACGTACGGCGGCATCCCCGGCACGCACATCGGCGTGGAAGTGTGATG  
CAGTGGAACAGCGGCTACACCGAGCAGGTGCTCTGTTTCACCAACAACATCCCGCAGCGC  
GACGGCGGCACCCACCTGACCGGCCTGCGCGCCGCGATGACCCGGATCATCAACAAGTAC  
ATCGAAGAAAACGAGCTGGCCAAGAAGGCCAAGGTGAGGTAACCGGCGACGACATGCGC  
GAAGAAGAGGACATGGCCAAGCGCCGTTTCGCGCCTGAAGGCGTTGATCACGCTCGGCAAG  
ACCCGCGGCTACCTGACGCAGGTGAGATCTCCGACCACCTGCCCAGACAAGCTGGTTCGAC  
GCCGAGACGATGGAAGTCGTGATCGCCATGTTGAACGACATGGGCATCGCGGTCTACGAG  
CAGACGCCCCGACGCCGAGACGCTGTTCCAGAACAACGTACCCCCACCGCCGCCACTGTC  
GAGGAAGCCGAGGAAGAAGCCGAGGCCGCGCTCTCCACCGTCGACAGCGAATTTCGGCCGC  
ACCACCGACCCGGTCCGCATGTACATGCGCGAAATGGGCACCGTCGAGCTGCTGACCCGC  
GAAGGCGAGATCGAGATCGCCAAGCGCATCGAAGGCGGCCTGCAGGCCATGATGGAGGCG  
ATCAGCGCGTCGCCCCGCCACCATCGCCGCGATCCTGGTGATGGGCGAGGACATCCGCGAA  
GGCAAGGTCGTATCTCGACCATCGTCGACGGCTTCTCCAACCCCAACGAAGCCGACGAC  
TACGTGGCCGAGGAGGACTTCGACGAGTTCGACGAGGAAGACGACGACGACGGCAAGGGC  
GGCTCCAAGGCGCTGACCAAGAAGCTGGAAGAATTGAAGCGCGAGGCGCTGTGCGGCTTC  
GAC

>CFBP3682 *Xylophilus ampelinus*

CACCCGGCGGCAAGTTCAACCAGAACAGCTACAAGGTCTCGGGCGGCCTGCACGGCGTG  
GGCGTGAGTTGCGTCAACGCGCTCAGCAAGATGCTGCGCCTGACGGTGCGGCGCGACGGC  
AAGGTCCACGTGCTGGAGTTCAGCAAGGGCTTCGTGCAGAACCGCATCGTCGAGCAGGCG  
GGCGGCGTCGAGGTCTCGCCGATGCGCATCATGGGCGACACCGAGAAGCGCGGTACCGAG  
GTGCACTTCCTGCCCAGACAACGAGATCTTCAAGGAAAACGCCGATTTCCACTACGAGATC  
CTGGCCAAGCGCCTGCGCGAACTGAGCTTCTGAACAACGGCGTGCGCATCCGCCTGAAG  
GACGAGCGCAGCGGCAAGGAAGACGATTTCTCCGGCGCCGGCGGCGTGAGGGTTTCGT  
GAATTCATCAACAAGGGCAAGACCATCCTGCACCCACGCCCTTCTACGCCGCGGGCGAG



AAGCCGGCCGAGACGTACGGCGGCATCCCCGGCACGCACATCGGCGTGGAAGTGTGATG  
CAGTGGAACAGCGGCTACACCGAGCAGGTGCTCTGTTTCACCAACAACATCCCGCAGCGC  
GACGGCGGCACCCACCTGACCGGCCTGCGCGCCGCGATGACCCGGATCATCAACAAGTAC  
ATCGAAGAAAACGAGCTGGCCAAGAAGGCCAAGGTCGAGGTAACCGGCGACGACATGCGC  
GAAGAAGAGGACATGGCCAAGCGCCGTTTCGCGCCTGAAGGCGTTGATCACGCTCGGCAAG  
ACCCGCGGCTACCTGACGCAGGTCGAGATCTCCGACCACCTGCCCCACAAGCTGGTTCGAC  
GCCGAGACGATGGAAGTCGTGATCGCCATGTTGAACGACATGGGCATCGCGGTCTACGAG  
CAGACGCCCCGACGCCGAGACGCTGTTCCAGAACAACGTCACCCCCACCGCCGCCACTGTC  
GAGGAAGCCGAGGAAGAAGCCGAGGCCGCGCTCTCCACCGTCGACAGCGAATTTCGGCCGC  
ACCACCGACCCGGTCCGCATGTACATGCGCGAAATGGGCACCGTCGAGCTGCTGACCCGC  
GAAGGCGAGATCGAGATCGCCAAGCGCATCGAAGGCGGCATGCAGGCCATGATGGAGGCG  
ATCAGCGCGTCGCCCCGCCACCATCGCCGCGATCCTGGTGATGGGCGAGGACATCCGCGAA  
GGCAAGGTCGTATCTCGACCATCGTCGACGGCTTCTCCAACCCCAACGAAGCCGACGAC  
TACGTGGCCGAGGAGGACTTCGACGAGTTCGACGAGGAAGACGACGACGACGGCAAGGGC  
GGCTCCAAGGCGCTGACCAAGAAGCTGGAAGAATTGAAGCGCGAGGCGCTGTTCGCGCTTC  
GAC

>CFBP3683 *Xylophilus ampelinus*

CACGCCGGCGGCAAGTTCAACCAGAACAGCTACAAGGTCTCGGGCGGCCTGCACGGCGTG  
GGCGTGAGTTGCGTCAACGCGCTCAGCAAGATGCTGCGCCTGACGGTGCGGCGCGACGGC  
AAGGTCCACGTGCTGGAGTTCAGCAAGGGCTTCGTGCAGAACCGCATCGTCGAGCAGGCG  
GGCGGCGTCGAGGTCTCGCCGATGCGCATCATGGGCGACACCGAGAAGCGCGGTACCGAG  
GTGCACTTCCTGCCCCGACAACGAGATCTTCAAGGAAAACGCCGATTTCCACTACGAGATC  
CTGGCCAAGCGCCTGCGCGAACTGAGCTTCCTGAACAACGGCGTGCGCATCCGCCTGAAG  
GACGAGCGCAGCGGCAAGGAAGACGATTTCTCCGGCGCCGGCGGCGTGAGGGTTTCGTC  
GAATTCATCAACAAGGGCAAGACCATCCTGCACCCACGCCCTTCTACGCCGCGGGCGAG  
AAGCCGGCCGAGACGTACGGCGGCATCCCCGGCACGCACATCGGCGTGGAAGTGTGATG  
CAGTGGAACAGCGGCTACACCGAGCAGGTGCTCTGTTTCACCAACAACATCCCGCAGCGC  
GACGGCGGCACCCACCTGACCGGCCTGCGCGCCGCGATGACCCGGATCATCAACAAGTAC  
ATCGAAGAAAACGAGCTGGCCAAGAAGGCCAAGGTCGAGGTAACCGGCGACGACATGCGC  
GAAGAAGAGGACATGGCCAAGCGCCGTTTCGCGCCTGAAGGCGTTGATCACGCTCGGCAAG  
ACCCGCGGCTACCTGACGCAGGTCGAGATCTCCGACCACCTGCCCCACAAGCTGGTTCGAC  
GCCGAGACGATGGAAGTCGTGATCGCCATGTTGAACGACATGGGCATCGCGGTCTACGAG  
CAGACGCCCCGACGCCGAGACGCTGTTCCAGAACAACGTCACCCCCACCGCCGCCACTGTC  
GAGGAAGCCGAGGAAGAAGCCGAGGCCGCGCTCTCCACCGTCGACAGCGAATTTCGGCCGC  
ACCACCGACCCGGTCCGCATGTACATGCGCGAAATGGGCACCGTCGAGCTGCTGACCCGC  
GAAGGCGAGATCGAGATCGCCAAGCGCATCGAAGGCGGCATGCAGGCCATGATGGAGGCG  
ATCAGCGCGTCGCCCCGCCACCATCGCCGCGATCCTGGTGATGGGCGAGGACATCCGCGAA  
GGCAAGGTCGTATCTCGACCATCGTCGACGGCTTCTCCAACCCCAACGAAGCCGACGAC  
TACGTGGCCGAGGAGGACTTCGACGAGTTCGACGAGGAAGACGACGACGACGGCAAGGGC  
GGCTCCAAGGCGCTGACCAAGAAGCTGGAAGAATTGAAGCGCGAGGCGCTGTTCGCGCTTC  
GAC

>CFBP3684 *Xylophilus ampelinus*

CACGCCGGCGGCAAGTTCAACCAGAACAGCTACAAGGTCTCGGGCGGCCTGCACGGCGTG  
GGCGTGAGTTGCGTCAACGCGCTCAGCAAGATGCTGCGCCTGACGGTGCGGCGCGACGGC  
AAGGTCCACGTGCTGGAGTTCAGCAAGGGCTTCGTGCAGAACCGCATCGTCGAGCAGGCG  
GGCGGCGTCGAGGTCTCGCCGATGCGCATCATGGGCGACACCGAGAAGCGCGGTACCGAG  
GTGCACTTCCTGCCCCGACAACGAGATCTTCAAGGAAAACGCCGATTTCCACTACGAGATC  
CTGGCCAAGCGCCTGCGCGAACTGAGCTTCCTGAACAACGGCGTGCGCATCCGCCTGAAG  
GACGAGCGCAGCGGCAAGGAAGACGATTTCTCCGGCGCCGGCGGCGTGAGGGTTTCGTC  
GAATTCATCAACAAGGGCAAGACCATCCTGCACCCACGCCCTTCTACGCCGCGGGCGAG  
AAGCCGGCCGAGACGTACGGCGGCATCCCCGGCACGCACATCGGCGTGGAAGTGTGATG  
CAGTGGAACAGCGGCTACACCGAGCAGGTGCTCTGTTTCACCAACAACATCCCGCAGCGC  
GACGGCGGCACCCACCTGACCGGCCTGCGCGCCGCGATGACCCGGATCATCAACAAGTAC  
ATCGAAGAAAACGAGCTGGCCAAGAAGGCCAAGGTCGAGGTAACCGGCGACGACATGCGC  
GAAGAAGAGGACATGGCCAAGCGCCGTTTCGCGCCTGAAGGCGTTGATCACGCTCGGCAAG  
ACCCGCGGCTACCTGACGCAGGTCGAGATCTCCGACCACCTGCCCCACAAGCTGGTTCGAC  
GCCGAGACGATGGAAGTCGTGATCGCCATGTTGAACGACATGGGCATCGCGGTCTACGAG  
CAGACGCCCCGACGCCGAGACGCTGTTCCAGAACAACGTCACCCCCACCGCCGCCACTGTC

GAGGAAGCCGAGGAAGAAGCCGAGGCCGCGCTCTCCACCGTCGACAGCGAATTTCGGCCGC  
ACCACCGACCCGGTCCGCATGTACATGCGCGAAATGGGCACCGTCGAGCTGCTGACCCGC  
GAAGGCGAGATCGAGATCGCCAAGCGCATCGAAGGCGGCATGCAGGCCATGATGGAGGCG  
ATCAGCGCGTCGCCCCGCCACCATCGCCGCGATCCTGGTGATGGGCGAGGACATCCGCGAA  
GGCAAGGTCGTTCATCTCGACCATCGTCGACGGCTTCTCCAACCCCAACGAAGCCGACGAC  
TACGTGGCCGAGGAGGACTTCGACGAGTTCGACGAGGAAGACGACGACGACGCGCAAGGGC  
GGCTCCAAGGCGCTGACCAAGAAGCTGGAAGAATTGAAGCGCGAGGCGCTGTTCGCGCTTC  
GAC

>CFBP3685 *Xylophilus ampelinus*

CACGCCGGCGGCAAGTTCAACCAGAACAGCTACAAGGTCTCGGGCGGCCTGCACGGCGTG  
GGCGTGAGTTGCGTCAACGCGCTCAGCAAGATGCTGCGCCTGACGGTGCGGCGCGACGGC  
AAGGTCCACGTGCTGGAGTTCAGCAAGGGCTTCGTGCAGAACCGCATCGTCGAGCAGGCG  
GGCGGCGTCGAGGTCTCGCCGATGCGCATCATGGGCGACACCGAGAAGCGCGGTACCGAG  
GTGCACTTCTGCCCCGACAACGAGATCTTCAAGGAAAACGCCGATTTCCACTACGAGATC  
CTGGCCAAGCGCCTGCGCGAACTGAGCTTCTGAACAACGGCGTGCGCATCCGCCTGAAG  
GACGAGCGCAGCGGCAAGGAAGACGATTTCTCCGGCGCCGGCGGCGTGAGGGTTTCGTTC  
GAATTCATCAACAAGGGCAAGACCATCCTGCACCCACGCCCTTCTACGCCGCGGGCGAG  
AAGCCGGCCGAGACGTACGGCGGCATCCCCGGCACGCACATCGGCGTGGAAGTGTTCGATG  
CAGTGGAACAGCGGCTACACCGAGCAGGTGCTCTGTTTCACCAACAACATCCCGCAGCGC  
GACGGCGGCACCCACCTGACCGGCCTGCGCGCCGCGATGACCCGGATCATCAACAAGTAC  
ATCGAAGAAAACGAGCTGGCCAAGAAGGCCAAGGTTCGAGGTAACCGGCGACGACATGCGC  
GAAGAAGAGGACATGGCCAAGCGCCGTTTCGCGCCTGAAGGCGTTGATCACGCTCGGCAAG  
ACCCGCGGCTACCTGACGCAGGTTCGAGATCTCCGACCACCTGCCCCGACAAGCTGGTCGAC  
GCCGAGACGATGGAAGTCGTGATCGCCATGTTGAACGACATGGGCATCGCGGTCTACGAG  
CAGACGCCCCGACCCGAGACGCTGTTCCAGAACAACGTCACCCCCACCGCCGCCACTGTC  
GAGGAAGCCGAGGAAGAAGCCGAGGCCGCGCTCTCCACCGTCGACAGCGAATTTCGGCCGC  
ACCACCGACCCGGTCCGCATGTACATGCGCGAAATGGGCACCGTCGAGCTGCTGACCCGC  
GAAGGCGAGATCGAGATCGCCAAGCGCATCGAAGGCGGCATGCAGGCCATGATGGAGGCG  
ATCAGCGCGTCGCCCCGCCACCATCGCCGCGATCCTGGTGATGGGCGAGGACATCCGCGAA  
GGCAAGGTCGTTCATCTCGACCATCGTCGACGGCTTCTCCAACCCCAACGAAGCCGACGAC  
TACGTGGCCGAGGAGGACTTCGACGAGTTCGACGAGGAAGACGACGACGACGCGCAAGGGC  
GGCTCCAAGGCGCTGACCAAGAAGCTGGAAGAATTGAAGCGCGAGGCGCTGTTCGCGCTTC  
GAC

>CFBP3686 *Xylophilus ampelinus*

CACGCCGGCGGCAAGTTCAACCAGAACAGCTACAAGGTCTCGGGCGGCCTGCACGGCGTG  
GGCGTGAGTTGCGTCAACGCGCTCAGCAAGATGCTGCGCCTGACGGTGCGGCGCGACGGC  
AAGGTCCACGTGCTGGAGTTCAGCAAGGGCTTCGTGCAGAACCGCATCGTCGAGCAGGCG  
GGCGGCGTCGAGGTCTCGCCGATGCGCATCATGGGCGACACCGAGAAGCGCGGTACCGAG  
GTGCACTTCTGCCCCGACAACGAGATCTTCAAGGAAAACGCCGATTTCCACTACGAGATC  
CTGGCCAAGCGCCTGCGCGAACTGAGCTTCTGAACAACGGCGTGCGCATCCGCCTGAAG  
GACGAGCGCAGCGGCAAGGAAGACGATTTCTCCGGCGCCGGCGGCGTGAGGGTTTCGTTC  
GAATTCATCAACAAGGGCAAGACCATCCTGCACCCACGCCCTTCTACGCCGCGGGCGAG  
AAGCCGGCCGAGACGTACGGCGGCATCCCCGGCACGCACATCGGCGTGGAAGTGTTCGATG  
CAGTGGAACAGCGGCTACACCGAGCAGGTGCTCTGTTTCACCAACAACATCCCGCAGCGC  
GACGGCGGCACCCACCTGACCGGCCTGCGCGCCGCGATGACCCGGATCATCAACAAGTAC  
ATCGAAGAAAACGAGCTGGCCAAGAAGGCCAAGGTTCGAGGTAACCGGCGACGACATGCGC  
GAAGAAGAGGACATGGCCAAGCGCCGTTTCGCGCCTGAAGGCGTTGATCACGCTCGGCAAG  
ACCCGCGGCTACCTGACGCAGGTTCGAGATCTCCGACCACCTGCCCCGACAAGCTGGTCGAC  
GCCGAGACGATGGAAGTCGTGATCGCCATGTTGAACGACATGGGCATCGCGGTCTACGAG  
CAGACGCCCCGACCCGAGACGCTGTTCCAGAACAACGTCACCCCCACCGCCGCCACTGTC  
GAGGAAGCCGAGGAAGAAGCCGAGGCCGCGCTCTCCACCGTCGACAGCGAATTTCGGCCGC  
ACCACCGACCCGGTCCGCATGTACATGCGCGAAATGGGCACCGTCGAGCTGCTGACCCGC  
GAAGGCGAGATCGAGATCGCCAAGCGCATCGAAGGCGGCATGCAGGCCATGATGGAGGCG  
ATCAGCGCGTCGCCCCGCCACCATCGCCGCGATCCTGGTGATGGGCGAGGACATCCGCGAA  
GGCAAGGTCGTTCATCTCGACCATCGTCGACGGCTTCTCCAACCCCAACGAAGCCGACGAC  
TACGTGGCCGAGGAGGACTTCGACGAGTTCGACGAGGAAGACGACGACGACGCGCAAGGGC  
GGCTCCAAGGCGCTGACCAAGAAGCTGGAAGAATTGAAGCGCGAGGCGCTGTTCGCGCTTC  
GAC

>CFBP3688 *Xylophilus ampelinus*

CACGCCGGCGGCAAGTTCAACCAGAACAGCTACAAGGTCTCGGGCGGCCTGCACGGCGTG  
GGCGTGAGTTGCGTCAACGCGCTCAGCAAGATGCTGCGCCTGACGGTGCGGCGCGACGGC  
AAGGTCCACGTGCTGGAGTTCAGCAAGGGCTTCGTGCAGAACCGCATCGTCGAGCAGGCG  
GGCGGCGTCGAGGTCTCGCCGATGCGCATCATGGGCGACACCGAGAAGCGCGGTACCGAG  
GTGCACTTCCTGCCCAGACAACGAGATCTTCAAGGAAAACGCCGATTTCCACTACGAGATC  
CTGGCCAAGCGCCTGCGCGAACTGAGCTTCTGAACAACGGCGTGCGCATCCGCCTGAAG  
GACGAGCGCAGCGGCAAGGAAGACGATTTCTCCGGCGCCGGCGGCGTGAGGGTTTCGT  
GAATTCATCAACAAGGGCAAGACCATCCTGCACCCACGCCCTTCTACGCCGCGGGCGAG  
AAGCCGGCCGAGACGTACGGCGGCATCCCCGGCACGCACATCGGCGTGGAAGTGTGATG  
CAGTGGAACAGCGGCTACACCGAGCAGGTGCTCTGTTTCACCAACAACATCCCGCAGCGC  
GACGGCGGCACCCACCTGACCGGCCTGCGCGCCGCGATGACCCGGATCATCAACAAGTAC  
ATCGAAGAAAACGAGCTGGCCAAGAAGGCCAAGGTGAGGTAACCGGCGACGACATGCGC  
GAAGAAGAGGACATGGCCAAGCGCCGTTTCGCGCCTGAAGGCGTTGATCACGCTCGGCAAG  
ACCCGCGGCTACCTGACGCAGGTGAGATCTCCGACCACCTGCCCAGACAAGCTGGTTCGAC  
GCCGAGACGATGGAAGTCGTGATCGCCATGTTGAACGACATGGGCATCGCGGTCTACGAG  
CAGACGCCCCAGCGCCGAGACGCTGTTCCAGAACAACGTCACCCCCACCGCCGCCACTGTC  
GAGGAAGCCGAGGAAGAAGCCGAGGCCGCGCTCTCCACCGTCGACAGCGAATTTCGGCCGC  
ACCACCGACCCGGTCCGCATGTACATGCGCGAAATGGGCACCGTCGAGCTGCTGACCCGC  
GAAGGCGAGATCGAGATCGCCAAGCGCATCGAAGGCGGCATGCAGGCCATGATGGAGGCG  
ATCAGCGCGTCGCCCCGCCACCATCGCCGCGATCCTGGTGATGGGCGAGGACATCCGCGAA  
GGCAAGGTCGTATCTCGACCATCGTCGACGGCTTCTCCAACCCCAACGAAGCCGACGAC  
TACGTGGCCGAGGAGGACTTCGACGAGTTCGACGAGGAAGACGACGACGACGGCAAGGGC  
GGCTCCAAGGCGCTGACCAAGAAGCTGGAAGAATTGAAGCGCGAGGCGCTGTTCGCGCTTC  
GAC

>CFBP3689 *Xylophilus ampelinus*

CACGCCGGCGGCAAGTTCAACCAGAACAGCTACAAGGTCTCGGGCGGCCTGCACGGCGTG  
GGCGTGAGTTGCGTCAACGCGCTCAGCAAGATGCTGCGCCTGACGGTGCGGCGCGACGGC  
AAGGTCCACGTGCTGGAGTTCAGCAAGGGCTTCGTGCAGAACCGCATCGTCGAGCAGGCG  
GGCGGCGTCGAGGTCTCGCCGATGCGCATCATGGGCGACACCGAGAAGCGCGGTACCGAG  
GTGCACTTCCTGCCCAGACAACGAGATCTTCAAGGAAAACGCCGATTTCCACTACGAGATC  
CTGGCCAAGCGCCTGCGCGAACTGAGCTTCTGAACAACGGCGTGCGCATCCGCCTGAAG  
GACGAGCGCAGCGGCAAGGAAGACGATTTCTCCGGCGCCGGCGGCGTGAGGGTTTCGT  
GAATTCATCAACAAGGGCAAGACCATCCTGCACCCACGCCCTTCTACGCCGCGGGCGAG  
AAGCCGGCCGAGACGTACGGCGGCATCCCCGGCACGCACATCGGCGTGGAAGTGTGATG  
CAGTGGAACAGCGGCTACACCGAGCAGGTGCTCTGTTTCACCAACAACATCCCGCAGCGC  
GACGGCGGCACCCACCTGACCGGCCTGCGCGCCGCGATGACCCGGATCATCAACAAGTAC  
ATCGAAGAAAACGAGCTGGCCAAGAAGGCCAAGGTGAGGTAACCGGCGACGACATGCGC  
GAAGAAGAGGACATGGCCAAGCGCCGTTTCGCGCCTGAAGGCGTTGATCACGCTCGGCAAG  
ACCCGCGGCTACCTGACGCAGGTGAGATCTCCGACCACCTGCCCAGACAAGCTGGTTCGAC  
GCCGAGACGATGGAAGTCGTGATCGCCATGTTGAACGACATGGGCATCGCGGTCTACGAG  
CAGACGCCCCAGCGCCGAGACGCTGTTCCAGAACAACGTCACCCCCACCGCCGCCACTGTC  
GAGGAAGCCGAGGAAGAAGCCGAGGCCGCGCTCTCCACCGTCGACAGCGAATTTCGGCCGC  
ACCACCGACCCGGTCCGCATGTACATGCGCGAAATGGGCACCGTCGAGCTGCTGACCCGC  
GAAGGCGAGATCGAGATCGCCAAGCGCATCGAAGGCGGCATGCAGGCCATGATGGAGGCG  
ATCAGCGCGTCGCCCCGCCACCATCGCCGCGATCCTGGTGATGGGCGAGGACATCCGCGAA  
GGCAAGGTCGTATCTCGACCATCGTCGACGGCTTCTCCAACCCCAACGAAGCCGACGAC  
TACGTGGCCGAGGAGGACTTCGACGAGTTCGACGAGGAAGACGACGACGACGGCAAGGGC  
GGCTCCAAGGCGCTGACCAAGAAGCTGGAAGAATTGAAGCGCGAGGCGCTGTTCGCGCTTC  
GAC

>CFBP3690 *Xylophilus ampelinus*

CACGCCGGCGGCAAGTTCAACCAGAACAGCTACAAGGTCTCGGGCGGCCTGCACGGCGTG  
GGCGTGAGTTGCGTCAACGCGCTCAGCAAGATGCTGCGCCTGACGGTGCGGCGCGACGGC  
AAGGTCCACGTGCTGGAGTTCAGCAAGGGCTTCGTGCAGAACCGCATCGTCGAGCAGGCG  
GGCGGCGTCGAGGTCTCGCCGATGCGCATCATGGGCGACACCGAGAAGCGCGGTACCGAG  
GTGCACTTCCTGCCCAGACAACGAGATCTTCAAGGAAAACGCCGATTTCCACTACGAGATC  
CTGGCCAAGCGCCTGCGCGAACTGAGCTTCTGAACAACGGCGTGCGCATCCGCCTGAAG  
GACGAGCGCAGCGGCAAGGAAGACGATTTCTCCGGCGCCGGCGGCGTGAGGGTTTCGT

GAATTCATCAACAAGGGCAAGACCATCCTGCACCCACGCCCTTCTACGCCGCGGGCGAG  
AAGCCGGCCGAGACGTACGGCGGCATCCCCGGCAGCACATCGGCGTGGAAGTGTGATG  
CAGTGGAACAGCGGCTACACCGAGCAGGTGCTCTGTTTCACCAACAACATCCCGCAGCGC  
GACGGCGGCACCCACCTGACCGGCCTGCGCGCCGCGATGACCCGGATCATCAACAAGTAC  
ATCGAAGAAAACGAGCTGGCCAAGAAGGCCAAGGTGAGGTAACCGGCGACGACATGCGC  
GAAGAAGAGGACATGGCCAAGCGCCGTTTCGCGCCTGAAGGCGTTGATCACGCTCGGCAAG  
ACCCGCGGCTACCTGACGCAGGTGAGATCTCCGACCACCTGCCCCACAAGCTGGTTCGAC  
GCCGAGACGATGGAAGTCGTGATCGCCATGTTGAACGACATGGGCATCGCGGTCTACGAG  
CAGACGCCCCGACGCCGAGACGCTGTTCCAGAACAACGTCACCCCCACCGCCGCCACTGTC  
GAGGAAGCCGAGGAAGAAGCCGAGGCCGCGCTCTCCACCGTCGACAGCGAATTTCGGCCGC  
ACCACCGACCCGGTCCGCATGTACATGCGCGAAATGGGCACCGTCGAGCTGCTGACCCGC  
GAAGGCGAGATCGAGATCGCCAAGCGCATCGAAGGCGGCATGCAGGCCATGATGGAGGCG  
ATCAGCGCGTCGCCCCGCCACCATCGCCGCGATCCTGGTGATGGGCGAGGACATCCGCGAA  
GGCAAGGTCGTATCTCGACCATCGTCGACGGCTTCTCCAACCCCAACGAAGCCGACGAC  
TACGTGGCCGAGGAGGACTTCGACGAGTTCGACGAGGAAGACGACGACGACGGAAGGGC  
GGCTCCAAGGCGCTGACCAAGAAGCTGGAAGAATTGAAGCGCGAGGCGCTGTTCGCGCTTC  
GAC

>CFBP3691 *Xylophilus ampelinus*

CACGCCGGCGGCAAGTTCAACCAGAACAGCTACAAGGTCTCGGGCGGCCTGCACGGCGTG  
GGCGTGAGTTGCGTCAACGCGCTCAGCAAGATGCTGCGCCTGACGGTGCGGCGCGACGGC  
AAGGTCCACGTGCTGGAGTTCAGCAAGGGCTTCGTGCAGAACCGCATCGTCGAGCAGGCG  
GGCGGCGTCGAGGTCTCGCCGATGCGCATCATGGGCGACACCGAGAAGCGCGGTACCGAG  
GTGCACTTCCTGCCCCACAACGAGATCTTCAAGGAAAACGCCGATTTCCACTACGAGATC  
CTGGCCAAGCGCCTGCGCGAACTGAGCTTCCTGAACAACGGCGTGCGCATCCGCCTGAAG  
GACGAGCGCAGCGGCAAGGAAGACGATTTCTCCGGCGCCGGCGGCGTGAGGGTTTCGTTC  
GAATTCATCAACAAGGGCAAGACCATCCTGCACCCACGCCCTTCTACGCCGCGGGCGAG  
AAGCCGGCCGAGACGTACGGCGGCATCCCCGGCAGCACATCGGCGTGGAAGTGTGATG  
CAGTGGAACAGCGGCTACACCGAGCAGGTGCTCTGTTTCACCAACAACATCCCGCAGCGC  
GACGGCGGCACCCACCTGACCGGCCTGCGCGCCGCGATGACCCGGATCATCAACAAGTAC  
ATCGAAGAAAACGAGCTGGCCAAGAAGGCCAAGGTGAGGTAACCGGCGACGACATGCGC  
GAAGAAGAGGACATGGCCAAGCGCCGTTTCGCGCCTGAAGGCGTTGATCACGCTCGGCAAG  
ACCCGCGGCTACCTGACGCAGGTGAGATCTCCGACCACCTGCCCCACAAGCTGGTTCGAC  
GCCGAGACGATGGAAGTCGTGATCGCCATGTTGAACGACATGGGCATCGCGGTCTACGAG  
CAGACGCCCCGACGCCGAGACGCTGTTCCAGAACAACGTCACCCCCACCGCCGCCACTGTC  
GAGGAAGCCGAGGAAGAAGCCGAGGCCGCGCTCTCCACCGTCGACAGCGAATTTCGGCCGC  
ACCACCGACCCGGTCCGCATGTACATGCGCGAAATGGGCACCGTCGAGCTGCTGACCCGC  
GAAGGCGAGATCGAGATCGCCAAGCGCATCGAAGGCGGCATGCAGGCCATGATGGAGGCG  
ATCAGCGCGTCGCCCCGCCACCATCGCCGCGATCCTGGTGATGGGCGAGGACATCCGCGAA  
GGCAAGGTCGTATCTCGACCATCGTCGACGGCTTCTCCAACCCCAACGAAGCCGACGAC  
TACGTGGCCGAGGAGGACTTCGACGAGTTCGACGAGGAAGACGACGACGACGGAAGGGC  
GGCTCCAAGGCGCTGACCAAGAAGCTGGAAGAATTGAAGCGCGAGGCGCTGTTCGCGCTTC  
GAC

>CFBP3692 *Xylophilus ampelinus*

CACGCCGGCGGCAAGTTCAACCAGAACAGCTACAAGGTCTCGGGCGGCCTGCACGGCGTG  
GGCGTGAGTTGCGTCAACGCGCTCAGCAAGATGCTGCGCCTGACGGTGCGGCGCGACGGC  
AAGGTCCACGTGCTGGAGTTCAGCAAGGGCTTCGTGCAGAACCGCATCGTCGAGCAGGCG  
GGCGGCGTCGAGGTCTCGCCGATGCGCATCATGGGCGACACCGAGAAGCGCGGTACCGAG  
GTGCACTTCCTGCCCCACAACGAGATCTTCAAGGAAAACGCCGATTTCCACTACGAGATC  
CTGGCCAAGCGCCTGCGCGAACTGAGCTTCCTGAACAACGGCGTGCGCATCCGCCTGAAG  
GACGAGCGCAGCGGCAAGGAAGACGATTTCTCCGGCGCCGGCGGCGTGAGGGTTTCGTTC  
GAATTCATCAACAAGGGCAAGACCATCCTGCACCCACGCCCTTCTACGCCGCGGGCGAG  
AAGCCGGCCGAGACGTACGGCGGCATCCCCGGCAGCACATCGGCGTGGAAGTGTGATG  
CAGTGGAACAGCGGCTACACCGAGCAGGTGCTCTGTTTCACCAACAACATCCCGCAGCGC  
GACGGCGGCACCCACCTGACCGGCCTGCGCGCCGCGATGACCCGGATCATCAACAAGTAC  
ATCGAAGAAAACGAGCTGGCCAAGAAGGCCAAGGTGAGGTAACCGGCGACGACATGCGC  
GAAGAAGAGGACATGGCCAAGCGCCGTTTCGCGCCTGAAGGCGTTGATCACGCTCGGCAAG  
ACCCGCGGCTACCTGACGCAGGTGAGATCTCCGACCACCTGCCCCACAAGCTGGTTCGAC  
GCCGAGACGATGGAAGTCGTGATCGCCATGTTGAACGACATGGGCATCGCGGTCTACGAG

CAGACGCCCCGACGCCGAGACGCTGTTCCAGAACAACGTCACCCCCACCGCCGCCACTGTC  
GAGGAAGCCGAGGAAGAAGCCGAGGCCGCGCTCTCCACCGTCGACAGCGAATTTCGGCCGC  
ACCACCGACCCGGTCCGCATGTACATGCGCGAAATGGGCACCGTCGAGCTGCTGACCCGC  
GAAGGCGAGATCGAGATCGCCAAGCGCATCGAAGGCGGCATGCAGGCCATGATGGAGGCG  
ATCAGCGCGTCGCCCCGCCACCATCGCCGCGATCCTGGTGATGGGCGAGGACATCCGCGAA  
GGCAAGGTCGTTCATCTCGACCATCGTCGACGGCTTCTCCAACCCCAACGAAGCCGACGAC  
TACGTGGCCGAGGAGGACTTCGACGAGTTCGACGAGGAAGACGACGACGACGCGCAAGGGC  
GGCTCCAAGGCGCTGACCAAGAAGCTGGAAGAATTGAAGCGCGAGGCGCTGTTCGCGCTTC  
GAC

>CFBP4717 *Xylophilus ampelinus*

CACGCCGGCGGCAAGTTCAACCAGAACAGCTACAAGGTCTCGGGCGGCCTGCACGGCGTG  
GGCGTGAGTTGCGTCAACGCGCTCAGCAAGATGCTGCGCCTGACGGTGCGGCGCGACGGC  
AAGGTCCACGTGCTGGAGTTCAGCAAGGGCTTCGTGCAGAACCGCATCGTCGAGCAGGCG  
GGCGGCGTCGAGGTCTCGCCGATGCGCATCATGGGCGACACCGAGAAGCGCGGTACCGAG  
GTGCACTTCTGCCCCGACAACGAGATCTTCAAGGAAAACGCCGATTTCCACTACGAGATC  
CTGGCCAAGCGCCTGCGCGAACTGAGCTTCTGAACAACGGCGTGCGCATCCGCCTGAAG  
GACGAGCGCAGCGGCAAGGAAGACGATTTCTCCGGCGCCGGCGGCGTGAGGGTTTCGTCTC  
GAATTCATCAACAAGGGCAAGACCATCCTGCACCCACGCCCTTCTACGCCGCGGGCGAG  
AAGCCGGCCGAGACGTACGGCGGCATCCCCGGCACGCACATCGGCGTGGAAGTGTTCGATG  
CAGTGGAACAGCGGCTACACCGAGCAGGTGCTCTGTTTCACCAACAACATCCCGCAGCGC  
GACGGCGGCACCCACCTGACCGGCCTGCGCGCCGCGATGACCCGGATCATCAACAAGTAC  
ATCGAAGAAAACGAGCTGGCCAAGAAGGCCAAGGTTCGAGGTAACCGGCGACGACATGCGC  
GAAGAAGAGGACATGGCCAAGCGCCGTTTCGCGCCTGAAGGCGTTGATCACGCTCGGCAAG  
ACCCGCGGCTACCTGACGCGAGTTCGAGATCTCCGACCACCTGCCCCGACAAGCTGGTTCGAC  
GCCGAGACGATGGAAGTTCGTGATCGCCATGTTGAACGACATGGGCATCGCGGTCTACGAG  
CAGACGCCCCGACGCCGAGACGCTGTTCCAGAACAACGTCACCCCCACCGCCGCCACTGTC  
GAGGAAGCCGAGGAAGAAGCCGAGGCCGCGCTCTCCACCGTCGACAGCGAATTTCGGCCGC  
ACCACCGACCCGGTCCGCATGTACATGCGCGAAATGGGCACCGTCGAGCTGCTGACCCGC  
GAAGGCGAGATCGAGATCGCCAAGCGCATCGAAGGCGGCCTGCAGGCCATGATGGAGGCG  
ATCAGCGCGTCGCCCCGCCACCATCGCCGCGATCCTGGTGATGGGCGAGGACATCCGCGAA  
GGCAAGGTCGTTCATCTCGACCATCGTCGACGGCTTCTCCAACCCCAACGAAGCCGACGAC  
TACGTGGCCGAGGAGGACTTCGACGAGTTCGACGAGGAAGACGACGACGACGCGCAAGGGC  
GGCTCCAAGGCGCTGACCAAGAAGCTGGAAGAATTGAAGCGCGAGGCGCTGTTCGCGCTTC  
GAC

>CFBP4718 *Xylophilus ampelinus*

CACGCCGGCGGCAAGTTCAACCAGAACAGCTACAAGGTCTCGGGCGGCCTGCACGGCGTG  
GGCGTGAGTTGCGTCAACGCGCTCAGCAAGATGCTGCGCCTGACGGTGCGGCGCGACGGC  
AAGGTCCACGTGCTGGAGTTCAGCAAGGGCTTCGTGCAGAACCGCATCGTCGAGCAGGCG  
GGCGGCGTCGAGGTCTCGCCGATGCGCATCATGGGCGACACCGAGAAGCGCGGTACCGAG  
GTGCACTTCTGCCCCGACAACGAGATCTTCAAGGAAAACGCCGATTTCCACTACGAGATC  
CTGGCCAAGCGCCTGCGCGAACTGAGCTTCTGAACAACGGCGTGCGCATCCGCCTGAAG  
GACGAGCGCAGCGGCAAGGAAGACGATTTCTCCGGCGCCGGCGGCGTGAGGGTTTCGTCTC  
GAATTCATCAACAAGGGCAAGACCATCCTGCACCCACGCCCTTCTACGCCGCGGGCGAG  
AAGCCGGCCGAGACGTACGGCGGCATCCCCGGCACGCACATCGGCGTGGAAGTGTTCGATG  
CAGTGGAACAGCGGCTACACCGAGCAGGTGCTCTGTTTCACCAACAACATCCCGCAGCGC  
GACGGCGGCACCCACCTGACCGGCCTGCGCGCCGCGATGACCCGGATCATCAACAAGTAC  
ATCGAAGAAAACGAGCTGGCCAAGAAGGCCAAGGTTCGAGGTAACCGGCGACGACATGCGC  
GAAGAAGAGGACATGGCCAAGCGCCGTTTCGCGCCTGAAGGCGTTGATCACGCTCGGCAAG  
ACCCGCGGCTACCTGACGCGAGTTCGAGATCTCCGACCACCTGCCCCGACAAGCTGGTTCGAC  
GCCGAGACGATGGAAGTTCGTGATCGCCATGTTGAACGACATGGGCATCGCGGTCTACGAG  
CAGAGCCCCGACGCCGAGACGCTGTTCCAGAACAACGTCACCCCCACCGCCGCCACTGTC  
GAGGAAGCCGAGGAAGAAGCCGAGGCCGCGCTCTCCACCGTCGACAGCGAATTTCGGCCGC  
ACCACCGACCCGGTCCGCATGTACATGCGCGAAATGGGCACCGTCGAGCTGCTGACCCGC  
GAAGGCGAGATCGAGATCGCCAAGCGCATCGAAGGCGGCCTGCAGGCCATGATGGAGGCG  
ATCAGCGCGTCGCCCCGCCACCATCGCCGCGATCCTGGTGATGGGCGAGGACATCCGCGAA  
GGCAAGGTCGTTCATCTCGACCATCGTCGACGGCTTCTCCAACCCCAACGAAGCCGACGAC  
TACGTGGCCGAGGAGGACTTCGACGAGTTCGACGAGGAAGACGACGACGACGCGCAAGGGC  
GGCTCCAAGGCGCTGACCAAGAAGCTGGAAGAATTGAAGCGCGAGGCGCTGTTCGCGCTTC

GAC

>CFBP4864 *Xylophilus ampelinus*

CACGCCGGCGGCAAGTTCAACCAGAACAGCTACAAGGTCTCGGGCGGCCTGCACGGCGTG  
GGCGTGAGTTGCGTCAACGCGCTCAGCAAGATGCTGCGCCTGACGGTGCGGCGCGACGGC  
AAGGTCCACGTGCTGGAGTTCAGCAAGGGCTTCGTGCAGAACCGCATCGTCGAGCAGGCG  
GGCGGCGTCGAGGTCTCGCCGATGCGCATCATGGGCGACACCGAGAAGCGCGGTACCGAG  
GTGCACTTCCTGCCCAGACAACGAGATCTTCAAGGAAAACGCCGATTTCCACTACGAGATC  
CTGGCCAAGCGCCTGCGCGAACTGAGCTTCCTGAACAACGGCGTGCGCATCCGCCTGAAG  
GACGAGCGCAGCGGCAAGGAAGACGATTTCTCCGGCGCCGGCGGCGTGAGGGTTTCGT  
GAATTCATCAACAAGGGCAAGACCATCCTGCACCCACGCCCTTCTACGCCGCGGGCGAG  
AAGCCGGCCGAGACGTACGGCGGCATCCCCGGCACGCACATCGGCGTGGAAGTGTTCGATG  
CAGTGGAACAGCGGCTACACCGAGCAGGTGCTCTGTTTCACCAACAACATCCCGCAGCGC  
GACGGCGGCACCCACCTGACCGGCCTGCGCGCCGCGATGACCCGGATCATCAACAAGTAC  
ATCGAAGAAAACGAGCTGGCCAAGAAGGCCAAGGTTCGAGGTAACCGGCGACGACATGCGC  
GAAGAAGAGGACATGGCCAAGCGCCGTTTCGCGCCTGAAGGCGTTGATCACGCTCGGCAAG  
ACCCGCGGCTACCTGACGCAGGTTCGAGATCTCCGACCACCTGCCCAGACAAGCTGGTTCGAC  
GCCGAGACGATGGAAGTCGTGATCGCCATGTTGAACGACATGGGCATCGCGGTCTACGAG  
CAGACGCCCCGACGCCGAGACGCTGTTCCAGAACAACGTCACCCCCACCGCCGCCACTGTC  
GAGGAAGCCGAGGAAGAAGCCGAGGCCGCGCTCTCCACCGTCGACAGCGAATTTCGGCCGC  
ACCACCGACCCGGTCCGCATGTACATGCGCGAAATGGGCACCGTCGAGCTGCTGACCCGC  
GAAGGCGAGATCGAGATCGCCAAGCGCATCGAAGGCGGCCTGCAGGCCATGATGGAGGCG  
ATCAGCGCGTCGCCCCGCCACCATCGCCGCGATCCTGGTGATGGGCGAGGACATCCGCGAA  
GGCAAGGTCGTATCTCGACCATCGTCGACGGCTTCTCCAACCCCAACGAAGCCGACGAC  
TACGTGGCCGAGGAGGACTTCGACGAGTTCGACGAGGAAGACGACGACGACGGCAAGGGC  
GGCTCCAAGGCGCTGACCAAGAAGCTGGAAGAATTGAAGCGCGAGGCGCTGTTCGCGCTTC  
GAC

>CFBP4866 *Xylophilus ampelinus*

CACGCCGGCGGCAAGTTCAACCAGAACAGCTACAAGGTCTCGGGCGGCCTGCACGGCGTG  
GGCGTGAGTTGCGTCAACGCGCTCAGCAAGATGCTGCGCCTGACGGTGCGGCGCGACGGC  
AAGGTCCACGTGCTGGAGTTCAGCAAGGGCTTCGTGCAGAACCGCATCGTCGAGCAGGCG  
GGCGGCGTCGAGGTCTCGCCGATGCGCATCATGGGCGACACCGAGAAGCGCGGTACCGAG  
GTGCACTTCCTGCCCAGACAACGAGATCTTCAAGGAAAACGCCGATTTCCACTACGAGATC  
CTGGCCAAGCGCCTGCGCGAACTGAGCTTCCTGAACAACGGCGTGCGCATCCGCCTGAAG  
GACGAGCGCAGCGGCAAGGAAGACGATTTCTCCGGCGCCGGCGGCGTGAGGGTTTCGT  
GAATTCATCAACAAGGGCAAGACCATCCTGCACCCACGCCCTTCTACGCCGCGGGCGAG  
AAGCCGGCCGAGACGTACGGCGGCATCCCCGGCACGCACATCGGCGTGGAAGTGTTCGATG  
CAGTGGAACAGCGGCTACACCGAGCAGGTGCTCTGTTTCACCAACAACATCCCGCAGCGC  
GACGGCGGCACCCACCTGACCGGCCTGCGCGCCGCGATGACCCGGATCATCAACAAGTAC  
ATCGAAGAAAACGAGCTGGCCAAGAAGGCCAAGGTTCGAGGTAACCGGCGACGACATGCGC  
GAAGAAGAGGACATGGCCAAGCGCCGTTTCGCGCCTGAAGGCGTTGATCACGCTCGGCAAG  
ACCCGCGGCTACCTGACGCAGGTTCGAGATCTCCGACCACCTGCCCAGACAAGCTGGTTCGAC  
GCCGAGACGATGGAAGTCGTGATCGCCATGTTGAACGACATGGGCATCGCGGTCTACGAG  
CAGACGCCCCGACGCCGAGACGCTGTTCCAGAACAACGTCACCCCCACCGCCGCCACTGTC  
GAGGAAGCCGAGGAAGAAGCCGAGGCCGCGCTCTCCACCGTCGACAGCGAATTTCGGCCGC  
ACCACCGACCCGGTCCGCATGTACATGCGCGAAATGGGCACCGTCGAGCTGCTGACCCGC  
GAAGGCGAGATCGAGATCGCCAAGCGCATCGAAGGCGGCCTGCAGGCCATGATGGAGGCG  
ATCAGCGCGTCGCCCCGCCACCATCGCCGCGATCCTGGTGATGGGCGAGGACATCCGCGAA  
GGCAAGGTCGTATCTCGACCATCGTCGACGGCTTCTCCAACCCCAACGAAGCCGACGAC  
TACGTGGCCGAGGAGGACTTCGACGAGTTCGACGAGGAAGACGACGACGACGGCAAGGGC  
GGCTCCAAGGCGCTGACCAAGAAGCTGGAAGAATTGAAGCGCGAGGCGCTGTTCGCGCTTC  
GAC

>CFBP4867 *Xylophilus ampelinus*

CACGCCGGCGGCAAGTTCAACCAGAACAGCTACAAGGTCTCGGGCGGCCTGCACGGCGTG  
GGCGTGAGTTGCGTCAACGCGCTCAGCAAGATGCTGCGCCTGACGGTGCGGCGCGACGGC  
AAGGTCCACGTGCTGGAGTTCAGCAAGGGCTTCGTGCAGAACCGCATCGTCGAGCAGGCG  
GGCGGCGTCGAGGTCTCGCCGATGCGCATCATGGGCGACACCGAGAAGCGCGGTACCGAG  
GTGCACTTCCTGCCCAGACAACGAGATCTTCAAGGAAAACGCCGATTTCCACTACGAGATC  
CTGGCCAAGCGCCTGCGCGAACTGAGCTTCCTGAACAACGGCGTGCGCATCCGCCTGAAG

GACGAGCGCAGCGGCAAGGAAGACGATTTCTCCGGCGCCGGCGGCGTGCAGGGTTTCGTC  
GAATTCATCAACAAGGGCAAGACCATCCTGCACCCACGCCCTTCTACGCCGCGGGCGAG  
AAGCCGCGCGAGACGTACGGCGGCATCCCCGGCACGCACATCGGCGTGGAAGTGTGATG  
CAGTGGAACAGCGGCTACACCGAGCAGGTGCTCTGTTTCACCAACAACATCCCGCAGCGC  
GACGGCGGCACCCACCTGACCGGCCTGCGCGCCGCGATGACCCGGATCATCAACAAGTAC  
ATCGAAGAAAACGAGCTGGCCAAGAAGGCCAAGGTGAGGTAACCGGCGACGACATGCGC  
GAAGAAGAGGACATGGCCAAGCGCCGTTTCGCGCCTGAAGGCGTTGATCACGCTCGGCAAG  
ACCCGCGGCTACCTGACGCAGGTCGAGATCTCCGACCACCTGCCCAGACAAGCTGGTCGAC  
GCCGAGACGATGGAAGTCGTGATCGCCATGTTGAACGACATGGGCATCGCGGTCTACGAG  
CAGACGCCCCGACGCCGAGACGCTGTTCCAGAACAACGTCACCCCCACCGCCGCCACTGTC  
GAGGAAGCCGAGGAAGAAGCCGAGGCCGCGCTCTCCACCGTCGACAGCGAATTTCGGCCGC  
ACCACCGACCCGGTCCGCATGTACATGCGCGAAATGGGCACCGTCGAGCTGCTGACCCGC  
GAAGGCGAGATCGAGATCGCCAAGCGCATCGAAGGCGGCCTGCAGGCCATGATGGAGGCG  
ATCAGCGCGTCGCCCCGCCACCATCGCCGCGATCCTGGTGATGGGCGAGGACATCCGCGAA  
GGCAAGGTCGTATCTCGACCATCGTCGACGGCTTCTCCAACCCCAACGAAGCCGACGAC  
TACGTGGCCGAGGAGGACTTCGACGAGTTCGACGAGGAAGACGACGACGACGGAAGGGC  
GGCTCCAAGGCGCTGACCAAGAAGCTGGAAGAATTGAAGCGCGAGGCGCTGTTCGCGCTTC  
GAC

>CFBP4868 *Xylophilus ampelinus*

CACGCCGGCGGCAAGTTCAACCAGAACAGCTACAAGGTCTCGGGCGGCCTGCACGGCGTG  
GGCGTGAGTTGCGTCAACGCGCTCAGCAAGATGCTGCGCCTGACGGTGCGGCGCGACGGC  
AAGGTCCACGTGCTGGAGTTCAGCAAGGGCTTCGTGCAGAACCGCATCGTCGAGCAGGCG  
GGCGGCGTCGAGGTCTCGCCGATGCGCATCATGGGCGACACCGAGAAGCGCGGTACCGAG  
GTGCACTTCCTGCCCCGACAACGAGATCTTCAAGGAAAACGCCGATTTCCACTACGAGATC  
CTGGCCAAGCGCCTGCGCGAACTGAGCTTCCTGAACAACGGCGTGCGCATCCGCCTGAAG  
GACGAGCGCAGCGGCAAGGAAGACGATTTCTCCGGCGCCGGCGGCGTGCAGGGTTTCGTC  
GAATTCATCAACAAGGGCAAGACCATCCTGCACCCACGCCCTTCTACGCCGCGGGCGAG  
AAGCCGCGCGAGACGTACGGCGGCATCCCCGGCACGCACATCGGCGTGGAAGTGTGATG  
CAGTGGAACAGCGGCTACACCGAGCAGGTGCTCTGTTTCACCAACAACATCCCGCAGCGC  
GACGGCGGCACCCACCTGACCGGCCTGCGCGCCGCGATGACCCGGATCATCAACAAGTAC  
ATCGAAGAAAACGAGCTGGCCAAGAAGGCCAAGGTGAGGTAACCGGCGACGACATGCGC  
GAAGAAGAGGACATGGCCAAGCGCCGTTTCGCGCCTGAAGGCGTTGATCACGCTCGGCAAG  
ACCCGCGGCTACCTGACGCAGGTCGAGATCTCCGACCACCTGCCCAGACAAGCTGGTCGAC  
GCCGAGACGATGGAAGTCGTGATCGCCATGTTGAACGACATGGGCATCGCGGTCTACGAG  
CAGACGCCCCGACGCCGAGACGCTGTTCCAGAACAACGTCACCCCCACCGCCGCCACTGTC  
GAGGAAGCCGAGGAAGAAGCCGAGGCCGCGCTCTCCACCGTCGACAGCGAATTTCGGCCGC  
ACCACCGACCCGGTCCGCATGTACATGCGCGAAATGGGCACCGTCGAGCTGCTGACCCGC  
GAAGGCGAGATCGAGATCGCCAAGCGCATCGAAGGCGGCCTGCAGGCCATGATGGAGGCG  
ATCAGCGCGTCGCCCCGCCACCATCGCCGCGATCCTGGTGATGGGCGAGGACATCCGCGAA  
GGCAAGGTCGTATCTCGACCATCGTCGACGGCTTCTCCAACCCCAACGAAGCCGACGAC  
TACGTGGCCGAGGAGGACTTCGACGAGTTCGACGAGGAAGACGACGACGACGGAAGGGC  
GGCTCCAAGGCGCTGACCAAGAAGCTGGAAGAATTGAAGCGCGAGGCGCTGTTCGCGCTTC  
GAC

>CFBP4869 *Xylophilus ampelinus*

CACGCCGGCGGCAAGTTCAACCAGAACAGCTACAAGGTCTCGGGCGGCCTGCACGGCGTG  
GGCGTGAGTTGCGTCAACGCGCTCAGCAAGATGCTGCGCCTGACGGTGCGGCGCGACGGC  
AAGGTCCACGTGCTGGAGTTCAGCAAGGGCTTCGTGCAGAACCGCATCGTCGAGCAGGCG  
GGCGGCGTCGAGGTCTCGCCGATGCGCATCATGGGCGACACCGAGAAGCGCGGTACCGAG  
GTGCACTTCCTGCCCCGACAACGAGATCTTCAAGGAAAACGCCGATTTCCACTACGAGATC  
CTGGCCAAGCGCCTGCGCGAACTGAGCTTCCTGAACAACGGCGTGCGCATCCGCCTGAAG  
GACGAGCGCAGCGGCAAGGAAGACGATTTCTCCGGCGCCGGCGGCGTGCAGGGTTTCGTC  
GAATTCATCAACAAGGGCAAGACCATCCTGCACCCACGCCCTTCTACGCCGCGGGCGAG  
AAGCCGCGCGAGACGTACGGCGGCATCCCCGGCACGCACATCGGCGTGGAAGTGTGATG  
CAGTGGAACAGCGGCTACACCGAGCAGGTGCTCTGTTTCACCAACAACATCCCGCAGCGC  
GACGGCGGCACCCACCTGACCGGCCTGCGCGCCGCGATGACCCGGATCATCAACAAGTAC  
ATCGAAGAAAACGAGCTGGCCAAGAAGGCCAAGGTGAGGTAACCGGCGACGACATGCGC  
GAAGAAGAGGACATGGCCAAGCGCCGTTTCGCGCCTGAAGGCGTTGATCACGCTCGGCAAG  
ACCCGCGGCTACCTGACGCAGGTCGAGATCTCCGACCACCTGCCCAGACAAGCTGGTCGAC

GCCGAGACGATGGAAGTCGTGATCGCCATGTTGAACGACATGGGCATCGCGGTCTACGAG  
CAGACGCCCCGACGCCGAGACGCTGTTCCAGAACAACGTCACCCCCACCGCCGCCACTGTCTC  
GAGGAAGCCGAGGAAGAAGCCGAGGCCGCGCTCTCCACCGTCGACAGCGAATTTCGGCCGC  
ACCACCGACCCGGTCCGCATGTACATGCGCGAAATGGGCACCGTCGAGCTGCTGACCCGC  
GAAGGCGAGATCGAGATCGCCAAGCGCATCGAAGGCGGCCTGCAGGCCATGATGGAGGCG  
ATCAGCGCGTCGCCCCGCCACCATCGCCGCGATCCTGGTGATGGGCGAGGACATCCGCGAA  
GGCAAGGTCGTTCATCTCGACCATCGTCGACGGCTTCTCCAACCCCAACGAAGCCGACGAC  
TACGTGGCCGAGGAGGACTTCGACGAGTTCGACGAGGAAGACGACGACGACGCGCAAGGGC  
GGCTCCAAGGCGCTGACCAAGAAGCTGGAAGAATTGAAGCGCGAGGCGCTGTCTCGCGCTTC  
GAC

>CFBP4870 *Xylophilus ampelinus*

CACGCCGGCGGCAAGTTCAACCAGAACAGCTACAAGGTCTCGGGCGGCCTGCACGGCGTG  
GGCGTGAGTTGCGTCAACGCGCTCAGCAAGATGCTGCGCCTGACGGTGCGGCGCGACGGC  
AAGGTCCACGTGCTGGAGTTCAGCAAGGGCTTCGTGCAGAACCGCATCGTCGAGCAGGCG  
GGCGGCGTCGAGGTCTCGCCGATGCGCATCATGGGCGACACCGAGAAGCGCGGTACCGAG  
GTGCACTTCTGCCCCGACAACGAGATCTTCAAGGAAAACGCCGATTTCCACTACGAGATC  
CTGGCCAAGCGCCTGCGCGAACTGAGCTTCTGAACAACGGCGTGCGCATCCGCCTGAAG  
GACGAGCGCAGCGGCAAGGAAGACGATTTCTCCGGCGCCGGCGGCGTGAGGGTTTCGTCTC  
GAATTCATCAACAAGGGCAAGACCATCCTGCACCCACGCCCTTCTACGCCGCGGGCGAG  
AAGCCGGCCGAGACGTACGGCGGCATCCCCGGCACGCACATCGGCGTGGAAGTGTCGATG  
CAGTGGAACAGCGGCTACACCGAGCAGGTGCTCTGTTTACCAACAACATCCCGCAGCGC  
GACGGCGGCACCCACCTGACCGGCTGCGCGCCGCGATGACCCGGATCATCAACAAGTAC  
ATCGAAGAAAACGAGCTGGCCAAGAAGGCCAAGGTGAGGTAACCGGCGACGACATGCGC  
GAAGAAGAGGACATGGCCAAGCGCCGTTTCGCGCCTGAAGGCGTTGATCACGCTCGGCAAG  
ACCCGCGGTACCTGACGCAGGTGAGATCTCCGACCACCTGCCCCGACAAGCTGGTCGAC  
GCCGAGACGATGGAAGTCGTGATCGCCATGTTGAACGACATGGGCATCGCGGTCTACGAG  
CAGACGCCCCGACGCCGAGACGCTGTTCCAGAACAACGTCACCCCCACCGCCGCCACTGTCTC  
GAGGAAGCCGAGGAAGAAGCCGAGGCCGCGCTCTCCACCGTCGACAGCGAATTTCGGCCGC  
ACCACCGACCCGGTCCGCATGTACATGCGCGAAATGGGCACCGTCGAGCTGCTGACCCGC  
GAAGGCGAGATCGAGATCGCCAAGCGCATCGAAGGCGGCCTGCAGGCCATGATGGAGGCG  
ATCAGCGCGTCGCCCCGCCACCATCGCCGCGATCCTGGTGATGGGCGAGGACATCCGCGAA  
GGCAAGGTCGTTCATCTCGACCATCGTCGACGGCTTCTCCAACCCCAACGAAGCCGACGAC  
TACGTGGCCGAGGAGGACTTCGACGAGTTCGACGAGGAAGACGACGACGACGCGCAAGGGC  
GGCTCCAAGGCGCTGACCAAGAAGCTGGAAGAATTGAAGCGCGAGGCGCTGTCTCGCGCTTC  
GAC

>CFBP4871 *Xylophilus ampelinus*

CACGCCGGCGGCAAGTTCAACCAGAACAGCTACAAGGTCTCGGGCGGCCTGCACGGCGTG  
GGCGTGAGTTGCGTCAACGCGCTCAGCAAGATGCTGCGCCTGACGGTGCGGCGCGACGGC  
AAGGTCCACGTGCTGGAGTTCAGCAAGGGCTTCGTGCAGAACCGCATCGTCGAGCAGGCG  
GGCGGCGTCGAGGTCTCGCCGATGCGCATCATGGGCGACACCGAGAAGCGCGGTACCGAG  
GTGCACTTCTGCCCCGACAACGAGATCTTCAAGGAAAACGCCGATTTCCACTACGAGATC  
CTGGCCAAGCGCCTGCGCGAACTGAGCTTCTGAACAACGGCGTGCGCATCCGCCTGAAG  
GACGAGCGCAGCGGCAAGGAAGACGATTTCTCCGGCGCCGGCGGCGTGAGGGTTTCGTCTC  
GAATTCATCAACAAGGGCAAGACCATCCTGCACCCACGCCCTTCTACGCCGCGGGCGAG  
AAGCCGGCCGAGACGTACGGCGGCATCCCCGGCACGCACATCGGCGTGGAAGTGTCGATG  
CAGTGGAACAGCGGCTACACCGAGCAGGTGCTCTGTTTACCAACAACATCCCGCAGCGC  
GACGGCGGCACCCACCTGACCGGCTGCGCGCCGCGATGACCCGGATCATCAACAAGTAC  
ATCGAAGAAAACGAGCTGGCCAAGAAGGCCAAGGTGAGGTAACCGGCGACGACATGCGC  
GAAGAAGAGGACATGGCCAAGCGCCGTTTCGCGCCTGAAGGCGTTGATCACGCTCGGCAAG  
ACCCGCGGTACCTGACGCAGGTGAGATCTCCGACCACCTGCCCCGACAAGCTGGTCGAC  
GCCGAGACGATGGAAGTCGTGATCGCCATGTTGAACGACATGGGCATCGCGGTCTACGAG  
CAGACGCCCCGACGCCGAGACGCTGTTCCAGAACAACGTCACCCCCACCGCCGCCACTGTCTC  
GAGGAAGCCGAGGAAGAAGCCGAGGCCGCGCTCTCCACCGTCGACAGCGAATTTCGGCCGC  
ACCACCGACCCGGTCCGCATGTACATGCGCGAAATGGGCACCGTCGAGCTGCTGACCCGC  
GAAGGCGAGATCGAGATCGCCAAGCGCATCGAAGGCGGCCTGCAGGCCATGATGGAGGCG  
ATCAGCGCGTCGCCCCGCCACCATCGCCGCGATCCTGGTGATGGGCGAGGACATCCGCGAA  
GGCAAGGTCGTTCATCTCGACCATCGTCGACGGCTTCTCCAACCCCAACGAAGCCGACGAC  
TACGTGGCCGAGGAGGACTTCGACGAGTTCGACGAGGAAGACGACGACGACGCGCAAGGGC



GGCTCCAAGGCGCTGACCAAGAAGCTGGAAGAATTGAAGCGCGAGGCGCTGTTCGCGCTTC  
GAC

>CFBP4872 *Xylophilus ampelinus*

CACGCCGGCGGCAAGTTCAACCAGAACAGCTACAAGGTCTCGGGCGGCCTGCACGGCGTG  
GGCGTGAGTTGCGTCAACGCGCTCAGCAAGATGCTGCGCCTGACGGTGCGGCGCGACGGC  
AAGGTCCACGTGCTGGAGTTCAGCAAGGGCTTCGTGCAGAACCGCATCGTCGAGCAGGCG  
GGCGGCGTCGAGGTCTCGCCGATGCGCATCATGGGCGACACCGAGAAGCGCGGTACCGAG  
GTGCACTTCCTGCCCAGAACGAGATCTTCAAGGAAAACGCCGATTTCCACTACGAGATC  
CTGGCCAAGCGCCTGCGCGAACTGAGCTTCTGAACAACGGCGTGCGCATCCGCCTGAAG  
GACGAGCGCAGCGGCAAGGAAGACGATTTCTCCGGCGCCGGCGGCGTGACAGGGTTTCGT  
GAATTCATCAACAAGGGCAAGACCATCCTGCACCCACGCCCTTCTACGCCGCGGGCGAG  
AAGCCGGCCGAGACGTACGGCGGCATCCCCGGCACGCACATCGGCGTGGAAGTGTTCGATG  
CAGTGGAACAGCGGCTACACCGAGCAGGTGCTCTGTTTCACCAACAACATCCCGCAGCGC  
GACGGCGGCACCCACCTGACCGGCCTGCGCGCCGCGATGACCCGGATCATCAACAAGTAC  
ATCGAAGAAAACGAGCTGGCCAAGAAGGCCAAGGTTCGAGGTAACCGGCGACGACATGCGC  
GAAGAAGAGGACATGGCCAAGCGCCGTTTCGCGCCTGAAGGCGTTGATCACGCTCGGCAAG  
ACCCGCGGCTACCTGACGCAGGTTCGAGATCTCCGACCACCTGCCCGACAAGCTGGTTCGAC  
GCCGAGACGATGGAAGTTCGTGATCGCCATGTTGAACGACATGGGCATCGCGGTCTACGAG  
CAGACGCCCCGACGCCGAGACGCTGTTCCAGAACAACGTCACCCCCACCGCCGCCACTGTC  
GAGGAAGCCGAGGAAGAAGCCGAGGCCGCGCTCTCCACCGTCGACAGCGAATTTCGGCCGC  
ACCACCGACCCGGTCCGCATGTACATGCGCGAAATGGGCACCGTCGAGCTGCTGACCCGC  
GAAGGCGAGATCGAGATCGCCAAGCGCATCGAAGGCGGCCTGCAGGCCATGATGGAGGCG  
ATCAGCGCGTCGCCCCGCCACCATCGCCGCGATCCTGGTGATGGGCGAGGACATCCGCGAA  
GGCAAGGTCGTATCTCGACCATCGTCGACGGCTTCTCCAACCCCAACGAAGCCGACGAC  
TACGTGGCCGAGGAGGACTTCGACGAGTTCGACGAGGAAGACGACGACGACGGAAGGGC  
GGCTCCAAGGCGCTGACCAAGAAGCTGGAAGAATTGAAGCGCGAGGCGCTGTTCGCGCTTC  
GAC

>CFBP4873 *Xylophilus ampelinus*

CACGCCGGCGGCAAGTTCAACCAGAACAGCTACAAGGTCTCGGGCGGCCTGCACGGCGTG  
GGCGTGAGTTGCGTCAACGCGCTCAGCAAGATGCTGCGCCTGACGGTGCGGCGCGACGGC  
AAGGTCCACGTGCTGGAGTTCAGCAAGGGCTTCGTGCAGAACCGCATCGTCGAGCAGGCG  
GGCGGCGTCGAGGTCTCGCCGATGCGCATCATGGGCGACACCGAGAAGCGCGGTACCGAG  
GTGCACTTCCTGCCCAGAACGAGATCTTCAAGGAAAACGCCGATTTCCACTACGAGATC  
CTGGCCAAGCGCCTGCGCGAACTGAGCTTCTGAACAACGGCGTGCGCATCCGCCTGAAG  
GACGAGCGCAGCGGCAAGGAAGACGATTTCTCCGGCGCCGGCGGCGTGACAGGGTTTCGT  
GAATTCATCAACAAGGGCAAGACCATCCTGCACCCACGCCCTTCTACGCCGCGGGCGAG  
AAGCCGGCCGAGACGTACGGCGGCATCCCCGGCACGCACATCGGCGTGGAAGTGTTCGATG  
CAGTGGAACAGCGGCTACACCGAGCAGGTGCTCTGTTTCACCAACAACATCCCGCAGCGC  
GACGGCGGCACCCACCTGACCGGCCTGCGCGCCGCGATGACCCGGATCATCAACAAGTAC  
ATCGAAGAAAACGAGCTGGCCAAGAAGGCCAAGGTTCGAGGTAACCGGCGACGACATGCGC  
GAAGAAGAGGACATGGCCAAGCGCCGTTTCGCGCCTGAAGGCGTTGATCACGCTCGGCAAG  
ACCCGCGGCTACCTGACGCAGGTTCGAGATCTCCGACCACCTGCCCGACAAGCTGGTTCGAC  
GCCGAGACGATGGAAGTTCGTGATCGCCATGTTGAACGACATGGGCATCGCGGTCTACGAG  
CAGACGCCCCGACGCCGAGACGCTGTTCCAGAACAACGTCACCCCCACCGCCGCCACTGTC  
GAGGAAGCCGAGGAAGAAGCCGAGGCCGCGCTCTCCACCGTCGACAGCGAATTTCGGCCGC  
ACCACCGACCCGGTCCGCATGTACATGCGCGAAATGGGCACCGTCGAGCTGCTGACCCGC  
GAAGGCGAGATCGAGATCGCCAAGCGCATCGAAGGCGGCCTGCAGGCCATGATGGAGGCG  
ATCAGCGCGTCGCCCCGCCACCATCGCCGCGATCCTGGTGATGGGCGAGGACATCCGCGAA  
GGCAAGGTCGTATCTCGACCATCGTCGACGGCTTCTCCAACCCCAACGAAGCCGACGAC  
TACGTGGCCGAGGAGGACTTCGACGAGTTCGACGAGGAAGACGACGACGACGGAAGGGC  
GGCTCCAAGGCGCTGACCAAGAAGCTGGAAGAATTGAAGCGCGAGGCGCTGTTCGCGCTTC  
GAC

>CFBP4874 *Xylophilus ampelinus*

CACGCCGGCGGCAAGTTCAACCAGAACAGCTACAAGGTCTCGGGCGGCCTGCACGGCGTG  
GGCGTGAGTTGCGTCAACGCGCTCAGCAAGATGCTGCGCCTGACGGTGCGGCGCGACGGC  
AAGGTCCACGTGCTGGAGTTCAGCAAGGGCTTCGTGCAGAACCGCATCGTCGAGCAGGCG  
GGCGGCGTCGAGGTCTCGCCGATGCGCATCATGGGCGACACCGAGAAGCGCGGTACCGAG  
GTGCACTTCCTGCCCAGAACGAGATCTTCAAGGAAAACGCCGATTTCCACTACGAGATC

CTGGCCAAGCGCCTGCGCGAACTGAGCTTCTTGAACAACGGCGTGCGCATCCGCCTGAAG  
GACGAGCGCAGCGGCAAGGAAGACGATTTCTCCGGCGCCGGCGGCGTGAGGGTTTCGTC  
GAATTCATCAACAAGGGCAAGACCATCCTGCACCCACGCCCTTCTACGCCGCGGGCGAG  
AAGCCGCGCGAGACGTACGGCGGCATCCCCGGCACGCACATCGGCGTGGAAGTGTGATG  
CAGTGGAACAGCGGCTACACCGAGCAGGTGCTCTGTTTACCAACAACATCCCGCAGCGC  
GACGGCGGCACCCACCTGACCGGCCTGCGCGCCGCGATGACCCGGATCATCAACAAGTAC  
ATCGAAGAAAACGAGCTGGCCAAGAAGGCCAAGGTGAGGTAACCGGCGACGACATGCGC  
GAAGAAGAGGACATGGCCAAGCGCCGTTTCGCGCCTGAAGGCGTTGATCACGCTCGGCAAG  
ACCCGCGGCTACCTGACGCAGGTCGAGATCTCCGACCACCTGCCCCACAAGCTGGTTCGAC  
GCCGAGACGATGGAAGTCGTGATCGCCATGTTGAACGACATGGGCATCGCGGTCTACGAG  
CAGACGCCCCGACGCCGAGACGCTGTTCCAGAACAACGTCACCCCCACCGCCGCCACTGTC  
GAGGAAGCCGAGGAAGAAGCCGAGGCCGCGCTCTCCACCGTCGACAGCGAATTTCGGCCGC  
ACCACCGACCCGGTCCGCATGTACATGCGCGAAATGGGCACCGTCGAGCTGCTGACCCGC  
GAAGGCGAGATCGAGATCGCCAAGCGCATCGAAGGCGGCCTGCAGGCCATGATGGAGGCG  
ATCAGCGCGTCGCCCCGCCACCATCGCCGCGATCCTGGTGATGGGCGAGGACATCCGCGAA  
GGCAAGGTCGTATCTCGACCATCGTCGACGGCTTCTCCAACCCCAACGAAGCCGACGAC  
TACGTGGCCGAGGAGGACTTCGACGAGTTCGACGAGGAAGACGACGACGACGGAAGGGC  
GGCTCCAAGGCGCTGACCAAGAAGCTGGAAGAATTGAAGCGCGAGGCGCTGTGCGGCTTC  
GAC

>CFBP4875 *Xylophilus ampelinus*

CACGCCGGCGGCAAGTTCAACCAGAACAGCTACAAGGTCTCGGGCGGCCTGCACGGCGTG  
GGCGTGAGTTGCGTCAACGCGCTCAGCAAGATGCTGCGCCTGACGGTGCGGCGCGACGGC  
AAGGTCCACGTGCTGGAGTTCAGCAAGGGCTTCGTGCAGAACCGCATCGTCGAGCAGGCG  
GGCGGCGTCGAGGTCTCGCCGATGCGCATCATGGGCGACACCGAGAAGCGCGGTACCGAG  
GTGCACTTCTGCCCCACAACGAGATCTTCAAGGAAAACGCCGATTTCCACTACGAGATC  
CTGGCCAAGCGCCTGCGCGAACTGAGCTTCTTGAACAACGGCGTGCGCATCCGCCTGAAG  
GACGAGCGCAGCGGCAAGGAAGACGATTTCTCCGGCGCCGGCGGCGTGAGGGTTTCGTC  
GAATTCATCAACAAGGGCAAGACCATCCTGCACCCACGCCCTTCTACGCCGCGGGCGAG  
AAGCCGCGCGAGACGTACGGCGGCATCCCCGGCACGCACATCGGCGTGGAAGTGTGATG  
CAGTGGAACAGCGGCTACACCGAGCAGGTGCTCTGTTTACCAACAACATCCCGCAGCGC  
GACGGCGGCACCCACCTGACCGGCCTGCGCGCCGCGATGACCCGGATCATCAACAAGTAC  
ATCGAAGAAAACGAGCTGGCCAAGAAGGCCAAGGTGAGGTAACCGGCGACGACATGCGC  
GAAGAAGAGGACATGGCCAAGCGCCGTTTCGCGCCTGAAGGCGTTGATCACGCTCGGCAAG  
ACCCGCGGCTACCTGACGCAGGTCGAGATCTCCGACCACCTGCCCCACAAGCTGGTTCGAC  
GCCGAGACGATGGAAGTCGTGATCGCCATGTTGAACGACATGGGCATCGCGGTCTACGAG  
CAGACGCCCCGACGCCGAGACGCTGTTCCAGAACAACGTCACCCCCACCGCCGCCACTGTC  
GAGGAAGCCGAGGAAGAAGCCGAGGCCGCGCTCTCCACCGTCGACAGCGAATTTCGGCCGC  
ACCACCGACCCGGTCCGCATGTACATGCGCGAAATGGGCACCGTCGAGCTGCTGACCCGC  
GAAGGCGAGATCGAGATCGCCAAGCGCATCGAAGGCGGCCTGCAGGCCATGATGGAGGCG  
ATCAGCGCGTCGCCCCGCCACCATCGCCGCGATCCTGGTGATGGGCGAGGACATCCGCGAA  
GGCAAGGTCGTATCTCGACCATCGTCGACGGCTTCTCCAACCCCAACGAAGCCGACGAC  
TACGTGGCCGAGGAGGACTTCGACGAGTTCGACGAGGAAGACGACGACGACGGAAGGGC  
GGCTCCAAGGCGCTGACCAAGAAGCTGGAAGAATTGAAGCGCGAGGCGCTGTGCGGCTTC  
GAC

>CFBP4876 *Xylophilus ampelinus*

CACGCCGGCGGCAAGTTCAACCAGAACAGCTACAAGGTCTCGGGCGGCCTGCACGGCGTG  
GGCGTGAGTTGCGTCAACGCGCTCAGCAAGATGCTGCGCCTGACGGTGCGGCGCGACGGC  
AAGGTCCACGTGCTGGAGTTCAGCAAGGGCTTCGTGCAGAACCGCATCGTCGAGCAGGCG  
GGCGGCGTCGAGGTCTCGCCGATGCGCATCATGGGCGACACCGAGAAGCGCGGTACCGAG  
GTGCACTTCTGCCCCACAACGAGATCTTCAAGGAAAACGCCGATTTCCACTACGAGATC  
CTGGCCAAGCGCCTGCGCGAACTGAGCTTCTTGAACAACGGCGTGCGCATCCGCCTGAAG  
GACGAGCGCAGCGGCAAGGAAGACGATTTCTCCGGCGCCGGCGGCGTGAGGGTTTCGTC  
GAATTCATCAACAAGGGCAAGACCATCCTGCACCCACGCCCTTCTACGCCGCGGGCGAG  
AAGCCGCGCGAGACGTACGGCGGCATCCCCGGCACGCACATCGGCGTGGAAGTGTGATG  
CAGTGGAACAGCGGCTACACCGAGCAGGTGCTCTGTTTACCAACAACATCCCGCAGCGC  
GACGGCGGCACCCACCTGACCGGCCTGCGCGCCGCGATGACCCGGATCATCAACAAGTAC  
ATCGAAGAAAACGAGCTGGCCAAGAAGGCCAAGGTGAGGTAACCGGCGACGACATGCGC  
GAAGAAGAGGACATGGCCAAGCGCCGTTTCGCGCCTGAAGGCGTTGATCACGCTCGGCAAG

ACCCGCGGCTACCTGACGCAGGTCGAGATCTCCGACCACCTGCCCCGACAAGCTGGTTCGAC  
GCCGAGACGATGGAAGTCGTGATCGCCATGTTGAACGACATGGGCATCGCGGTCTACGAG  
CAGACGCCCCGACGCCGAGACGCTGTTCCAGAACAACGTCACCCCCACCGCCGCCACTGTC  
GAGGAAGCCGAGGAAGAAGCCGAGGCCGCGCTCTCCACCGTCGACAGCGAATTTCGGCCGC  
ACCACCGACCCGGTCCGCATGTACATGCGCGAAATGGGCACCGTCGAGCTGCTGACCCGC  
GAAGGCGAGATCGAGATCGCCAAGCGCATCGAAGGCGGCCTGCAGGCCATGATGGAGGCG  
ATCAGCGCGTCGCCCCGCCACCATCGCCGCGATCCTGGTGATGGGCGAGGACATCCGCGAA  
GGCAAGGTCGTTCATCTCGACCATCGTCGACGGCTTCTCCAACCCCAACGAAGCCGACGAC  
TACGTGGCCGAGGAGGACTTCGACGAGTTCGACGAGGAAGACGACGACGACGGAAGGGC  
GGCTCCAAGGCGCTGACCAAGAAGCTGGAAGAATTGAAGCGCGAGGCGCTGTTCGCGCTTC  
GAC

>CFBP4877 *Xylophilus ampelinus*

CACGCCGGCGGCAAGTTCAACCAGAACAGCTACAAGGTCTCGGGCGGCCTGCACGGCGTG  
GGCGTGAGTTGCGTCAACGCGCTCAGCAAGATGCTGCGCCTGACGGTGCGGCGCGACGGC  
AAGGTCCACGTGCTGGAGTTCAGCAAGGGCTTCGTGCAGAACCGCATCGTCGAGCAGGCG  
GGCGGCGTCGAGGTCTCGCCGATGCGCATCATGGGCGACACCGAGAAGCGCGGTACCGAG  
GTGCACTTCTGCCCCGACAACGAGATCTTCAAGGAAAACGCCGATTTCCACTACGAGATC  
CTGGCCAAGCGCCTGCGCGAACTGAGCTTCTGAACAACGGCGTGCGCATCCGCCTGAAG  
GACGAGCGCAGCGGCAAGGAAGACGATTTCTCCGGCGCCGGCGGCGTGAGGGTTTCGTTC  
GAATTCATCAACAAGGGCAAGACCATCCTGCACCCACGCCCTTCTACGCCGCGGGCGAG  
AAGCCGGCCGAGACGTACGGCGGCATCCCCGGCACGCACATCGGCGTGGAAGTGTTCGATG  
CAGTGGAACAGCGGCTACACCGAGCAGGTGCTCTGTTTCACCAACAACATCCCGCAGCGC  
GACGGCGGCACCCACCTGACCGGCTGCGCGCCGCGATGACCCGGATCATCAACAAGTAC  
ATCGAAGAAAACGAGCTGGCCAAGAAGGCCAAGGTTCGAGGTAACCGGCGACGACATGCGC  
GAAGAAGAGGACATGGCCAAGCGCCGTTTCGCGCCTGAAGGCGTTGATCACGCTCGGCAAG  
ACCCGCGGCTACCTGACGCAGGTCGAGATCTCCGACCACCTGCCCCGACAAGCTGGTTCGAC  
GCCGAGACGATGGAAGTCGTGATCGCCATGTTGAACGACATGGGCATCGCGGTCTACGAG  
CAGACGCCCCGACGCCGAGACGCTGTTCCAGAACAACGTCACCCCCACCGCCGCCACTGTC  
GAGGAAGCCGAGGAAGAAGCCGAGGCCGCGCTCTCCACCGTCGACAGCGAATTTCGGCCGC  
ACCACCGACCCGGTCCGCATGTACATGCGCGAAATGGGCACCGTCGAGCTGCTGACCCGC  
GAAGGCGAGATCGAGATCGCCAAGCGCATCGAAGGCGGCCTGCAGGCCATGATGGAGGCG  
ATCAGCGCGTCGCCCCGCCACCATCGCCGCGATCCTGGTGATGGGCGAGGACATCCGCGAA  
GGCAAGGTCGTTCATCTCGACCATCGTCGACGGCTTCTCCAACCCCAACGAAGCCGACGAC  
TACGTGGCCGAGGAGGACTTCGACGAGTTCGACGAGGAAGACGACGACGACGGAAGGGC  
GGCTCCAAGGCGCTGACCAAGAAGCTGGAAGAATTGAAGCGCGAGGCGCTGTTCGCGCTTC  
GAC

>CFBP4878 *Xylophilus ampelinus*

CACGCCGGCGGCAAGTTCAACCAGAACAGCTACAAGGTCTCGGGCGGCCTGCACGGCGTG  
GGCGTGAGTTGCGTCAACGCGCTCAGCAAGATGCTGCGCCTGACGGTGCGGCGCGACGGC  
AAGGTCCACGTGCTGGAGTTCAGCAAGGGCTTCGTGCAGAACCGCATCGTCGAGCAGGCG  
GGCGGCGTCGAGGTCTCGCCGATGCGCATCATGGGCGACACCGAGAAGCGCGGTACCGAG  
GTGCACTTCTGCCCCGACAACGAGATCTTCAAGGAAAACGCCGATTTCCACTACGAGATC  
CTGGCCAAGCGCCTGCGCGAACTGAGCTTCTGAACAACGGCGTGCGCATCCGCCTGAAG  
GACGAGCGCAGCGGCAAGGAAGACGATTTCTCCGGCGCCGGCGGCGTGAGGGTTTCGTTC  
GAATTCATCAACAAGGGCAAGACCATCCTGCACCCACGCCCTTCTACGCCGCGGGCGAG  
AAGCCGGCCGAGACGTACGGCGGCATCCCCGGCACGCACATCGGCGTGGAAGTGTTCGATG  
CAGTGGAACAGCGGCTACACCGAGCAGGTGCTCTGTTTCACCAACAACATCCCGCAGCGC  
GACGGCGGCACCCACCTGACCGGCTGCGCGCCGCGATGACCCGGATCATCAACAAGTAC  
ATCGAAGAAAACGAGCTGGCCAAGAAGGCCAAGGTTCGAGGTAACCGGCGACGACATGCGC  
GAAGAAGAGGACATGGCCAAGCGCCGTTTCGCGCCTGAAGGCGTTGATCACGCTCGGCAAG  
ACCCGCGGCTACCTGACGCAGGTCGAGATCTCCGACCACCTGCCCCGACAAGCTGGTTCGAC  
GCCGAGACGATGGAAGTCGTGATCGCCATGTTGAACGACATGGGCATCGCGGTCTACGAG  
CAGACGCCCCGACGCCGAGACGCTGTTCCAGAACAACGTCACCCCCACCGCCGCCACTGTC  
GAGGAAGCCGAGGAAGAAGCCGAGGCCGCGCTCTCCACCGTCGACAGCGAATTTCGGCCGC  
ACCACCGACCCGGTCCGCATGTACATGCGCGAAATGGGCACCGTCGAGCTGCTGACCCGC  
GAAGGCGAGATCGAGATCGCCAAGCGCATCGAAGGCGGCCTGCAGGCCATGATGGAGGCG  
ATCAGCGCGTCGCCCCGCCACCATCGCCGCGATCCTGGTGATGGGCGAGGACATCCGCGAA  
GGCAAGGTCGTTCATCTCGACCATCGTCGACGGCTTCTCCAACCCCAACGAAGCCGACGAC

TACGTGGCCGAGGAGGACTTCGACGAGTTCGACGAGGAAGACGACGACGACGGCAAGGGC  
GGCTCCAAGGCGCTGACCAAGAAGCTGGAAGAATTGAAGCGCGAGGCGCTGTTCGCGCTTC  
GAC

>CFBP4879 *Xylophilus ampelinus*

CACGCCGGCGGCAAGTTCAACCAGAACAGCTACAAGGTCTCGGGCGGCCTGCACGGCGTG  
GGCGTGAGTTGCGTCAACGCGCTCAGCAAGATGCTGCGCCTGACGGTGCGGCGCGACGGC  
AAGGTCCACGTGCTGGAGTTCAGCAAGGGCTTCGTGCAGAACCGCATCGTCGAGCAGGCG  
GGCGGCGTCGAGGTCTCGCCGATGCGCATCATGGGCGACACCGAGAAGCGCGGTACCGAG  
GTGCACTTCCTGCCCCGACAACGAGATCTTCAAGGAAAACGCCGATTTCCACTACGAGATC  
CTGGCCAAGCGCCTGCGCGAACTGAGCTTCTGAACAACGGCGTGCGCATCCGCCTGAAG  
GACGAGCGCAGCGGCAAGGAAGACGATTTCTCCGGCGCCGGCGGCGTGAGGGTTTTCGTC  
GAATTCATCAACAAGGGCAAGACCATCCTGCACCCACGCCCTTCTACGCCGCGGGCGAG  
AAGCCGGCCGAGACGTACGGCGGCATCCCCGGCACGCACATCGGCGTGGAAGTGTTCGATG  
CAGTGGAACAGCGGCTACACCGAGCAGGTGCTCTGTTTCACCAACAACATCCCGCAGCGC  
GACGGCGGCACCCACCTGACCGGCCTGCGCGCCGCGATGACCCGGATCATCAACAAGTAC  
ATCGAAGAAAACGAGCTGGCCAAGAAGGCCAAGGTGAGGTAACCGGCGACGACATGCGC  
GAAGAAGAGGACATGGCCAAGCGCCGTTTCGCGCCTGAAGGCGTTGATCACGCTCGGCAAG  
ACCCGCGGCTACCTGACGCAGGTTCGAGATCTCCGACCACCTGCCCCGACAAGCTGGTTCGAC  
GCCGAGACGATGGAAGTTCGTGATCGCCATGTTGAACGACATGGGCATCGCGGTCTACGAG  
CAGACGCCCCGACGCCGAGACGCTGTTCCAGAACAACGTCACCCCCACCGCCGCCACTGTC  
GAGGAAGCCGAGGAAGAAGCCGAGGCCGCGCTCTCCACCGTCGACAGCGAATTTCGGCCGC  
ACCACCGACCCGGTCCGCATGTACATGCGCGAAATGGGCACCGTCGAGCTGCTGACCCGC  
GAAGGCGAGATCGAGATCGCCAAGCGCATCGAAGGCGGCCTGCAGGCCATGATGGAGGCG  
ATCAGCGCGTCGCCCCGCCACCATCGCCGCGATCCTGGTGATGGGCGAGGACATCCGCGAA  
GGCAAGGTCGTATCTCGACCATCGTCGACGGCTTCTCCAACCCCAACGAAGCCGACGAC  
TACGTGGCCGAGGAGGACTTCGACGAGTTCGACGAGGAAGACGACGACGACGGCAAGGGC  
GGCTCCAAGGCGCTGACCAAGAAGCTGGAAGAATTGAAGCGCGAGGCGCTGTTCGCGCTTC  
GAC

>CFBP4880 *Xylophilus ampelinus*

CACGCCGGCGGCAAGTTCAACCAGAACAGCTACAAGGTCTCGGGCGGCCTGCACGGCGTG  
GGCGTGAGTTGCGTCAACGCGCTCAGCAAGATGCTGCGCCTGACGGTGCGGCGCGACGGC  
AAGGTCCACGTGCTGGAGTTCAGCAAGGGCTTCGTGCAGAACCGCATCGTCGAGCAGGCG  
GGCGGCGTCGAGGTCTCGCCGATGCGCATCATGGGCGACACCGAGAAGCGCGGTACCGAG  
GTGCACTTCCTGCCCCGACAACGAGATCTTCAAGGAAAACGCCGATTTCCACTACGAGATC  
CTGGCCAAGCGCCTGCGCGAACTGAGCTTCTGAACAACGGCGTGCGCATCCGCCTGAAG  
GACGAGCGCAGCGGCAAGGAAGACGATTTCTCCGGCGCCGGCGGCGTGAGGGTTTTCGTC  
GAATTCATCAACAAGGGCAAGACCATCCTGCACCCACGCCCTTCTACGCCGCGGGCGAG  
AAGCCGGCCGAGACGTACGGCGGCATCCCCGGCACGCACATCGGCGTGGAAGTGTTCGATG  
CAGTGGAACAGCGGCTACACCGAGCAGGTGCTCTGTTTCACCAACAACATCCCGCAGCGC  
GACGGCGGCACCCACCTGACCGGCCTGCGCGCCGCGATGACCCGGATCATCAACAAGTAC  
ATCGAAGAAAACGAGCTGGCCAAGAAGGCCAAGGTGAGGTAACCGGCGACGACATGCGC  
GAAGAAGAGGACATGGCCAAGCGCCGTTTCGCGCCTGAAGGCGTTGATCACGCTCGGCAAG  
ACCCGCGGCTACCTGACGCAGGTTCGAGATCTCCGACCACCTGCCCCGACAAGCTGGTTCGAC  
GCCGAGACGATGGAAGTTCGTGATCGCCATGTTGAACGACATGGGCATCGCGGTCTACGAG  
CAGACGCCCCGACGCCGAGACGCTGTTCCAGAACAACGTCACCCCCACCGCCGCCACTGTC  
GAGGAAGCCGAGGAAGAAGCCGAGGCCGCGCTCTCCACCGTCGACAGCGAATTTCGGCCGC  
ACCACCGACCCGGTCCGCATGTACATGCGCGAAATGGGCACCGTCGAGCTGCTGACCCGC  
GAAGGCGAGATCGAGATCGCCAAGCGCATCGAAGGCGGCCTGCAGGCCATGATGGAGGCG  
ATCAGCGCGTCGCCCCGCCACCATCGCCGCGATCCTGGTGATGGGCGAGGACATCCGCGAA  
GGCAAGGTCGTATCTCGACCATCGTCGACGGCTTCTCCAACCCCAACGAAGCCGACGAC  
TACGTGGCCGAGGAGGACTTCGACGAGTTCGACGAGGAAGACGACGACGACGGCAAGGGC  
GGCTCCAAGGCGCTGACCAAGAAGCTGGAAGAATTGAAGCGCGAGGCGCTGTTCGCGCTTC  
GAC

>CFBP4881 *Xylophilus ampelinus*

CACGCCGGCGGCAAGTTCAACCAGAACAGCTACAAGGTCTCGGGCGGCCTGCACGGCGTG  
GGCGTGAGTTGCGTCAACGCGCTCAGCAAGATGCTGCGCCTGACGGTGCGGCGCGACGGC  
AAGGTCCACGTGCTGGAGTTCAGCAAGGGCTTCGTGCAGAACCGCATCGTCGAGCAGGCG  
GGCGGCGTCGAGGTCTCGCCGATGCGCATCATGGGCGACACCGAGAAGCGCGGTACCGAG

GTGCACTTCCTGCCCCGACAACGAGATCTTCAAGGAAAACGCCGATTTCCACTACGAGATC  
CTGGCCAAGCGCCTGCGCGAACTGAGCTTCTGAACAACGGCGTGCGCATCCGCCTGAAG  
GACGAGCGCAGCGGCAAGGAAGACGATTTCTCCGGCGCCGGCGGCGTGAGGGTTTCGTC  
GAATTCATCAACAAGGGCAAGACCATCCTGCACCCACGCCCTTCTACGCCGCGGGCGAG  
AAGCCGGCCGAGACGTACGGCGGCATCCCCGGCAGCACATCGGCGTGGAAGTGTTCGATG  
CAGTGGAACAGCGGCTACACCGAGCAGGTGCTCTGTTTCACCAACAACATCCCGCAGCGC  
GACGGCGGCACCCACCTGACCGGCCTGCGCGCCGCGATGACCCGGATCATCAACAAGTAC  
ATCGAAGAAAACGAGCTGGCCAAGAAGGCCAAGGTTCGAGGTAACCGGCGACGACATGCGC  
GAAGAAGAGGACATGGCCAAGCGCCGTTTCGCGCCTGAAGGCGTTGATCACGCTCGGCAAG  
ACCCGCGGCTACCTGACGCAGGTTCGAGATCTCCGACCACCTGCCCCGACAAGCTGGTTCGAC  
GCCGAGACGATGGAAGTTCGTGATCGCCATGTTGAACGACATGGGCATCGCGGTCTACGAG  
CAGACGCCCCGACGCCGAGACGCTGTTCCAGAACAACGTCACCCCCACCGCCGCCACTGTC  
GAGGAAGCCGAGGAAGAAGCCGAGGCCGCGCTCTCCACCGTCGACAGCGAATTTCGGCCGC  
ACCACCGACCCGGTCCGCATGTACATGCGCGAAATGGGCACCGTCGAGCTGCTGACCCGC  
GAAGGCGAGATCGAGATCGCCAAGCGCATCGAAGGCGGCCTGCAGGCCATGATGGAGGCG  
ATCAGCGCGTCGCCCCGCCACCATCGCCGCGATCCTGGTGATGGGCGAGGACATCCGCGAA  
GGCAAGGTCGTATCTCGACCATCGTCGACGGCTTCTCCAACCCCAACGAAGCCGACGAC  
TACGTGGCCGAGGAGGACTTCGACGAGTTCGACGAGGAAGACGACGACGACGGAAGGGC  
GGCTCCAAGGCGCTGACCAAGAAGCTGGAAGAATTGAAGCGCGAGGCGCTGTTCGCGCTTC  
GAC

>CFBP4882 *Xylophilus ampelinus*

CACGCCGGCGGCAAGTTCAACCAGAACAGCTACAAGGTCTCGGGCGGCCTGCACGGCGTG  
GGCGTGAGTTGCGTCAACGCGCTCAGCAAGATGCTGCGCCTGACGGTGCGGCGCGACGGC  
AAGGTCCACGTGCTGGAGTTCAGCAAGGGCTTCGTGCAGAACCGCATCGTCGAGCAGGCG  
GGCGGCGTCGAGGTCTCGCCGATGCGCATCATGGGCGACACCGAGAAGCGCGGTACCGAG  
GTGCACTTCCTGCCCCGACAACGAGATCTTCAAGGAAAACGCCGATTTCCACTACGAGATC  
CTGGCCAAGCGCCTGCGCGAACTGAGCTTCTGAACAACGGCGTGCGCATCCGCCTGAAG  
GACGAGCGCAGCGGCAAGGAAGACGATTTCTCCGGCGCCGGCGGCGTGAGGGTTTCGTC  
GAATTCATCAACAAGGGCAAGACCATCCTGCACCCACGCCCTTCTACGCCGCGGGCGAG  
AAGCCGGCCGAGACGTACGGCGGCATCCCCGGCAGCACATCGGCGTGGAAGTGTTCGATG  
CAGTGGAACAGCGGCTACACCGAGCAGGTGCTCTGTTTCACCAACAACATCCCGCAGCGC  
GACGGCGGCACCCACCTGACCGGCCTGCGCGCCGCGATGACCCGGATCATCAACAAGTAC  
ATCGAAGAAAACGAGCTGGCCAAGAAGGCCAAGGTTCGAGGTAACCGGCGACGACATGCGC  
GAAGAAGAGGACATGGCCAAGCGCCGTTTCGCGCCTGAAGGCGTTGATCACGCTCGGCAAG  
ACCCGCGGCTACCTGACGCAGGTTCGAGATCTCCGACCACCTGCCCCGACAAGCTGGTTCGAC  
GCCGAGACGATGGAAGTTCGTGATCGCCATGTTGAACGACATGGGCATCGCGGTCTACGAG  
CAGACGCCCCGACGCCGAGACGCTGTTCCAGAACAACGTCACCCCCACCGCCGCCACTGTC  
GAGGAAGCCGAGGAAGAAGCCGAGGCCGCGCTCTCCACCGTCGACAGCGAATTTCGGCCGC  
ACCACCGACCCGGTCCGCATGTACATGCGCGAAATGGGCACCGTCGAGCTGCTGACCCGC  
GAAGGCGAGATCGAGATCGCCAAGCGCATCGAAGGCGGCCTGCAGGCCATGATGGAGGCG  
ATCAGCGCGTCGCCCCGCCACCATCGCCGCGATCCTGGTGATGGGCGAGGACATCCGCGAA  
GGCAAGGTCGTATCTCGACCATCGTCGACGGCTTCTCCAACCCCAACGAAGCCGACGAC  
TACGTGGCCGAGGAGGACTTCGACGAGTTCGACGAGGAAGACGACGACGACGGAAGGGC  
GGCTCCAAGGCGCTGACCAAGAAGCTGGAAGAATTGAAGCGCGAGGCGCTGTTCGCGCTTC  
GAC

>CFBP4883 *Xylophilus ampelinus*

CACGCCGGCGGCAAGTTCAACCAGAACAGCTACAAGGTCTCGGGCGGCCTGCACGGCGTG  
GGCGTGAGTTGCGTCAACGCGCTCAGCAAGATGCTGCGCCTGACGGTGCGGCGCGACGGC  
AAGGTCCACGTGCTGGAGTTCAGCAAGGGCTTCGTGCAGAACCGCATCGTCGAGCAGGCG  
GGCGGCGTCGAGGTCTCGCCGATGCGCATCATGGGCGACACCGAGAAGCGCGGTACCGAG  
GTGCACTTCCTGCCCCGACAACGAGATCTTCAAGGAAAACGCCGATTTCCACTACGAGATC  
CTGGCCAAGCGCCTGCGCGAACTGAGCTTCTGAACAACGGCGTGCGCATCCGCCTGAAG  
GACGAGCGCAGCGGCAAGGAAGACGATTTCTCCGGCGCCGGCGGCGTGAGGGTTTCGTC  
GAATTCATCAACAAGGGCAAGACCATCCTGCACCCACGCCCTTCTACGCCGCGGGCGAG  
AAGCCGGCCGAGACGTACGGCGGCATCCCCGGCAGCACATCGGCGTGGAAGTGTTCGATG  
CAGTGGAACAGCGGCTACACCGAGCAGGTGCTCTGTTTCACCAACAACATCCCGCAGCGC  
GACGGCGGCACCCACCTGACCGGCCTGCGCGCCGCGATGACCCGGATCATCAACAAGTAC  
ATCGAAGAAAACGAGCTGGCCAAGAAGGCCAAGGTTCGAGGTAACCGGCGACGACATGCGC

GAAGAAGAGGACATGGCCAAGCGCCGTTTCGCGCCTGAAGGCGTTGATCACGCTCGGCAAG  
ACCCGCGGCTACCTGACGCAGGTCGAGATCTCCGACCACCTGCCCCACAAGCTGGTTCGAC  
GCCGAGACGATGGAAGTCGTGATCGCCATGTTGAACGACATGGGCATCGCGGTCTACGAG  
CAGACGCCCCGACGCCGAGACGCTGTTCCAGAACAACGTCACCCCCACCGCCGCCACTGTC  
GAGGAAGCCGAGGAAGAAGCCGAGGCCGCGCTCTCCACCGTCGACAGCGAATTTCGGCCGC  
ACCACCGACCCGGTCCGCATGTACATGCGCGAAATGGGCACCGTCGAGCTGCTGACCCGC  
GAAGGCGAGATCGAGATCGCCAAGCGCATCGAAGGCGGCCTGCAGGCCATGATGGAGGCG  
ATCAGCGCGTCGCCCCGCCACCATCGCCGCGATCCTGGTGATGGGCGAGGACATCCGCGAA  
GGCAAGGTCGTATCTCGACCATCGTCGACGGCTTCTCCAACCCCAACGAAGCCGACGAC  
TACGTGGCCGAGGAGGACTTCGACGAGTTCGACGAGGAAGACGACGACGACGGAAGGGC  
GGCTCCAAGGCGCTGACCAAGAAGCTGGAAGAATTGAAGCGCGAGGCGCTGTTCGCGCTTC  
GAC

>CFBP4947 *Xylophilus ampelinus*

CACGCCGGCGGCAAGTTCAACCAGAACAGCTACAAGGTCTCGGGCGGCCTGCACGGCGTG  
GGCGTGAGTTGCGTCAACGCGCTCAGCAAGATGCTGCGCCTGACGGTGCGGCGCGACGGC  
AAGGTCCACGTGCTGGAGTTCAGCAAGGGCTTCGTGCAGAACCGCATCGTCGAGCAGGCG  
GGCGGCGTCGAGGTCTCGCCGATGCGCATCATGGGCGACACCGAGAAGCGCGGTACCGAG  
GTGCACTTCTGCCCCGACAACGAGATCTTCAAGGAAAACGCCGATTTCCACTACGAGATC  
CTGGCCAAGCGCCTGCGCGAACTGAGCTTCTGAACAACGGCGTGCGCATCCGCCTGAAG  
GACGAGCGCAGCGGCAAGGAAGACGATTTCTCCGGCGCCGGCGGCGTGAGGGTTTCGTTC  
GAATTCATCAACAAGGGCAAGACCATCCTGCACCCACGCCCTTCTACGCCGCGGGCGAG  
AAGCCGGCCGAGACGTACGGCGGCATCCCCGGCACGCACATCGGCGTGGAAGTGTCGATG  
CAGTGGAACAGCGGCTACACCGAGCAGGTGCTCTGTTTCACCAACAACATCCCGCAGCGC  
GACGGCGGCACCCACCTGACCGGCCTGCGCGCCGCGATGACCCGGATCATCAACAAGTAC  
ATCGAAGAAAACGAGCTGGCCAAGAAGGCCAAGGTGAGGTAACCGGCGACGACATGCGC  
GAAGAAGAGGACATGGCCAAGCGCCGTTTCGCGCCTGAAGGCGTTGATCACGCTCGGCAAG  
ACCCGCGGCTACCTGACGCAGGTCGAGATCTCCGACCACCTGCCCCACAAGCTGGTTCGAC  
GCCGAGACGATGGAAGTCGTGATCGCCATGTTGAACGACATGGGCATCGCGGTCTACGAG  
CAGACGCCCCGACGCCGAGACGCTGTTCCAGAACAACGTCACCCCCACCGCCGCCACTGTC  
GAGGAAGCCGAGGAAGAAGCCGAGGCCGCGCTCTCCACCGTCGACAGCGAATTTCGGCCGC  
ACCACCGACCCGGTCCGCATGTACATGCGCGAAATGGGCACCGTCGAGCTGCTGACCCGC  
GAAGGCGAGATCGAGATCGCCAAGCGCATCGAAGGCGGCCTGCAGGCCATGATGGAGGCG  
ATCAGCGCGTCGCCCCGCCACCATCGCCGCGATCCTGGTGATGGGCGAGGACATCCGCGAA  
GGCAAGGTCGTATCTCGACCATCGTCGACGGCTTCTCCAACCCCAACGAAGCCGACGAC  
TACGTGGCCGAGGAGGACTTCGACGAGTTCGACGAGGAAGACGACGACGACGGAAGGGC  
GGCTCCAAGGCGCTGACCAAGAAGCTGGAAGAATTGAAGCGCGAGGCGCTGTTCGCGCTTC  
GAC

>CFBP4949 *Xylophilus ampelinus*

CACGCCGGCGGCAAGTTCAACCAGAACAGCTACAAGGTCTCGGGCGGCCTGCACGGCGTG  
GGCGTGAGTTGCGTCAACGCGCTCAGCAAGATGCTGCGCCTGACGGTGCGGCGCGACGGC  
AAGGTCCACGTGCTGGAGTTCAGCAAGGGCTTCGTGCAGAACCGCATCGTCGAGCAGGCG  
GGCGGCGTCGAGGTCTCGCCGATGCGCATCATGGGCGACACCGAGAAGCGCGGTACCGAG  
GTGCACTTCTGCCCCGACAACGAGATCTTCAAGGAAAACGCCGATTTCCACTACGAGATC  
CTGGCCAAGCGCCTGCGCGAACTGAGCTTCTGAACAACGGCGTGCGCATCCGCCTGAAG  
GACGAGCGCAGCGGCAAGGAAGACGATTTCTCCGGCGCCGGCGGCGTGAGGGTTTCGTTC  
GAATTCATCAACAAGGGCAAGACCATCCTGCACCCACGCCCTTCTACGCCGCGGGCGAG  
AAGCCGGCCGAGACGTACGGCGGCATCCCCGGCACGCACATCGGCGTGGAAGTGTCGATG  
CAGTGGAACAGCGGCTACACCGAGCAGGTGCTCTGTTTCACCAACAACATCCCGCAGCGC  
GACGGCGGCACCCACCTGACCGGCCTGCGCGCCGCGATGACCCGGATCATCAACAAGTAC  
ATCGAAGAAAACGAGCTGGCCAAGAAGGCCAAGGTGAGGTAACCGGCGACGACATGCGC  
GAAGAAGAGGACATGGCCAAGCGCCGTTTCGCGCCTGAAGGCGTTGATCACGCTCGGCAAG  
ACCCGCGGCTACCTGACGCAGGTCGAGATCTCCGACCACCTGCCCCACAAGCTGGTTCGAC  
GCCGAGACGATGGAAGTCGTGATCGCCATGTTGAACGACATGGGCATCGCGGTCTACGAG  
CAGACGCCCCGACGCCGAGACGCTGTTCCAGAACAACGTCACCCCCACCGCCGCCACTGTC  
GAGGAAGCCGAGGAAGAAGCCGAGGCCGCGCTCTCCACCGTCGACAGCGAATTTCGGCCGC  
ACCACCGACCCGGTCCGCATGTACATGCGCGAAATGGGCACCGTCGAGCTGCTGACCCGC  
GAAGGCGAGATCGAGATCGCCAAGCGCATCGAAGGCGGCCTGCAGGCCATGATGGAGGCG  
ATCAGCGCGTCGCCCCGCCACCATCGCCGCGATCCTGGTGATGGGCGAGGACATCCGCGAA

GGCAAGGTCGTCATCTCGACCATCGTCGACGGCTTCTCCAACCCCAACGAAGCCGACGAC  
TACGTGGCCGAGGAGGACTTCGACGAGTTCGACGAGGAAGACGACGACGACGGCAAGGGC  
GGCTCCAAGGCGCTGACCAAGAAGCTGGAAGAATTGAAGCGCGAGGCGCTGTCGCGCTTC  
GAC

>CFBP4977 *Xylophilus ampelinus*

CACGCCGGCGGCAAGTTCAACCAGAACAGCTACAAGGTCTCGGGCGGCCTGCACGGCGTG  
GGCGTGAGTTGCGTCAACGCGCTCAGCAAGATGCTGCGCCTGACGGTGCGGCGCGACGGC  
AAGGTCCACGTGCTGGAGTTCAGCAAGGGCTTCGTGCAGAACCGCATCGTCGAGCAGGCG  
GGCGGCGTCGAGGTCTCGCCGATGCGCATCATGGGCGACACCGAGAAGCGCGGTACCGAG  
GTGCACTTCCTGCCCCGACAACGAGATCTTCAAGGAAAACGCCGATTTCCACTACGAGATC  
CTGGCCAAGCGCCTGCGCGAACTGAGCTTCCTGAACAACGGCGTGCGCATCCGCCTGAAG  
GACGAGCGCAGCGGCAAGGAAGACGATTTCTCCGGCGCCGGCGGCGTGAGGGTTTTCGTC  
GAATTCATCAACAAGGGCAAGACCATCCTGCACCCACGCCCTTCTACGCCGCGGGCGAG  
AAGCCGGCCGAGACGTACGGCGGCATCCCCGGCACGCACATCGGCGTGGAAGTGTTCGATG  
CAGTGGAACAGCGGCTACACCGAGCAGGTGCTCTGTTTCACCAACAACATCCCGCAGCGC  
GACGGCGGCACCCACCTGACCGGCCTGCGCGCCGCGATGACCCGGATCATCAACAAGTAC  
ATCGAAGAAAACGAGCTGGCCAAGAAGGCCAAGGTTCGAGGTAACCGGCGACGACATGCGC  
GAAGAAGAGGACATGGCCAAGCGCCGTTTCGCGCCTGAAGGCGTTGATCACGCTCGGCAAG  
ACCCGCGGCTACCTGACGCAGGTCGAGATCTCCGACCACCTGCCCCGACAAGCTGGTCGAC  
GCCGAGACGATGGAAGTCGTGATCGCCATGTTGAACGACATGGGCATCGCGGTCTACGAG  
CAGACGCCCCGACGCCGAGACGCTGTTCCAGAACAACGTCACCCCCACCGCCGCCACTGTC  
GAGGAAGCCGAGGAAGAAGCCGAGGCCGCGCTCTCCACCGTCGACAGCGAATTTCGGCCGC  
ACCACCGACCCGGTCCGCATGTACATGCGCGAAATGGGCACCGTCGAGCTGCTGACCCGC  
GAAGGCGAGATCGAGATCGCCAAGCGCATCGAAGGCGGCCTGCAGGCCATGATGGAGGCG  
ATCAGCGCGTCGCCCCGCCACCATCGCCGCGATCCTGGTGATGGGCGAGGACATCCGCGAA  
GGCAAGGTCGTCATCTCGACCATCGTCGACGGCTTCTCCAACCCCAACGAAGCCGACGAC  
TACGTGGCCGAGGAGGACTTCGACGAGTTCGACGAGGAAGACGACGACGACGGCAAGGGC  
GGCTCCAAGGCGCTGACCAAGAAGCTGGAAGAATTGAAGCGCGAGGCGCTGTCGCGCTTC  
GAC

>CFBP4978 *Xylophilus ampelinus*

CACGCCGGCGGCAAGTTCAACCAGAACAGCTACAAGGTCTCGGGCGGCCTGCACGGCGTG  
GGCGTGAGTTGCGTCAACGCGCTCAGCAAGATGCTGCGCCTGACGGTGCGGCGCGACGGC  
AAGGTCCACGTGCTGGAGTTCAGCAAGGGCTTCGTGCAGAACCGCATCGTCGAGCAGGCG  
GGCGGCGTCGAGGTCTCGCCGATGCGCATCATGGGCGACACCGAGAAGCGCGGTACCGAG  
GTGCACTTCCTGCCCCGACAACGAGATCTTCAAGGAAAACGCCGATTTCCACTACGAGATC  
CTGGCCAAGCGCCTGCGCGAACTGAGCTTCCTGAACAACGGCGTGCGCATCCGCCTGAAG  
GACGAGCGCAGCGGCAAGGAAGACGATTTCTCCGGCGCCGGCGGCGTGAGGGTTTTCGTC  
GAATTCATCAACAAGGGCAAGACCATCCTGCACCCACGCCCTTCTACGCCGCGGGCGAG  
AAGCCGGCCGAGACGTACGGCGGCATCCCCGGCACGCACATCGGCGTGGAAGTGTTCGATG  
CAGTGGAACAGCGGCTACACCGAGCAGGTGCTCTGTTTCACCAACAACATCCCGCAGCGC  
GACGGCGGCACCCACCTGACCGGCCTGCGCGCCGCGATGACCCGGATCATCAACAAGTAC  
ATCGAAGAAAACGAGCTGGCCAAGAAGGCCAAGGTTCGAGGTAACCGGCGACGACATGCGC  
GAAGAAGAGGACATGGCCAAGCGCCGTTTCGCGCCTGAAGGCGTTGATCACGCTCGGCAAG  
ACCCGCGGCTACCTGACGCAGGTCGAGATCTCCGACCACCTGCCCCGACAAGCTGGTCGAC  
GCCGAGACGATGGAAGTCGTGATCGCCATGTTGAACGACATGGGCATCGCGGTCTACGAG  
CAGACGCCCCGACGCCGAGACGCTGTTCCAGAACAACGTCACCCCCACCGCCGCCACTGTC  
GAGGAAGCCGAGGAAGAAGCCGAGGCCGCGCTCTCCACCGTCGACAGCGAATTTCGGCCGC  
ACCACCGACCCGGTCCGCATGTACATGCGCGAAATGGGCACCGTCGAGCTGCTGACCCGC  
GAAGCGGAGATCGAGATCGCCAAGCGCATCGAAGGCGGCCTGCAGGCCATGATGGAGGCG  
ATCAGCGCGTCGCCCCGCCACCATCGCCGCGATCCTGGTGATGGGCGAGGACATCCGCGAA  
GGCAAGGTCGTCATCTCGACCATCGTCGACGGCTTCTCCAACCCCAACGAAGCCGACGAC  
TACGTGGCCGAGGAGGACTTCGACGAGTTCGACGAGGAAGACGACGACGACGGCAAGGGC  
GGCTCCAAGGCGCTGACCAAGAAGCTGGAAGAATTGAAGCGCGAGGCGCTGTCGCGCTTC  
GAC

>CFBP4979 *Xylophilus ampelinus*

CACGCCGGCGGCAAGTTCAACCAGAACAGCTACAAGGTCTCGGGCGGCCTGCACGGCGTG  
GGCGTGAGTTGCGTCAACGCGCTCAGCAAGATGCTGCGCCTGACGGTGCGGCGCGACGGC  
AAGGTCCACGTGCTGGAGTTCAGCAAGGGCTTCGTGCAGAACCGCATCGTCGAGCAGGCG

GGCGGCGTCGAGGTCTCGCCGATGCGCATCATGGGCGACACCGAGAAGCGCGGTACCGAG  
GTGCACTTCCTGCCCCGACAACGAGATCTTCAAGGAAAACGCCGATTTCCACTACGAGATC  
CTGGCCAAGCGCCTGCGCGAACTGAGCTTCTGAACAACGGCGTGCGCATCCGCCTGAAG  
GACGAGCGCAGCGGCAAGGAAGACGATTTCTCCGGCGCCGGCGGCGTGCGAGGGTTTCGTC  
GAATTCATCAACAAGGGCAAGACCATCCTGCACCCACGCCCTTCTACGCCGCGGGCGAG  
AAGCCGGCCGAGACGTACGGCGGCATCCCCGGCAGCACATCGGCGTGGAAGTGTTCGATG  
CAGTGGAACAGCGGCTACACCGAGCAGGTGCTCTGTTTCACCAACAACATCCCGCAGCGC  
GACGGCGGCACCCACCTGACCGGCCTGCGCGCCGCGATGACCCGGATCATCAACAAGTAC  
ATCGAAGAAAACGAGCTGGCCAAGAAGGCCAAGGTGAGGTAACCGGCGACGACATGCGC  
GAAGAAGAGGACATGGCCAAGCGCCGTTTCGCGCCTGAAGGCGTTGATCACGCTCGGCAAG  
ACCCGCGGCTACCTGACGCAGGTTCGAGATCTCCGACCACCTGCCCCGACAAGCTGGTTCGAC  
GCCGAGACGATGGAAGTCGTGATCGCCATGTTGAACGACATGGGCATCGCGGTCTACGAG  
CAGACGCCCCGACGCCGAGACGCTGTTCCAGAACAACGTACCCCCACCGCCGCCACTGTC  
GAGGAAGCCGAGGAAGAAGCCGAGGCCGCGCTCTCCACCGTCGACAGCGAATTTCGGCCGC  
ACCACCGACCCGGTCCGCATGTACATGCGCGAAATGGGCACCGTCGAGCTGCTGACCCGC  
GAAGGCGAGATCGAGATCGCCAAGCGCATCGAAGGCGGCCTGCAGGCCATGATGGAGGCG  
ATCAGCGCGTCGCCCCGCCACCATCGCCGCGATCCTGGTGATGGGCGAGGACATCCGCGAA  
GGCAAGGTCGTATCTCGACCATCGTCGACGGCTTCTCCAACCCCAACGAAGCCGACGAC  
TACGTGGCCGAGGAGGACTTCGACGAGTTCGACGAGGAAGACGACGACGACGGCAAGGGC  
GGCTCCAAGGCGCTGACCAAGAAGCTGGAAGAATTGAAGCGCGAGGCGCTGTTCGCGCTTC  
GAC

>CFBP4980 *Xylophilus ampelinus*

CACGCCGGCGGCAAGTTCAACCAGAACAGCTACAAGGTCTCGGGCGGCCTGCACGGCGTG  
GGCGTGAGTTGCGTCAACGCGCTCAGCAAGATGCTGCGCCTGACGGTGCGGCGCGACGGC  
AAGGTCCACGTGCTGGAGTTCAGCAAGGGCTTCGTGCAGAACCGCATCGTCGAGCAGGCG  
GGCGGCGTCGAGGTCTCGCCGATGCGCATCATGGGCGACACCGAGAAGCGCGGTACCGAG  
GTGCACTTCCTGCCCCGACAACGAGATCTTCAAGGAAAACGCCGATTTCCACTACGAGATC  
CTGGCCAAGCGCCTGCGCGAACTGAGCTTCTGAACAACGGCGTGCGCATCCGCCTGAAG  
GACGAGCGCAGCGGCAAGGAAGACGATTTCTCCGGCGCCGGCGGCGTGCGAGGGTTTCGTC  
GAATTCATCAACAAGGGCAAGACCATCCTGCACCCACGCCCTTCTACGCCGCGGGCGAG  
AAGCCGGCCGAGACGTACGGCGGCATCCCCGGCAGCACATCGGCGTGGAAGTGTTCGATG  
CAGTGGAACAGCGGCTACACCGAGCAGGTGCTCTGTTTCACCAACAACATCCCGCAGCGC  
GACGGCGGCACCCACCTGACCGGCCTGCGCGCCGCGATGACCCGGATCATCAACAAGTAC  
ATCGAAGAAAACGAGCTGGCCAAGAAGGCCAAGGTGAGGTAACCGGCGACGACATGCGC  
GAAGAAGAGGACATGGCCAAGCGCCGTTTCGCGCCTGAAGGCGTTGATCACGCTCGGCAAG  
ACCCGCGGCTACCTGACGCAGGTTCGAGATCTCCGACCACCTGCCCCGACAAGCTGGTTCGAC  
GCCGAGACGATGGAAGTCGTGATCGCCATGTTGAACGACATGGGCATCGCGGTCTACGAG  
CAGACGCCCCGACGCCGAGACGCTGTTCCAGAACAACGTACCCCCACCGCCGCCACTGTC  
GAGGAAGCCGAGGAAGAAGCCGAGGCCGCGCTCTCCACCGTCGACAGCGAATTTCGGCCGC  
ACCACCGACCCGGTCCGCATGTACATGCGCGAAATGGGCACCGTCGAGCTGCTGACCCGC  
GAAGGCGAGATCGAGATCGCCAAGCGCATCGAAGGCGGCCTGCAGGCCATGATGGAGGCG  
ATCAGCGCGTCGCCCCGCCACCATCGCCGCGATCCTGGTGATGGGCGAGGACATCCGCGAA  
GGCAAGGTCGTATCTCGACCATCGTCGACGGCTTCTCCAACCCCAACGAAGCCGACGAC  
TACGTGGCCGAGGAGGACTTCGACGAGTTCGACGAGGAAGACGACGACGACGGCAAGGGC  
GGCTCCAAGGCGCTGACCAAGAAGCTGGAAGAATTGAAGCGCGAGGCGCTGTTCGCGCTTC  
GAC

>CFBP5787 *Xylophilus ampelinus*

CACGCCGGCGGCAAGTTCAACCAGAACAGCTACAAGGTCTCGGGCGGCCTGCACGGCGTG  
GGCGTGAGTTGCGTCAACGCGCTCAGCAAGATGCTGCGCCTGACGGTGCGGCGCGACGGC  
AAGGTCCACGTGCTGGAGTTCAGCAAGGGCTTCGTGCAGAACCGCATCGTCGAGCAGGCG  
GGCGGCGTCGAGGTCTCGCCGATGCGCATCATGGGCGACACCGAGAAGCGCGGTACCGAG  
GTGCACTTCCTGCCCCGACAACGAGATCTTCAAGGAAAACGCCGATTTCCACTACGAGATC  
CTGGCCAAGCGCCTGCGCGAACTGAGCTTCTGAACAACGGCGTGCGCATCCGCCTGAAG  
GACGAGCGCAGCGGCAAGGAAGACGATTTCTCCGGCGCCGGCGGCGTGCGAGGGTTTCGTC  
GAATTCATCAACAAGGGCAAGACCATCCTGCACCCACGCCCTTCTACGCCGCGGGCGAG  
AAGCCGGCCGAGACGTACGGCGGCATCCCCGGCAGCACATCGGCGTGGAAGTGTTCGATG  
CAGTGGAACAGCGGCTACACCGAGCAGGTGCTCTGTTTCACCAACAACATCCCGCAGCGC  
GACGGCGGCACCCACCTGACCGGCCTGCGCGCCGCGATGACCCGGATCATCAACAAGTAC



ATCGAAGAAAACGAGCTGGCCAAGAAGGCCAAGGTTCGAGGTAACCGGCGACGACATGCGC  
GAAGAAGAGGACATGGCCAAGCGCCGTTTCGCGCCTGAAGGCGTTGATCACGCTCGGCAAG  
ACCCGCGGCTACCTGACGCAGGTTCGAGATCTCCGACCACCTGCCCCGACAAGCTGGTTCGAC  
GCCGAGACGATGGAAGTCGTGATCGCCATGTTGAACGACATGGGCATCGCGGTCTACGAG  
CAGACGCCCCGACGCCGAGACGCTGTTCCAGAACAACGTCACCCCCACCGCCGCCACTGTC  
GAGGAAGCCGAGGAAGAAGCCGAGGCCGCGCTCTCCACCGTCGACAGCGAATTTCGGCCGC  
ACCACCGACCCGGTCCGCATGTACATGCGCGAAATGGGCACCGTCGAGCTGCTGACCCGC  
GAAGGCGAGATCGAGATCGCCAAGCGCATCGAAGGCGGCCTGCAGGCCATGATGGAGGCG  
ATCAGCGCGTCGCCCCGCCACCATCGCCGCGATCCTGGTGATGGGCGAGGACATCCGCGAA  
GGCAAGGTCGTATCTCGACCATCGTCGACGGCTTCTCCAACCCCAACGAAGCCGACGAC  
TACGTGGCCGAGGAGGACTTCGACGAGTTCGACGAGGAAGACGACGACGACGGAAGGGC  
GGCTCCAAGGCGCTGACCAAGAAGCTGGAAGAATTGAAGCGCGAGGCGCTGTTCGCGCTTC  
GAC

>CFBP5821 *Xylophilus ampelinus*

CACGCCGGCGGCAAGTTCAACCAGAACAGCTACAAGGTCTCGGGCGGCCTGCACGGCGTG  
GGCGTGAGTTGCGTCAACGCGCTCAGCAAGATGCTGCGCCTGACGGTGCGGCGCGACGGC  
AAGGTCCACGTGCTGGAGTTCAGCAAGGGCTTCGTGCAGAACCGCATCGTCGAGCAGGCG  
GGCGGCGTCGAGGTCTCGCCGATGCGCATCATGGGCGACACCGAGAAGCGCGGTACCGAG  
GTGCACTTCCTGCCCCGACAACGAGATCTTCAAGGAAAACGCCGATTTCCACTACGAGATC  
CTGGCCAAGCGCCTGCGCGAACTGAGCTTCCTGAACAACGGCGTGCGCATCCGCCTGAAG  
GACGAGCGCAGCGGCAAGGAAGACGATTTCTCCGGCGCCGGCGGCGTGAGGGTTTCGTTC  
GAATTCATCAACAAGGGCAAGACCATCCTGCACCCACGCCCTTCTACGCCGCGGGCGAG  
AAGCCGGCCGAGACGTACGGCGGCATCCCCGGCACGCACATCGGCGTGGAAGTGTTCGATG  
CAGTGGAACAGCGGCTACACCGAGCAGGTGCTCTGTTTCACCAACAACATCCCGCAGCGC  
GACGGCGGCACCCACCTGACCGGCCTGCGCGCCGCGATGACCCGGATCATCAACAAGTAC  
ATCGAAGAAAACGAGCTGGCCAAGAAGGCCAAGGTTCGAGGTAACCGGCGACGACATGCGC  
GAAGAAGAGGACATGGCCAAGCGCCGTTTCGCGCCTGAAGGCGTTGATCACGCTCGGCAAG  
ACCCGCGGCTACCTGACGCAGGTTCGAGATCTCCGACCACCTGCCCCGACAAGCTGGTTCGAC  
GCCGAGACGATGGAAGTCGTGATCGCCATGTTGAACGACATGGGCATCGCGGTCTACGAG  
CAGACGCCCCGACGCCGAGACGCTGTTCCAGAACAACGTCACCCCCACCGCCGCCACTGTC  
GAGGAAGCCGAGGAAGAAGCCGAGGCCGCGCTCTCCACCGTCGACAGCGAATTTCGGCCGC  
ACCACCGACCCGGTCCGCATGTACATGCGCGAAATGGGCACCGTCGAGCTGCTGACCCGC  
GAAGGCGAGATCGAGATCGCCAAGCGCATCGAAGGCGGCCTGCAGGCCATGATGGAGGCG  
ATCAGCGCGTCGCCCCGCCACCATCGCCGCGATCCTGGTGATGGGCGAGGACATCCGCGAA  
GGCAAGGTCGTATCTCGACCATCGTCGACGGCTTCTCCAACCCCAACGAAGCCGACGAC  
TACGTGGCCGAGGAGGACTTCGACGAGTTCGACGAGGAAGACGACGACGACGGAAGGGC  
GGCTCCAAGGCGCTGACCAAGAAGCTGGAAGAATTGAAGCGCGAGGCGCTGTTCGCGCTTC  
GAC

>CFBP1192T *Xylophilus ampelinus*

CACGCCGGCGGCAAGTTCAACCAGAACAGCTACAAGGTCTCGGGCGGCCTGCACGGCGTG  
GGCGTGAGTTGCGTCAACGCGCTCAGCAAGATGCTGCGCCTGACGGTGCGGCGCGACGGC  
AAGGTCCACGTGCTGGAGTTCAGCAAGGGCTTCGTGCAGAACCGCATCGTCGAGCAGGCG  
GGCGGCGTCGAGGTCTCGCCGATGCGCATCATGGGCGACACCGAGAAGCGCGGTACCGAG  
GTGCACTTCCTGCCCCGACAACGAGATCTTCAAGGAAAACGCCGATTTCCACTACGAGATC  
CTGGCCAAGCGCCTGCGCGAACTGAGCTTCCTGAACAACGGCGTGCGCATCCGCCTGAAG  
GACGAGCGCAGCGGCAAGGAAGACGATTTCTCCGGCGCCGGCGGCGTGAGGGTTTCGTTC  
GAATTCATCAACAAGGGCAAGACCATCCTGCACCCACGCCCTTCTACGCCGCGGGCGAG  
AAGCCGGCCGAGACGTACGGCGGCATCCCCGGCACGCACATCGGCGTGGAAGTGTTCGATG  
CAGTGGAACAGCGGCTACACCGAGCAGGTGCTCTGTTTCACCAACAACATCCCGCAGCGC  
GACGGCGGCACCCACCTGACCGGCCTGCGCGCCGCGATGACCCGGATCATCAACAAGTAC  
ATCGAAGAAAACGAGCTGGCCAAGAAGGCCAAGGTTCGAGGTAACCGGCGACGACATGCGC  
GAAGAAGAGGACATGGCCAAGCGCCGTTTCGCGCCTGAAGGCGTTGATCACGCTCGGCAAG  
ACCCGCGGCTACCTGACGCAGGTTCGAGATCTCCGACCACCTGCCCCGACAAGCTGGTTCGAC  
GCCGAGACGATGGAAGTCGTGATCGCCATGTTGAACGACATGGGCATCGCGGTCTACGAG  
CAGACGCCCCGACGCCGAGACGCTGTTCCAGAACAACGTCACCCCCACCGCCGCCACTGTC  
GAGGAAGCCGAGGAAGAAGCCGAGGCCGCGCTCTCCACCGTCGACAGCGAATTTCGGCCGC  
ACCACCGACCCGGTCCGCATGTACATGCGCGAAATGGGCACCGTCGAGCTGCTGACCCGC  
GAAGGCGAGATCGAGATCGCCAAGCGCATCGAAGGCGGCATGCAGGCCATGATGGAGGCG

ATCAGCGCGTCGCCCCGCCACCATCGCCGCGATCCTGGTGATGGGCGAGGACATCCGCGAA  
GGCAAGGTCGTTCATCTCGACCATCGTCGACGGCTTCTCCAACCCCAACGAAGCCGACGAC  
TACGTGGCCGAGGAGGACTTCGACGAGTTCGACGAGGAAGACGACGACGACGGCAAGGGC  
GGCTCCAAGGCGCTGACCAAGAAGCTGGAAGAATTGAAGCGCGAGGCGCTGTCGCGCTTC  
GAC

>CFPB3232T *Acidovorax anthurii*

CACGCGGGCGGCAAGTTCAACCAGAACAGCTACAAGGTCTCGGGCGGCCTGCACGGCGTG  
GGCGTCTCGTGCGTGAACGCGCTCAGCAAGATGCTGCGCCTCACCGTGCGCCGCGAGGGC  
AAGGTGCACGTGCTCGAATTCAGCCAGGGTTTCGTGCAGAACCGCATCCTGGAGACGGTG  
AACGGCGTCGAGGTCTCGCCCATGCGCGTGACCGGGCGAGACCGACAAGCGCGGCACCGAG  
GTGCACTTCTGCCCCGACACCGAGATCTTCAAGGAGAACCACGACTTCCACTACGAGATC  
CTCGCCAAGCGCCTGCGCGAGCTCTCGTTCTTGAACAACGGCGTGCGCATCCGCCTGAGG  
GACGAGCGCACGGGCAAGGAAGACGACTTCTCCGGCGCCGGCGGCGTGATGGGCTTCGTG  
CAGTTTCATCAACGCCAGCAAGAAGGTGCTGCACCCCAACGCCTTCCACGCCACGGGCGAGC  
CGCCCGGGCGAGACCTACGGCGGCATCCCCGGCACCGAGATCGGCGTGGAAGTGGCCATG  
CAGTGGAACGACGGCTTCAACGAATCCGTGCTCTGCTTCACCAACAACATCCCGCAGCGC  
GACGGCGGCACCCACCTACGGGGCTGCGCGCGGCCATGACGCGCGTCATCGGCAAATAT  
ATCGAGCAGAACGAGCTGGCCAAGAAGGCCAAGGTGAGGTGAGCGGCGACGACATGCGC  
GAAGAGGAAGACCTGGCCAAGCGCCGTTCCCGCCTGAAGGCCCTGATCACGCTGGGCAAG  
ACCCGCGGTACCTCACGCAGGTGAGATCTCCGACCACCTGCCCCGACAAGCTCGTCGAT  
GCCGAGACCATGGAAGTCGTGGTCACCATGCTCAACGACATGGGCGTGGCCGTGTACGAG  
CAGACGCCCCGACGCCGAGACGCTGTTCCAGAACAACGTGACGCCCACGGCCACCACCGTG  
GAAGAGGCCGAGGAAGAAGCCGAGGCCGCGCTCTCCACCGTGGACAGCGAATTTCGGCCGC  
ACCACCGACCCCGTGCGCATGTACATGCGCGAGATGGGCACGGTGGAGCTGCTCACGCGC  
GAGGGCGAGATCGAGATCGCCAAGCGCATCGAAGGCGGCCTGCAGGCCATGATGGAAGCC  
ATCAGCGCGTCTCCCGCCACCATCGCCGAGATCCTCGCCATGGGCGAGGAGATCCGCGAG  
GGCAAGGTCGTTCATCTCCACCATCGTGACGGCTTCTCCAACCCCAACGAGGCCGATGAC  
TACGTGGCCGAGGAAGACTTCGACGAGTTCGACGAAGAGGACGACGACGACGGCAAGGGC  
GGCTCCAAGGCCCTACCAAGAAGCTGGAAGAACTCAAGAACGAGGCCCTGCGCCGCTTC  
GAC
